# Supplementary figures and images for: Beaver dam influences on streamflow hydraulic properties and thermal regimes
Source: Copernicus journal article supplement (doi:10.5194/hess-2017-521), 2017-10-04

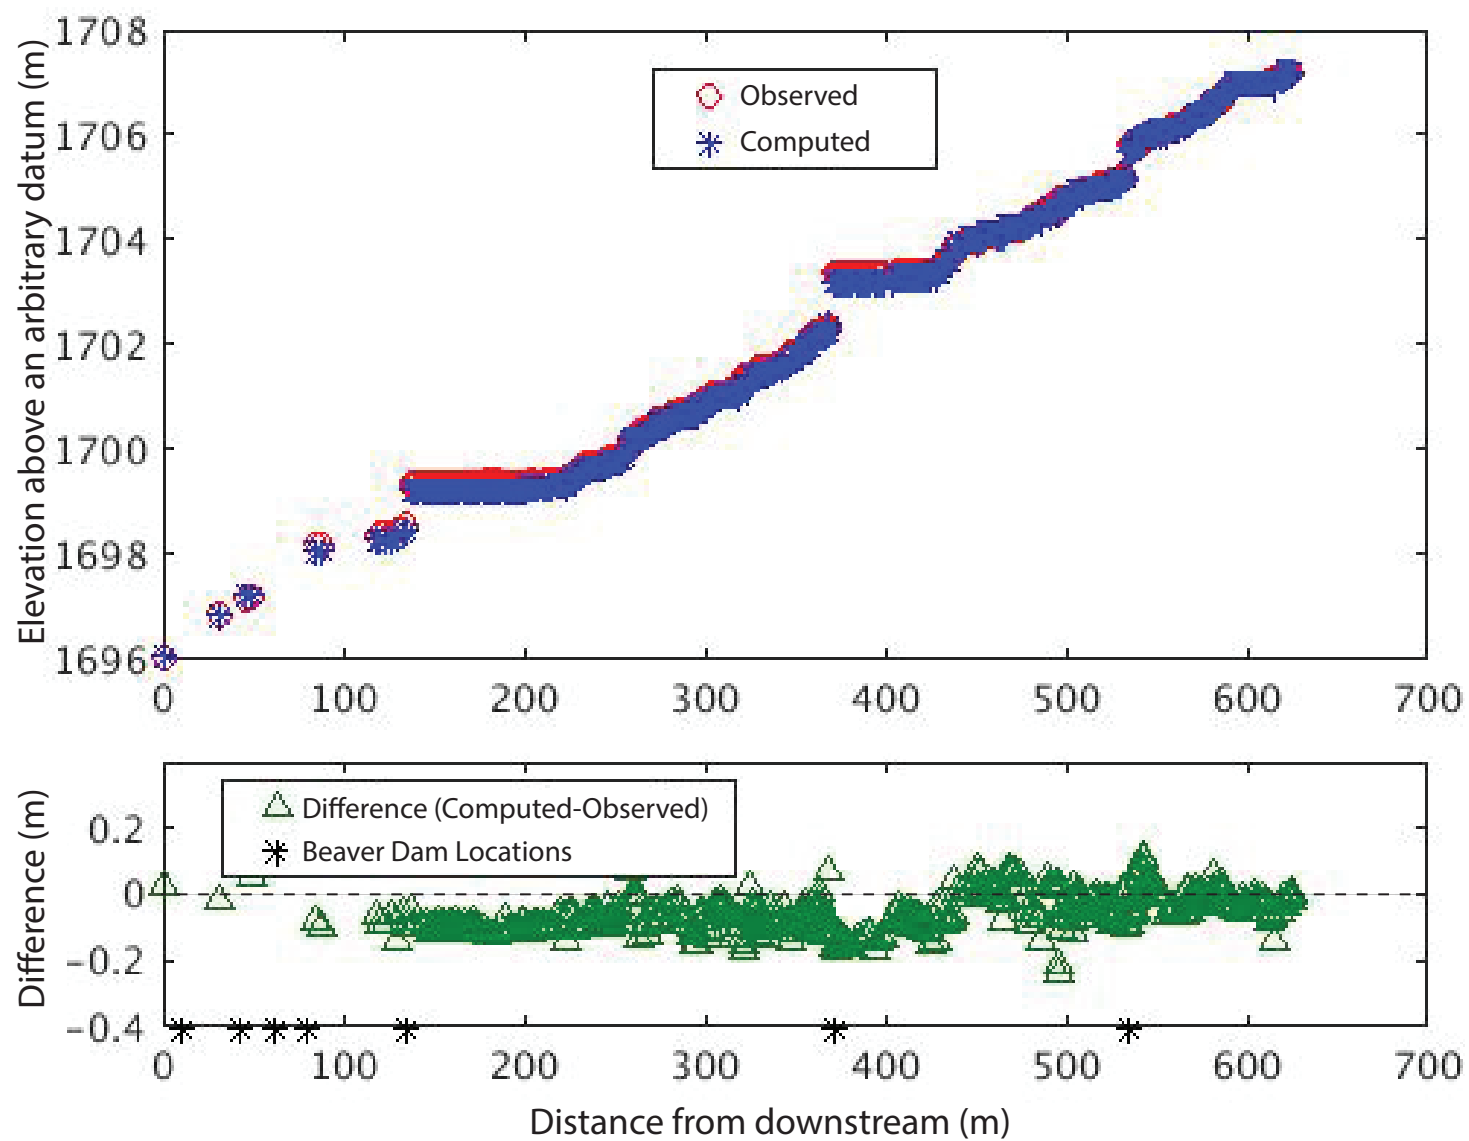

SI Figure 1

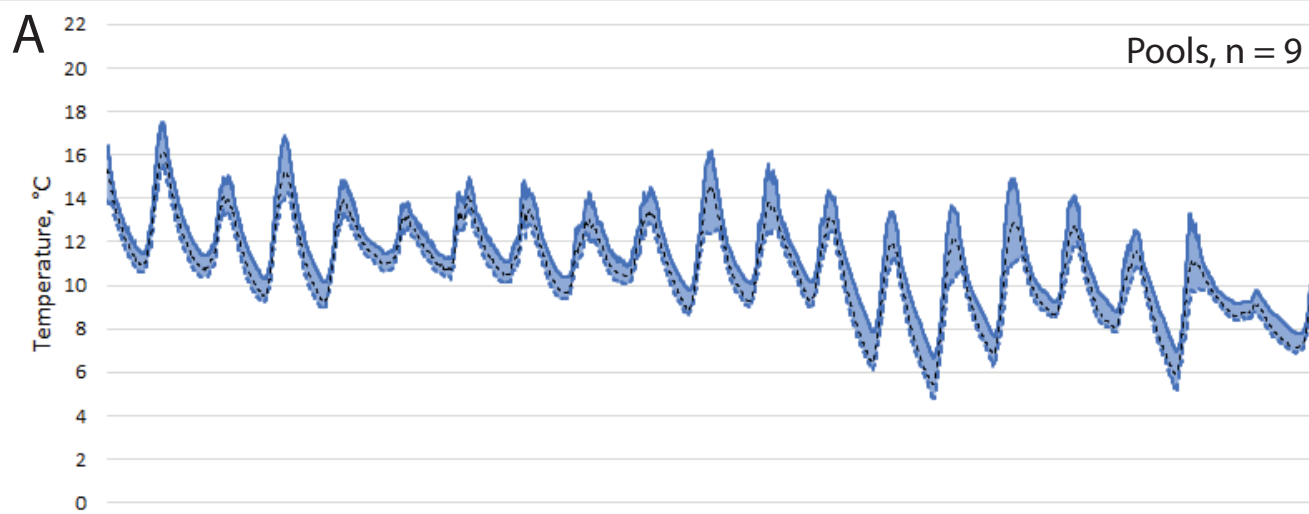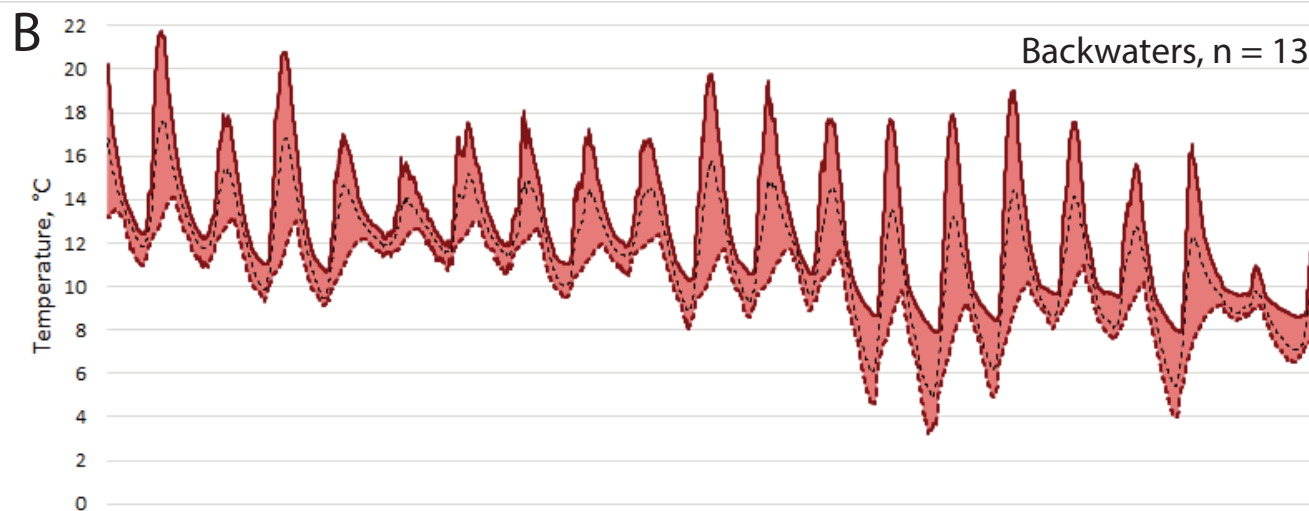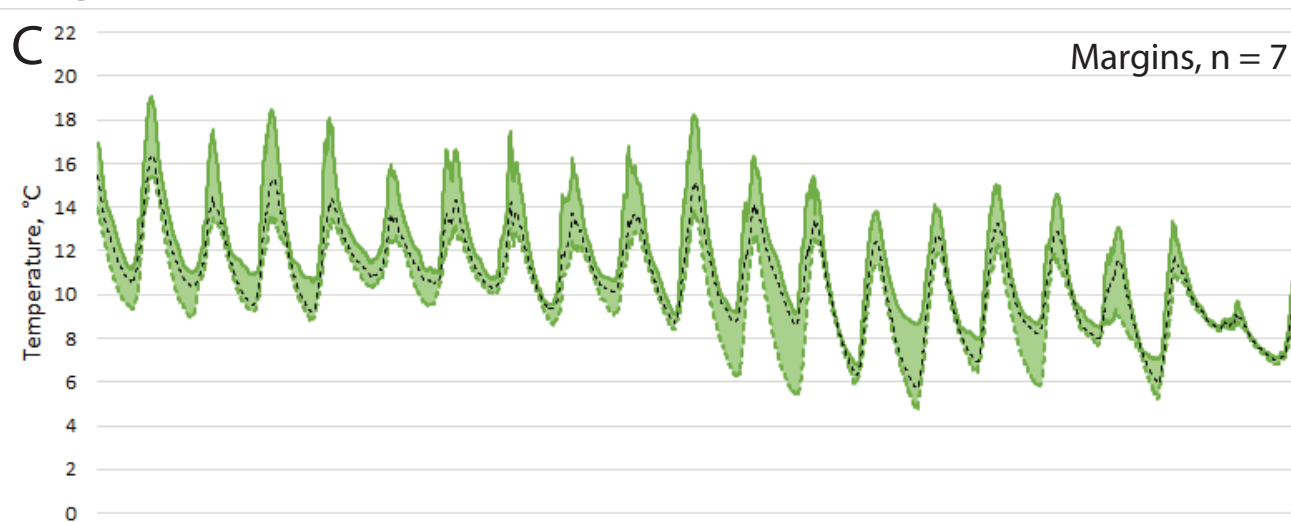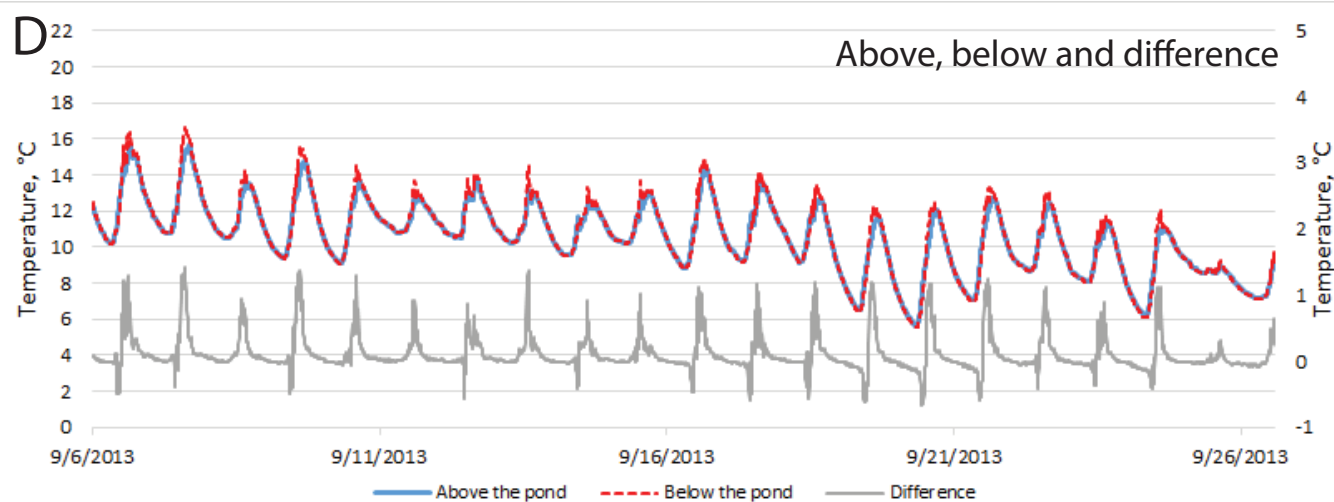

SI Figure 2



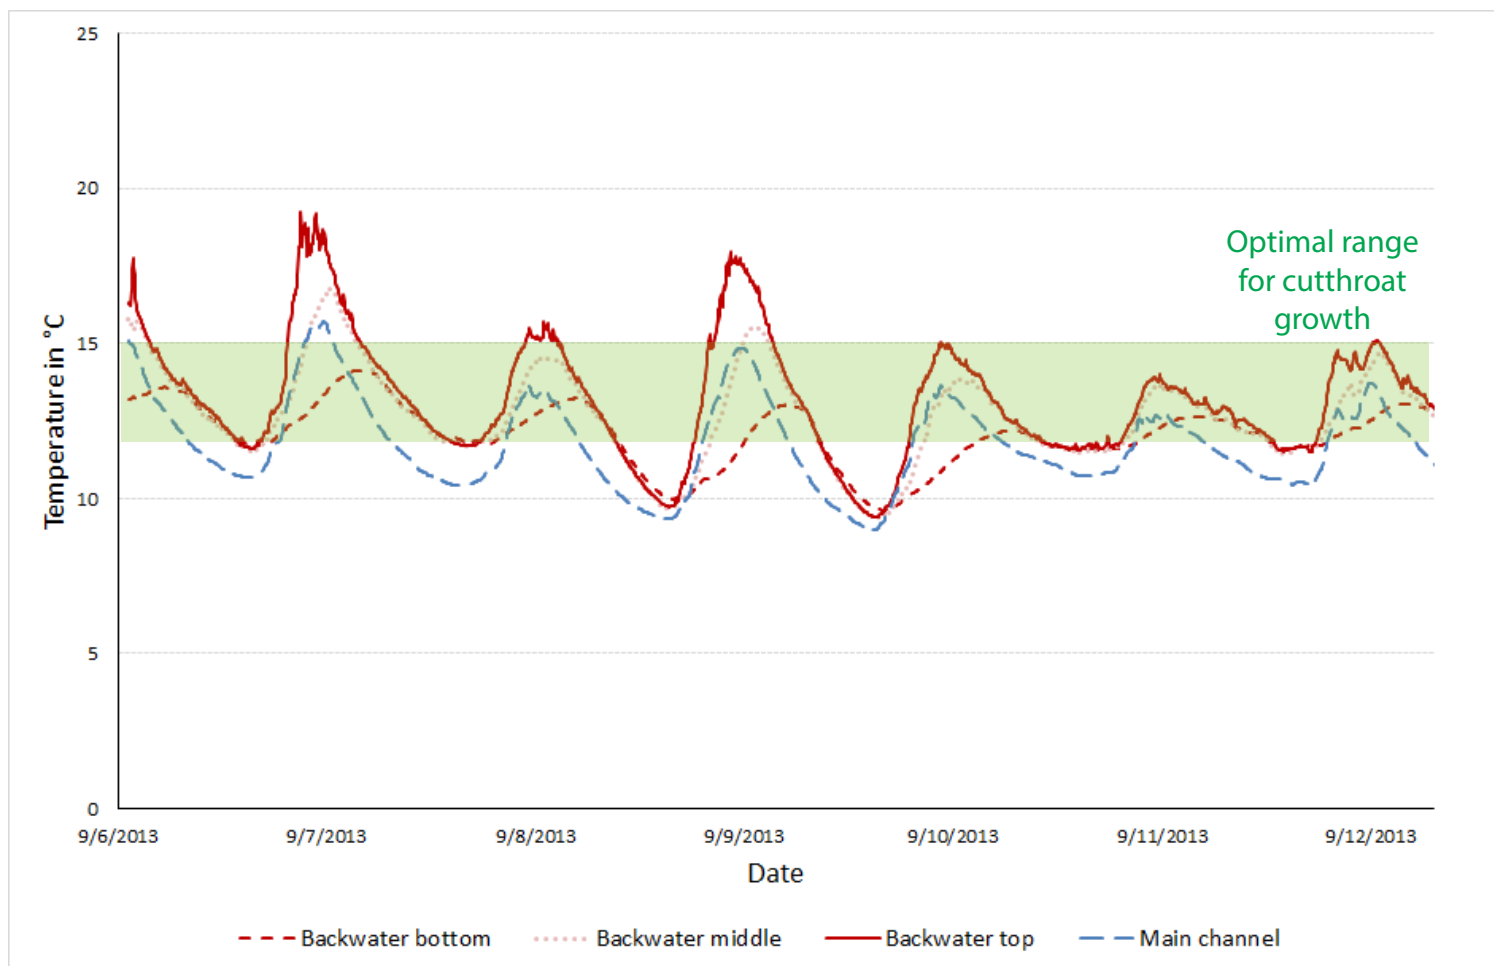

SI Figure 3

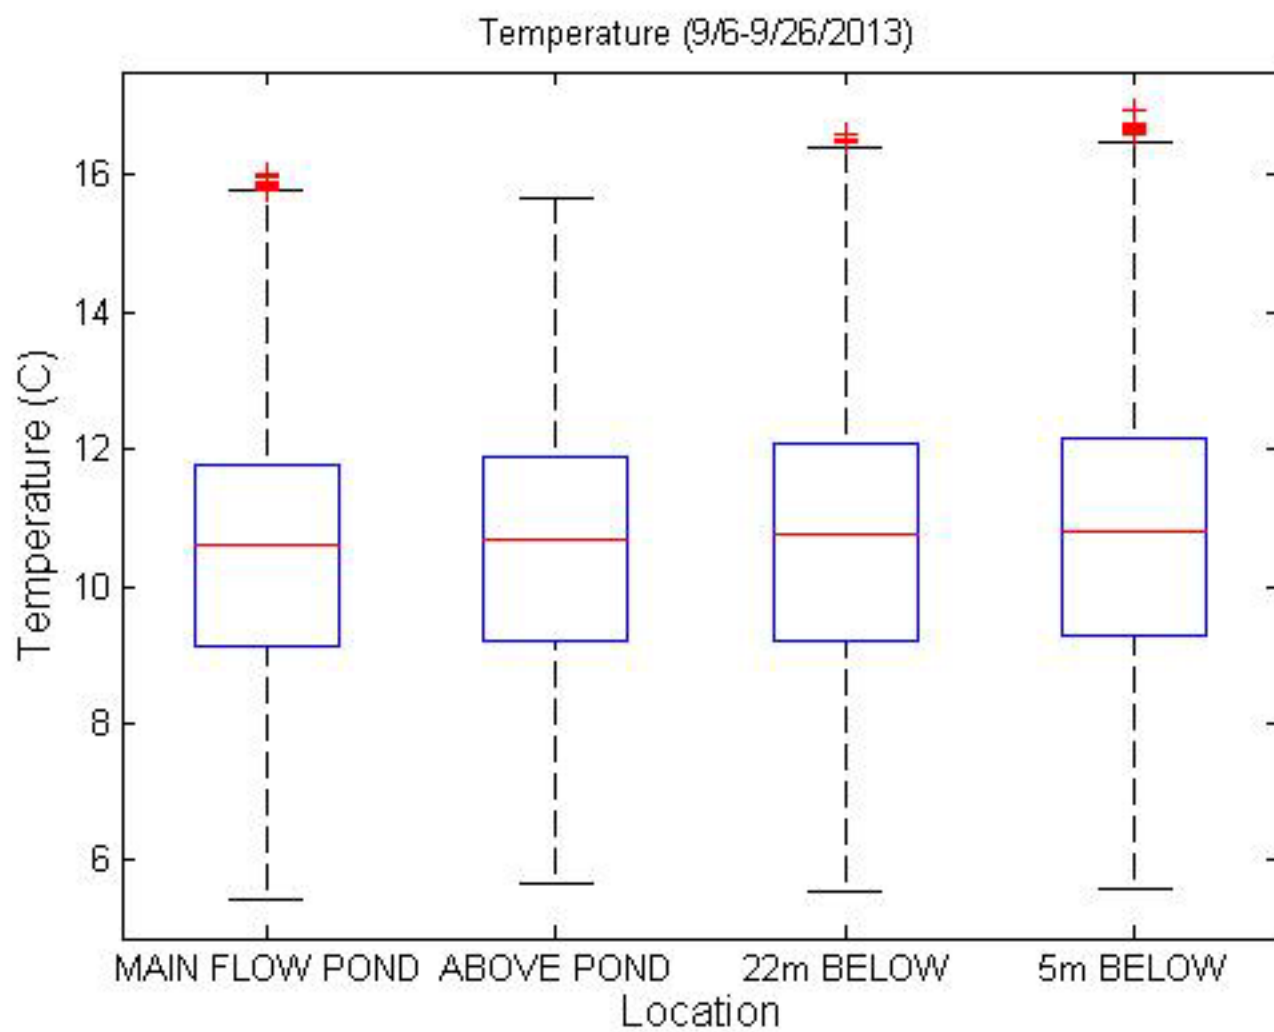

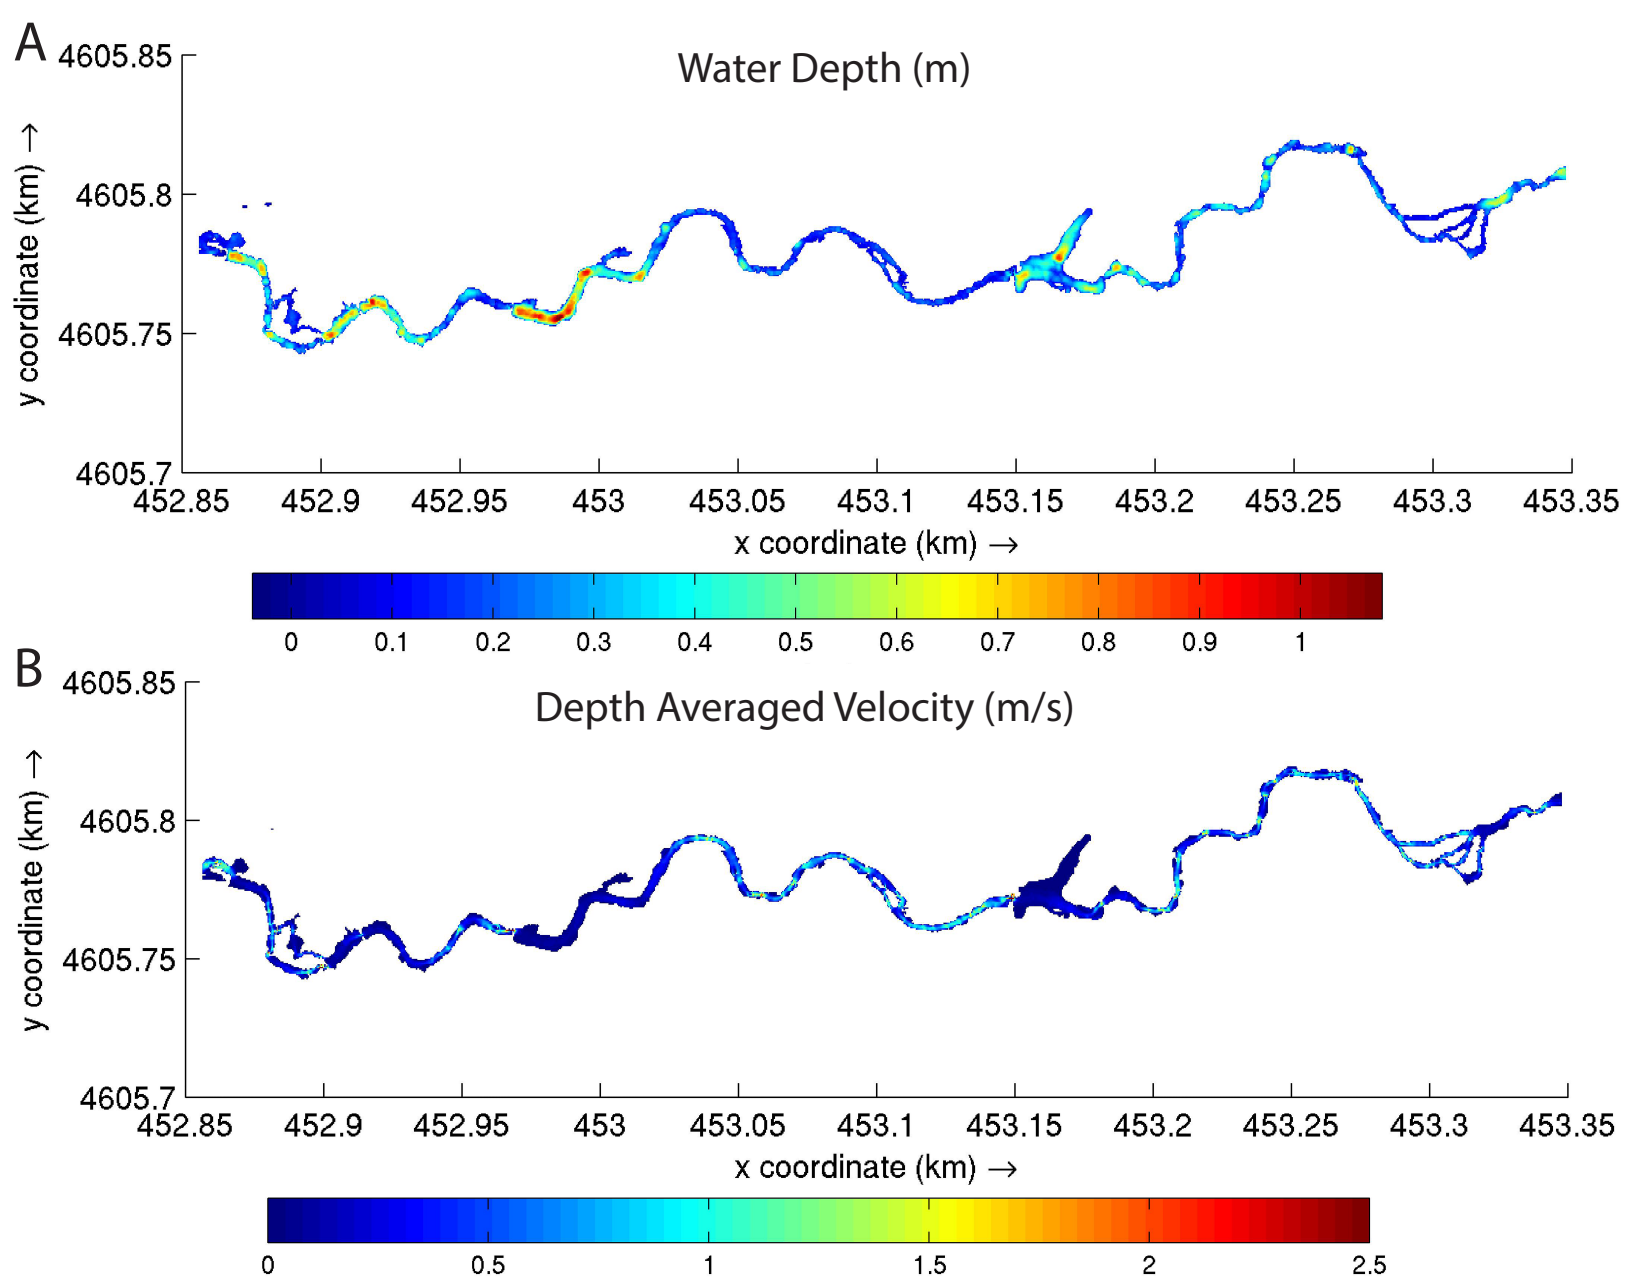

SI Figure 5

Manning's  $n$

0.01

0.03

0.04

0.065

0.1

0.001

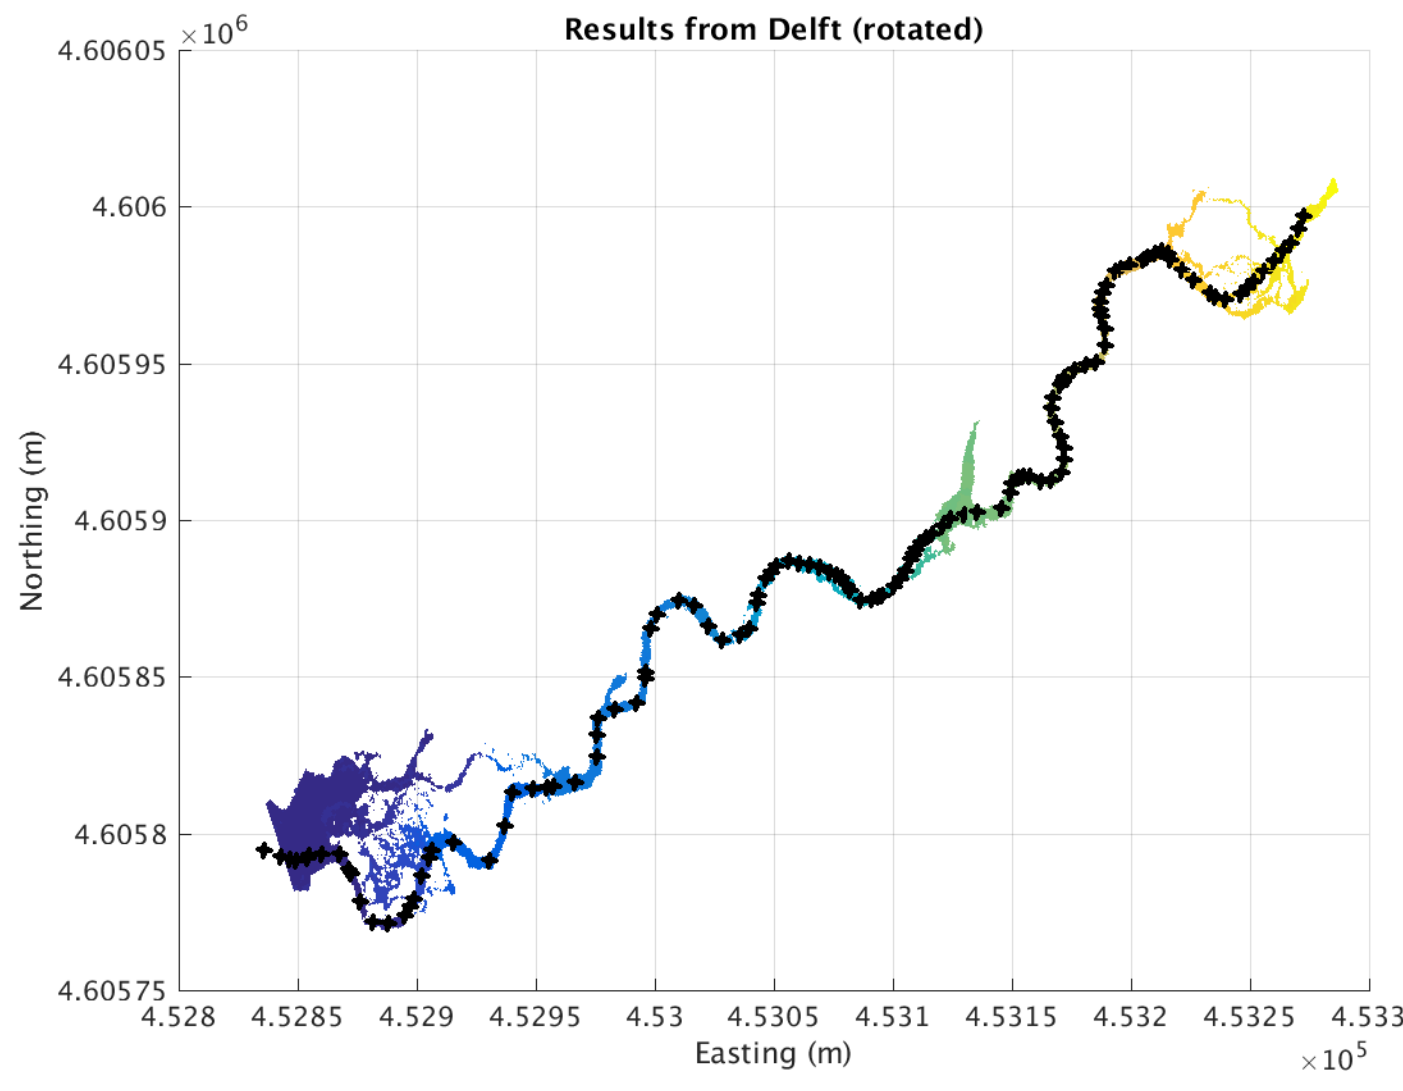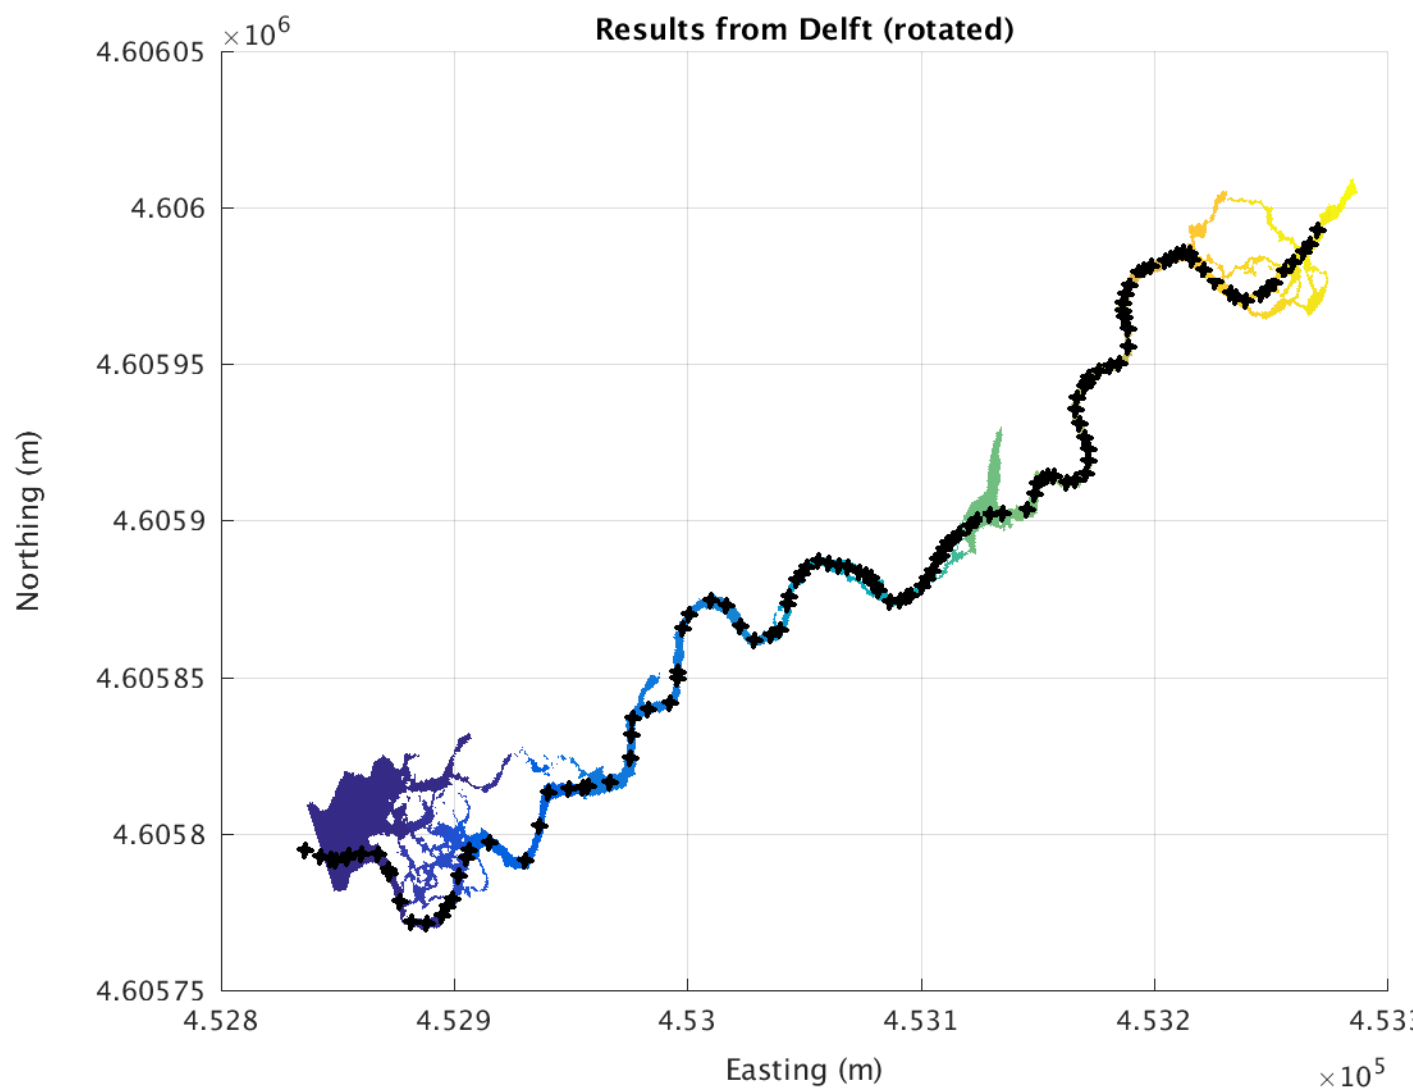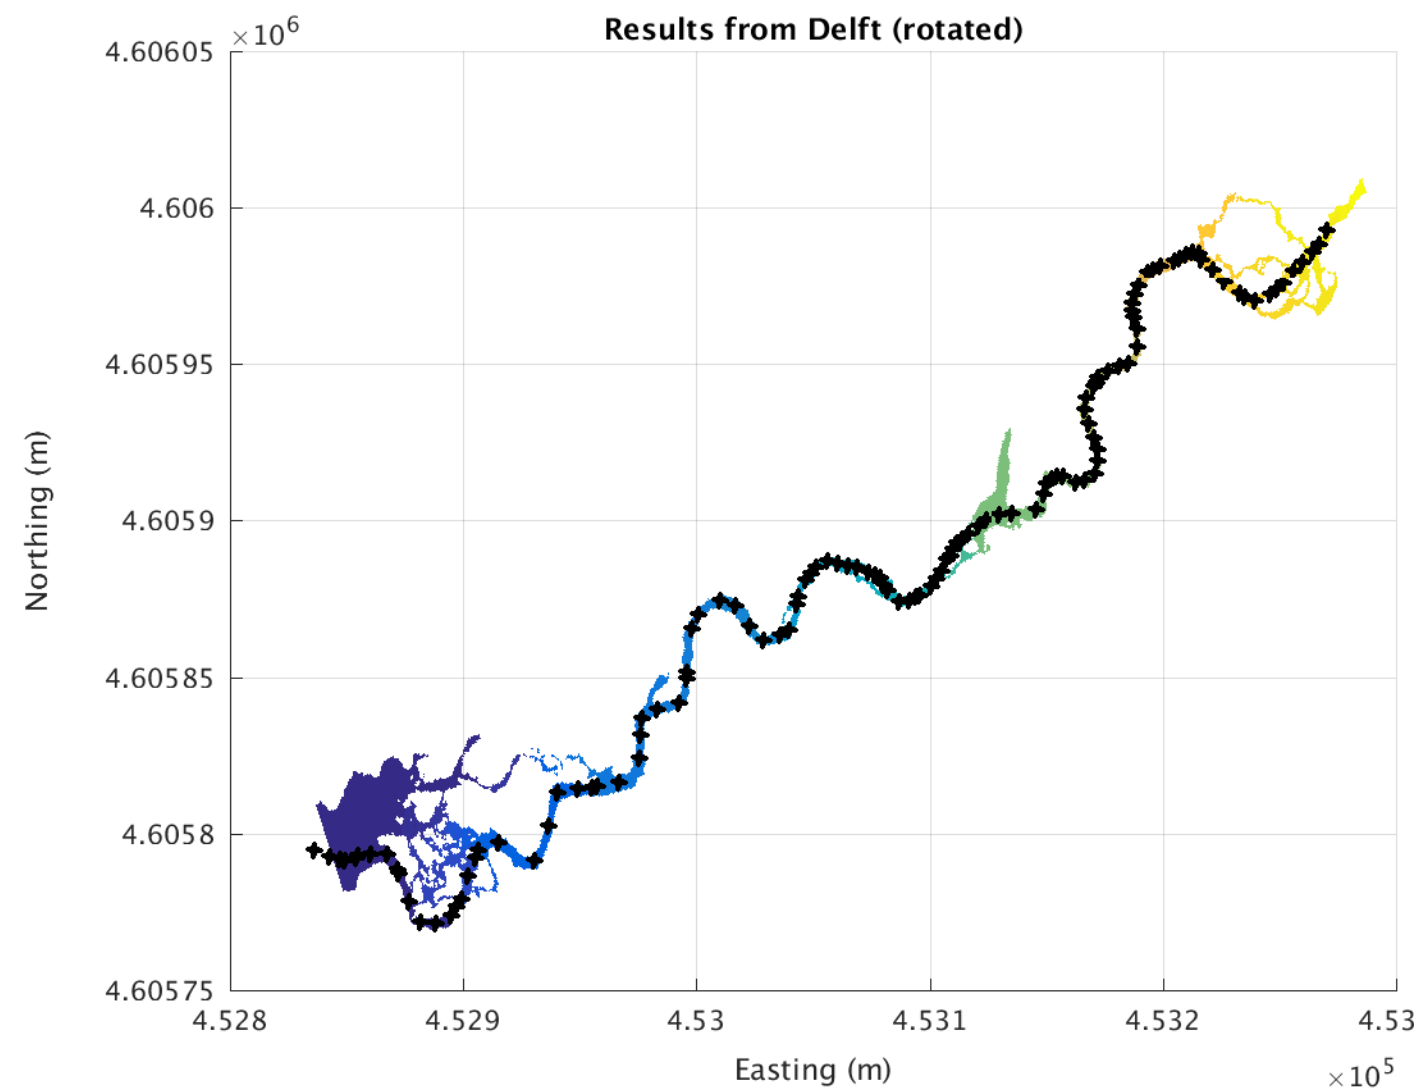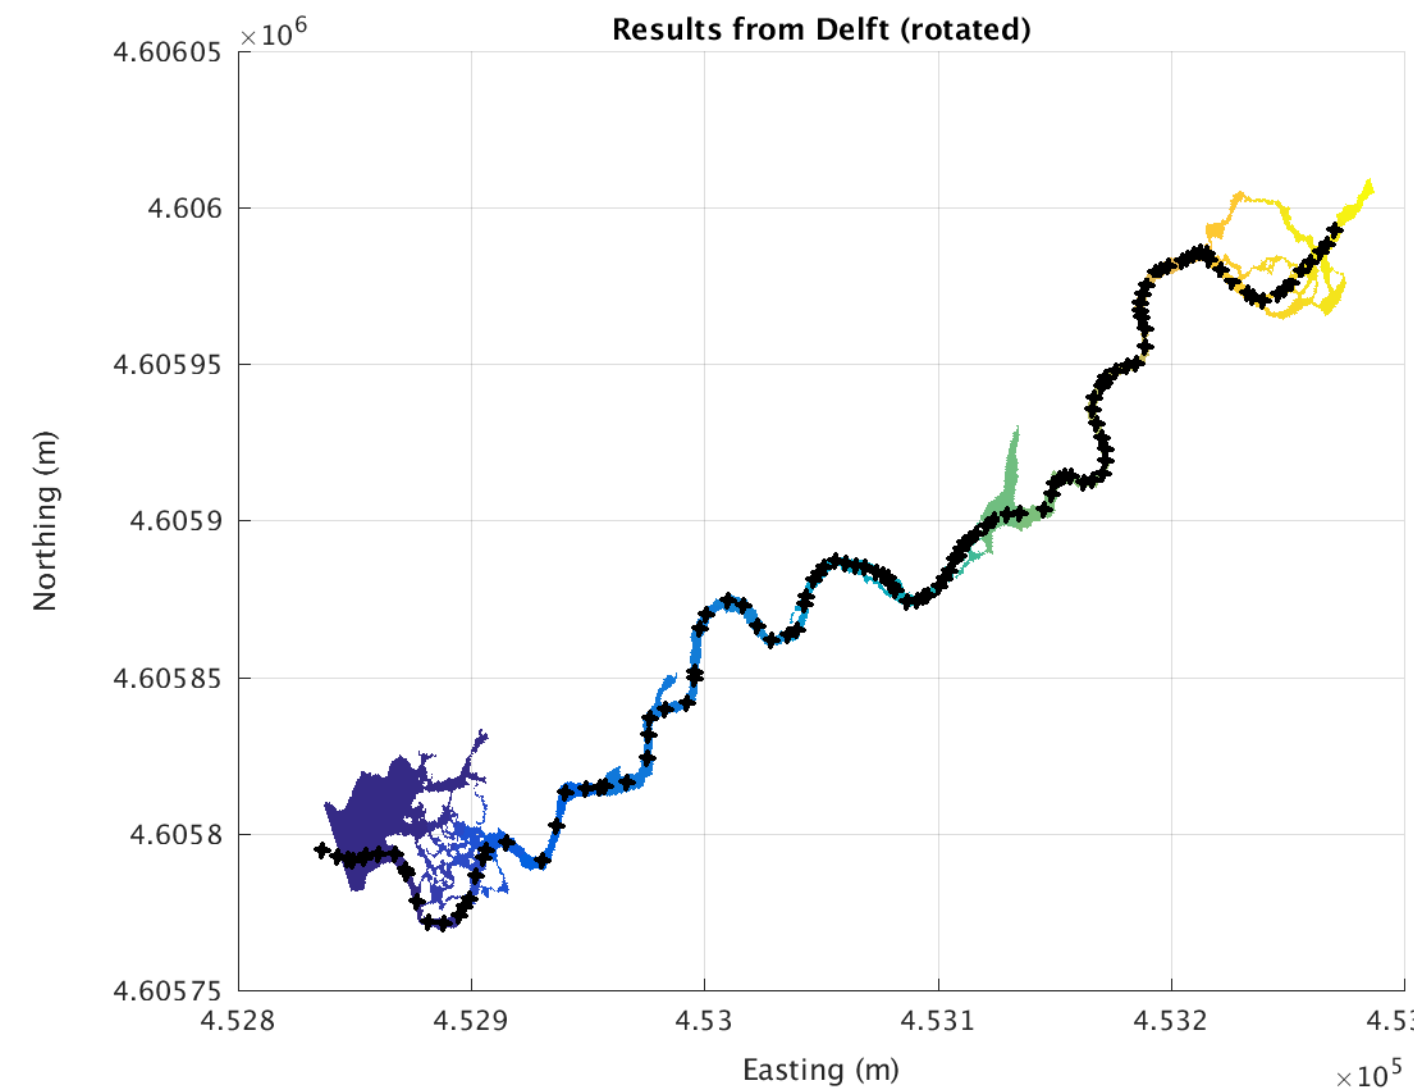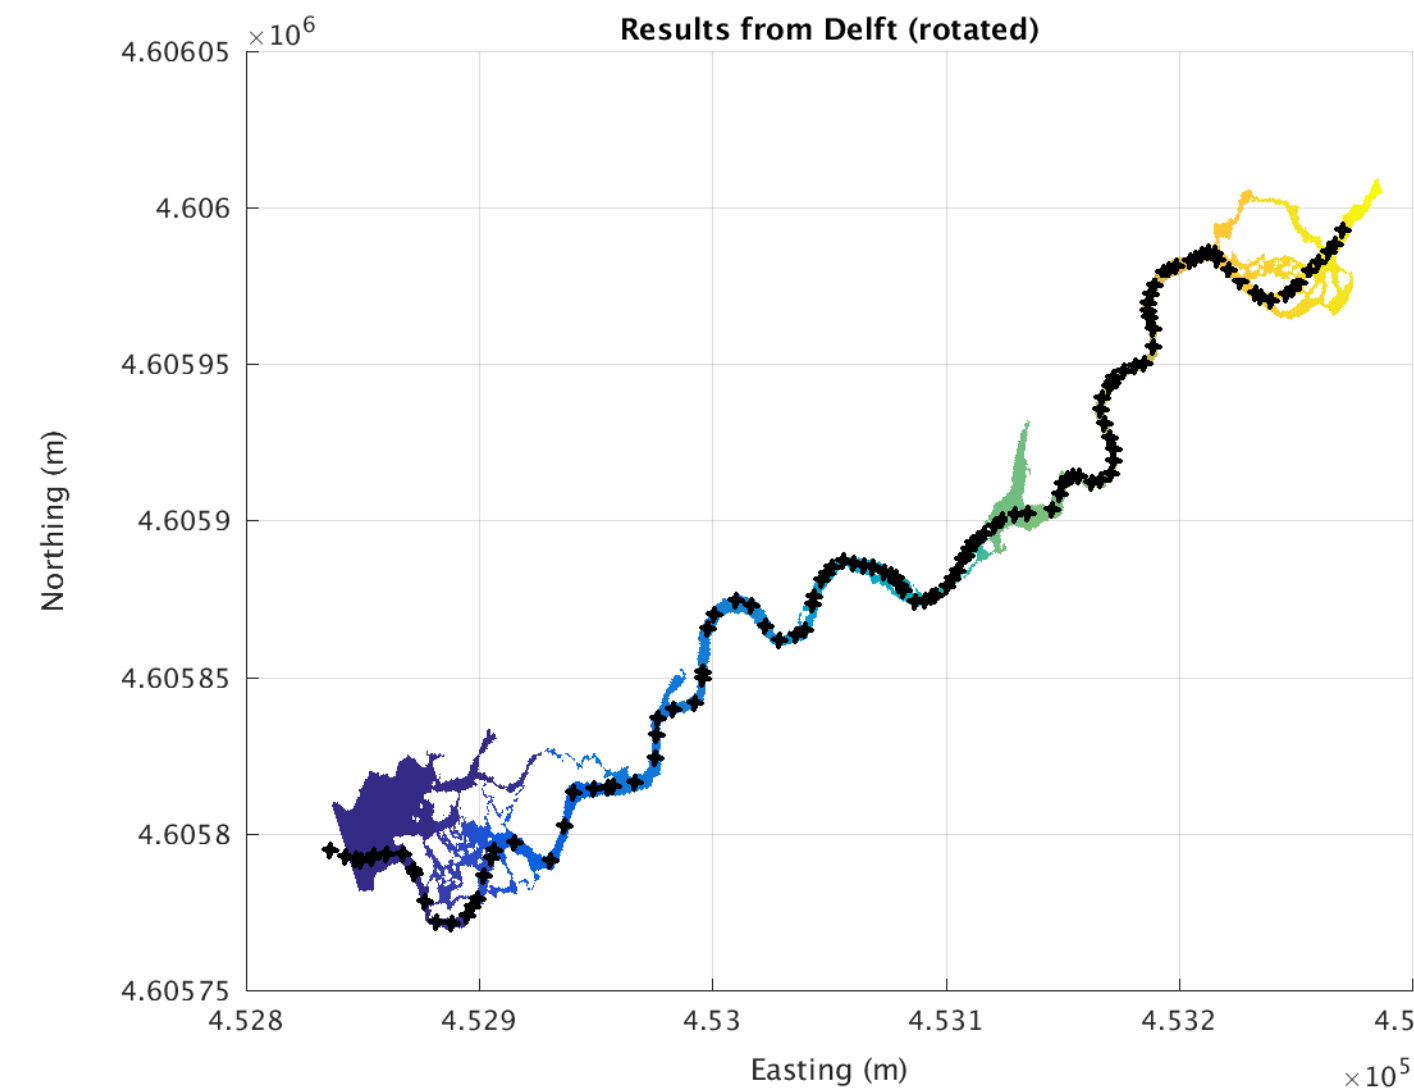

0.01

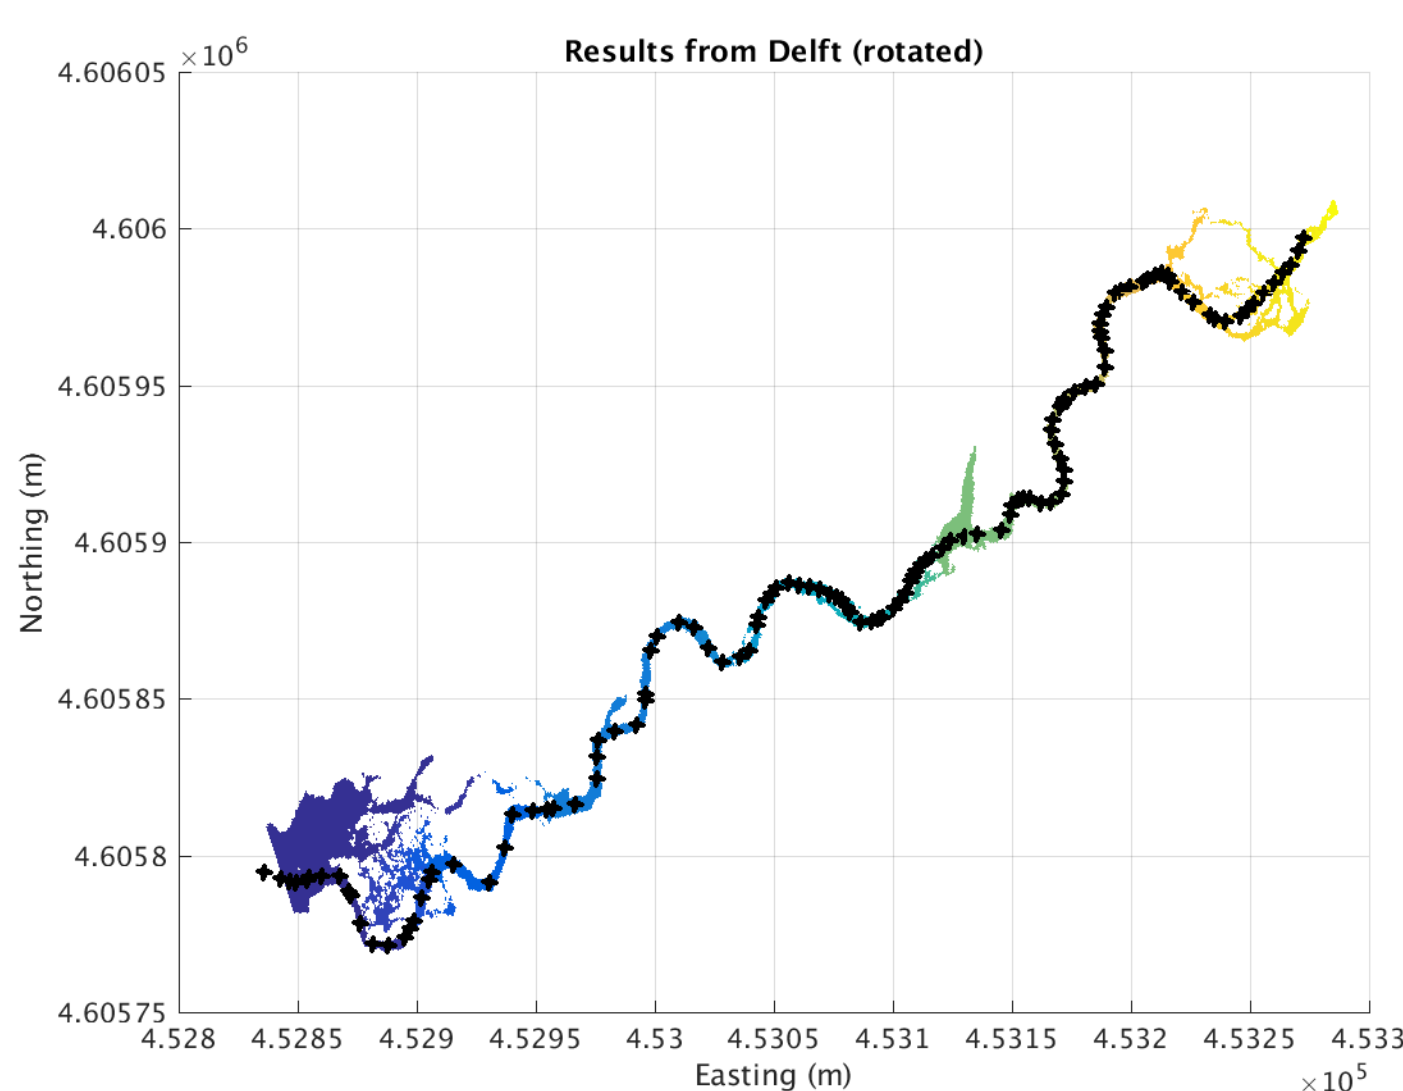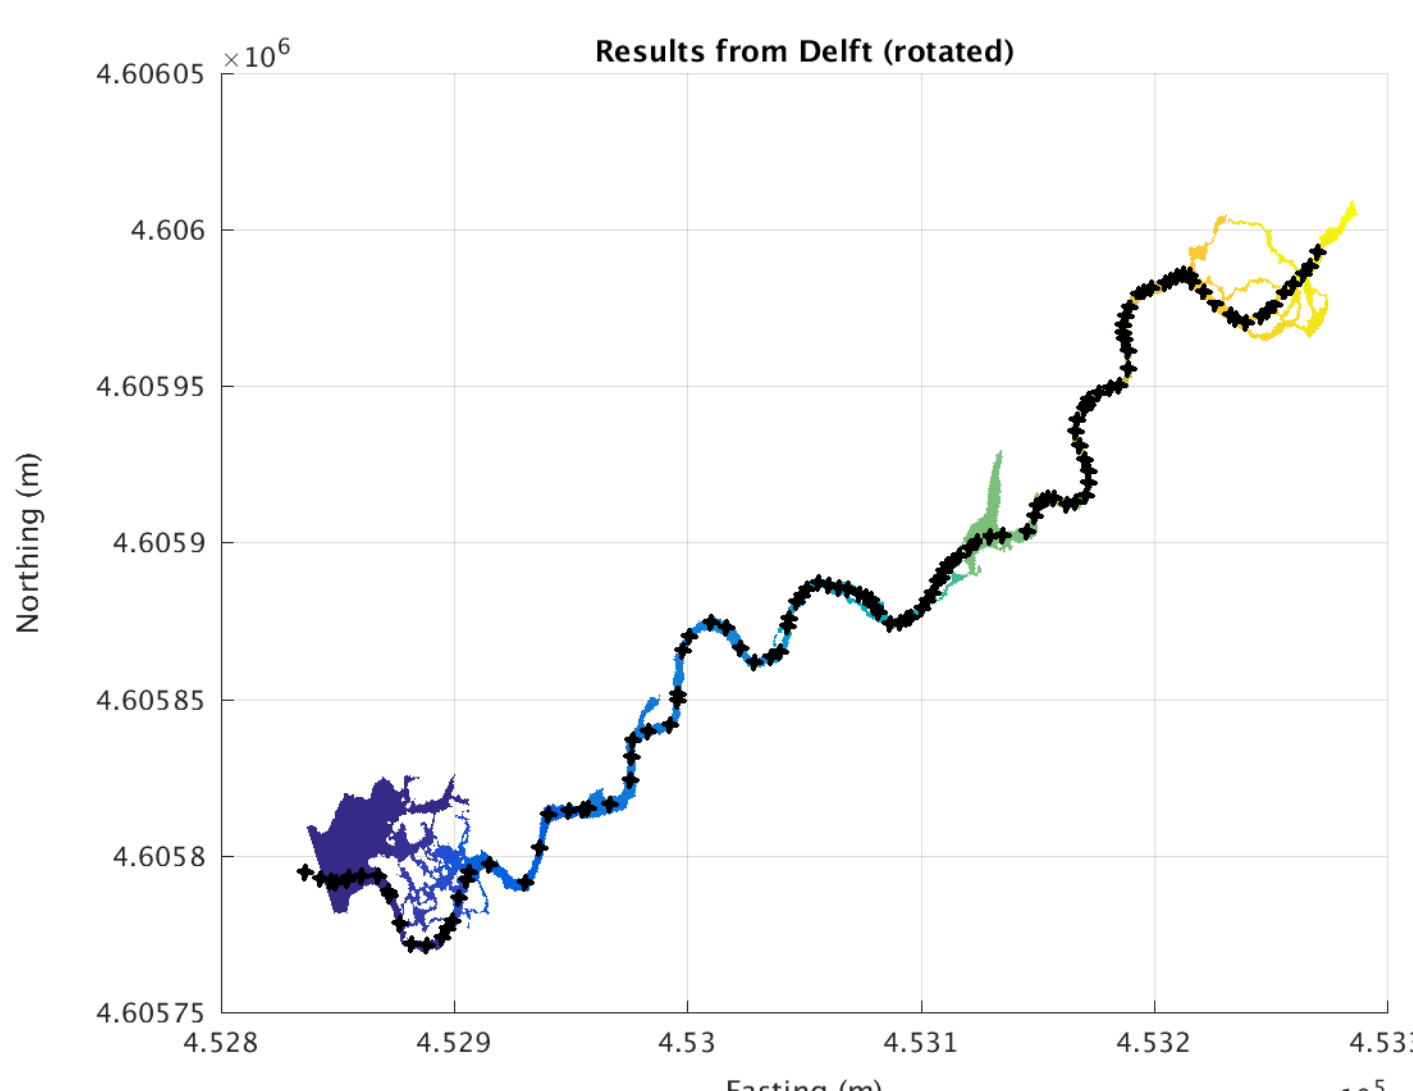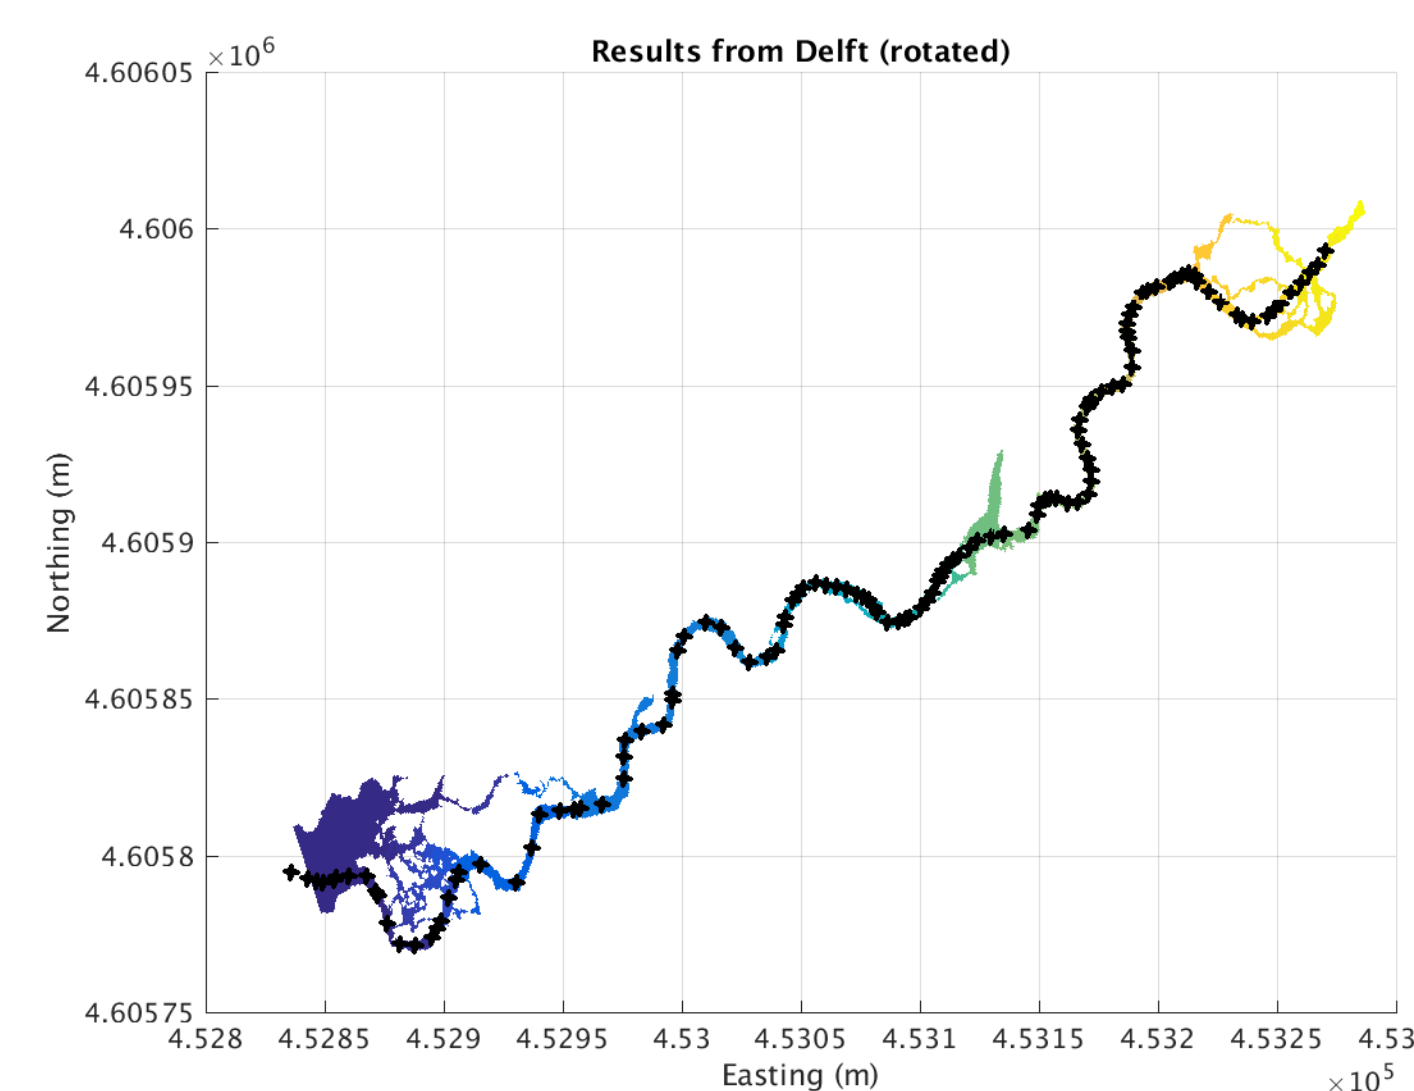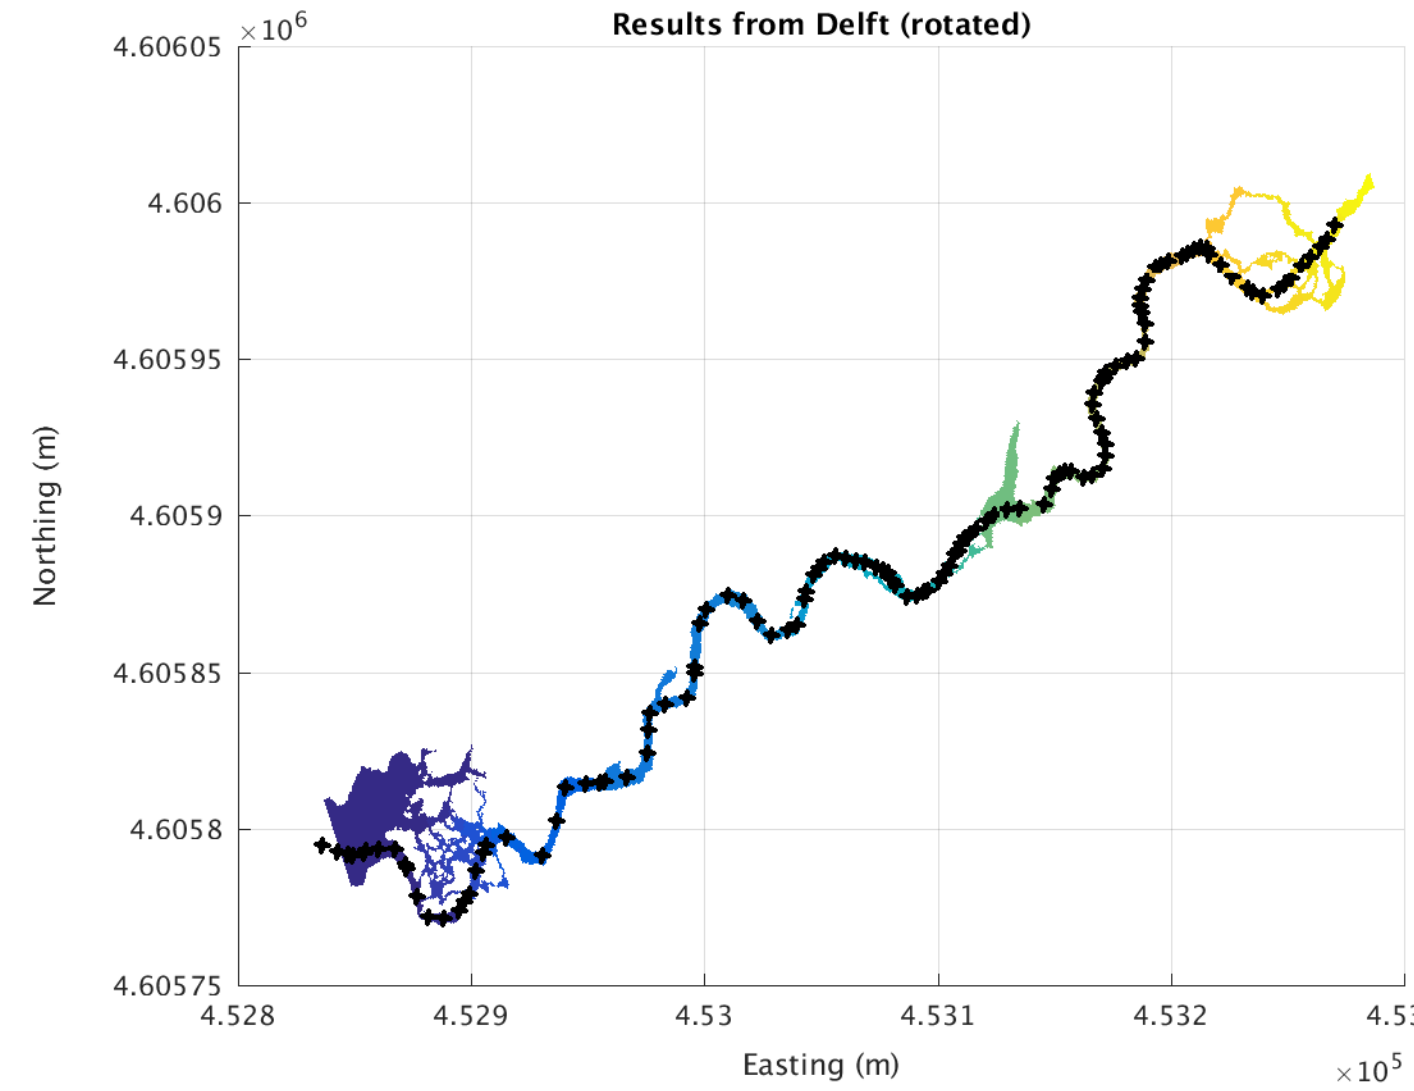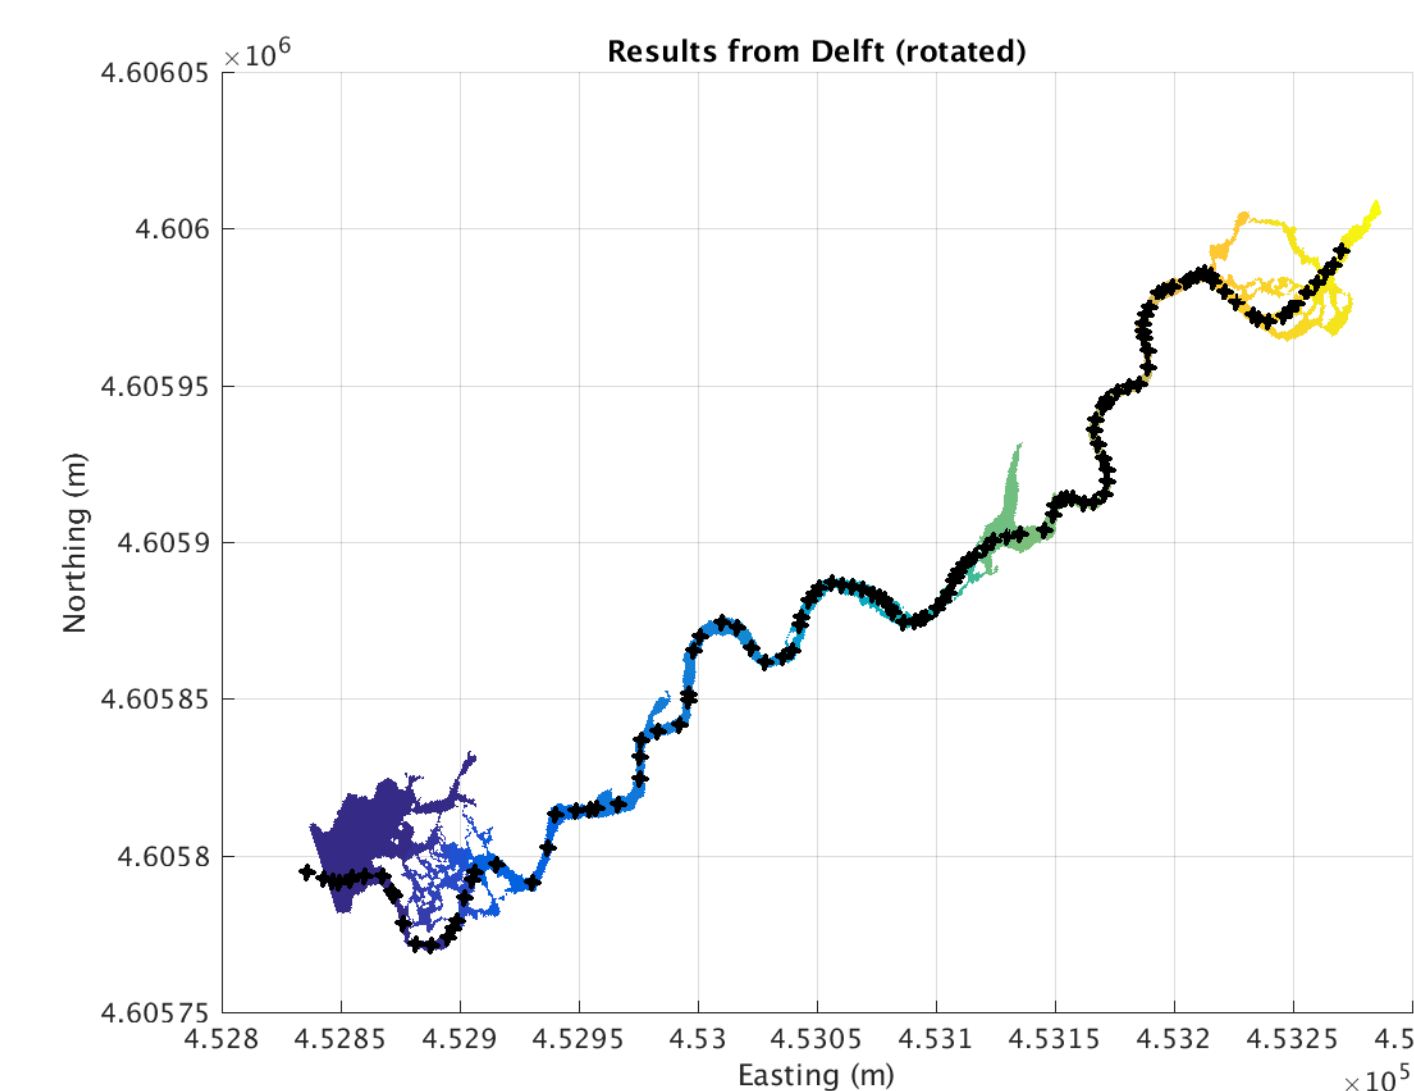

0.1

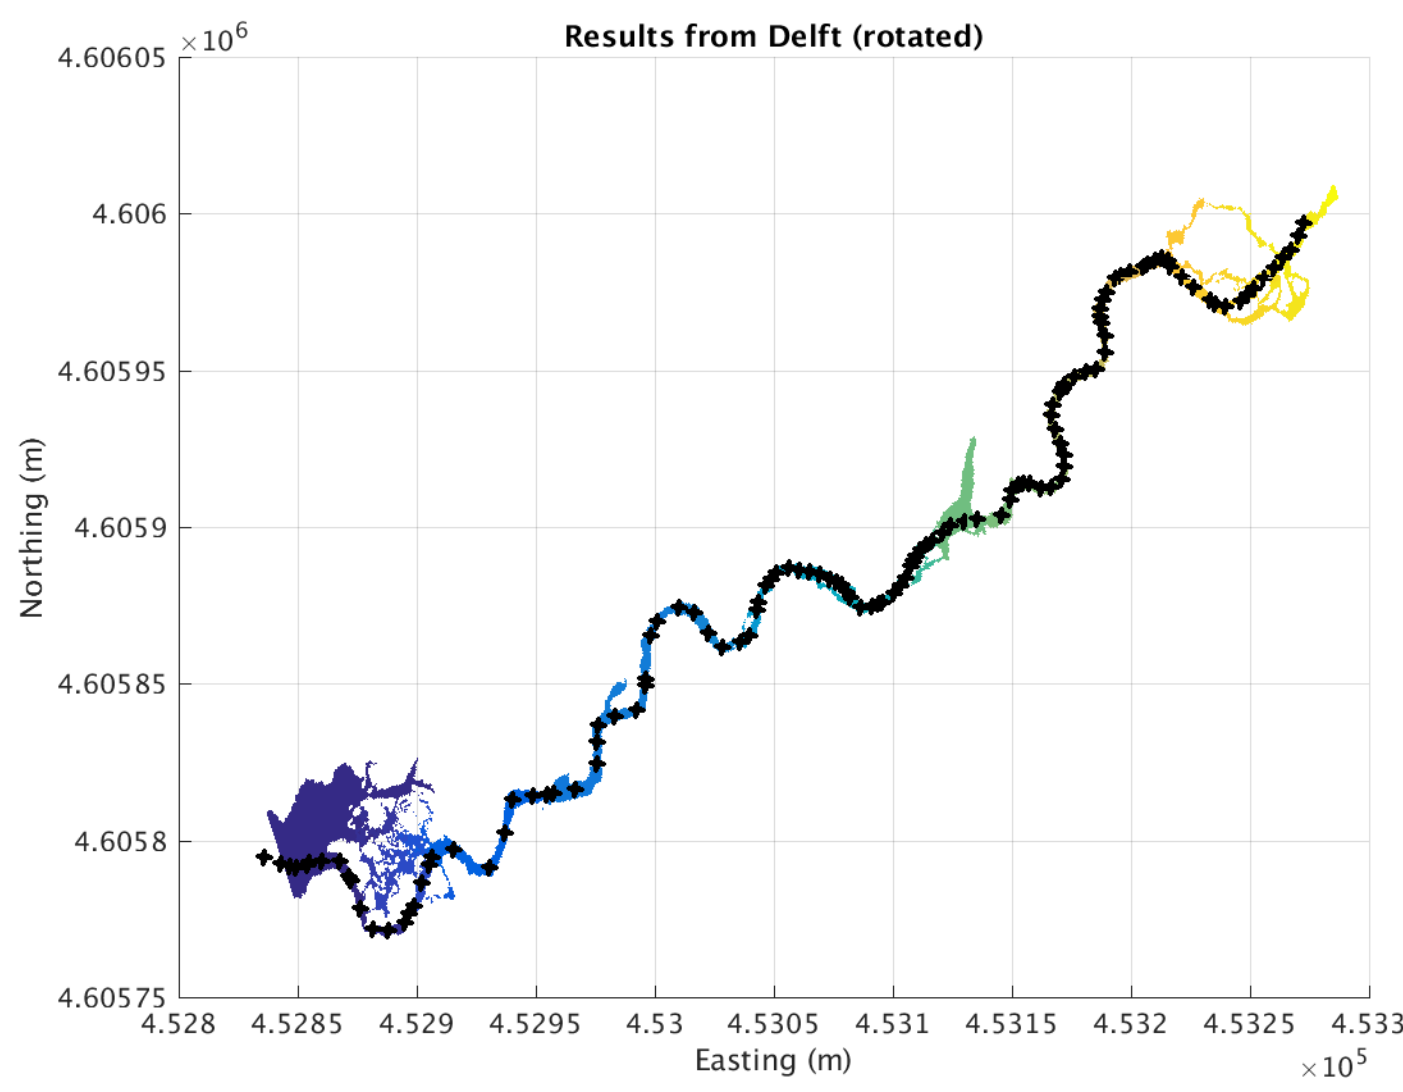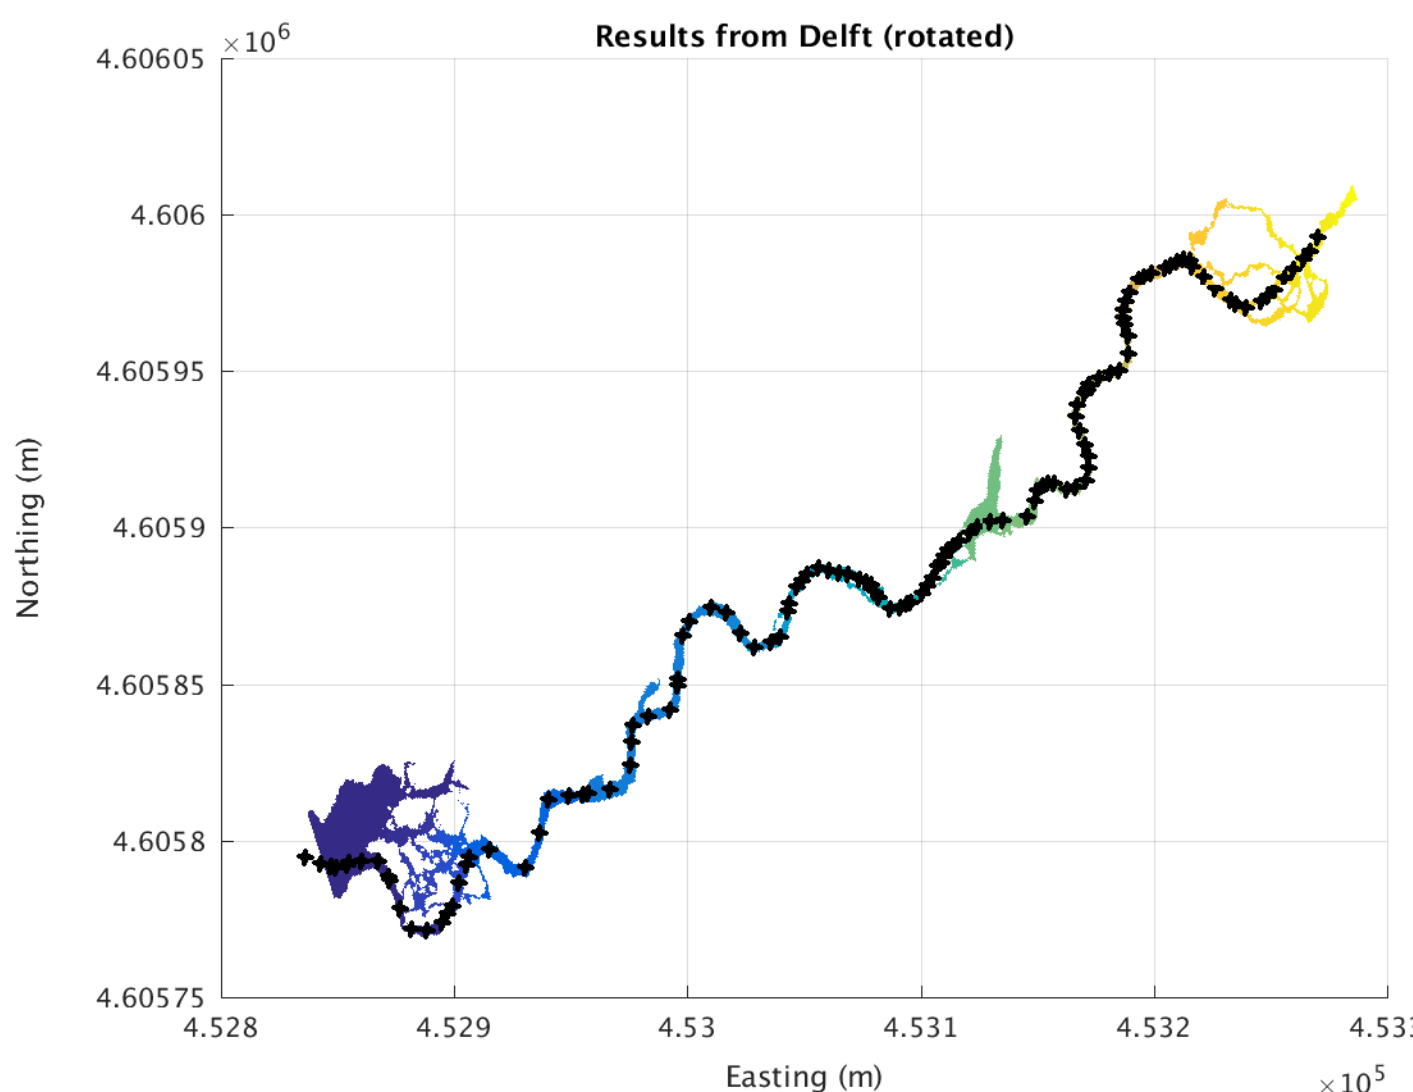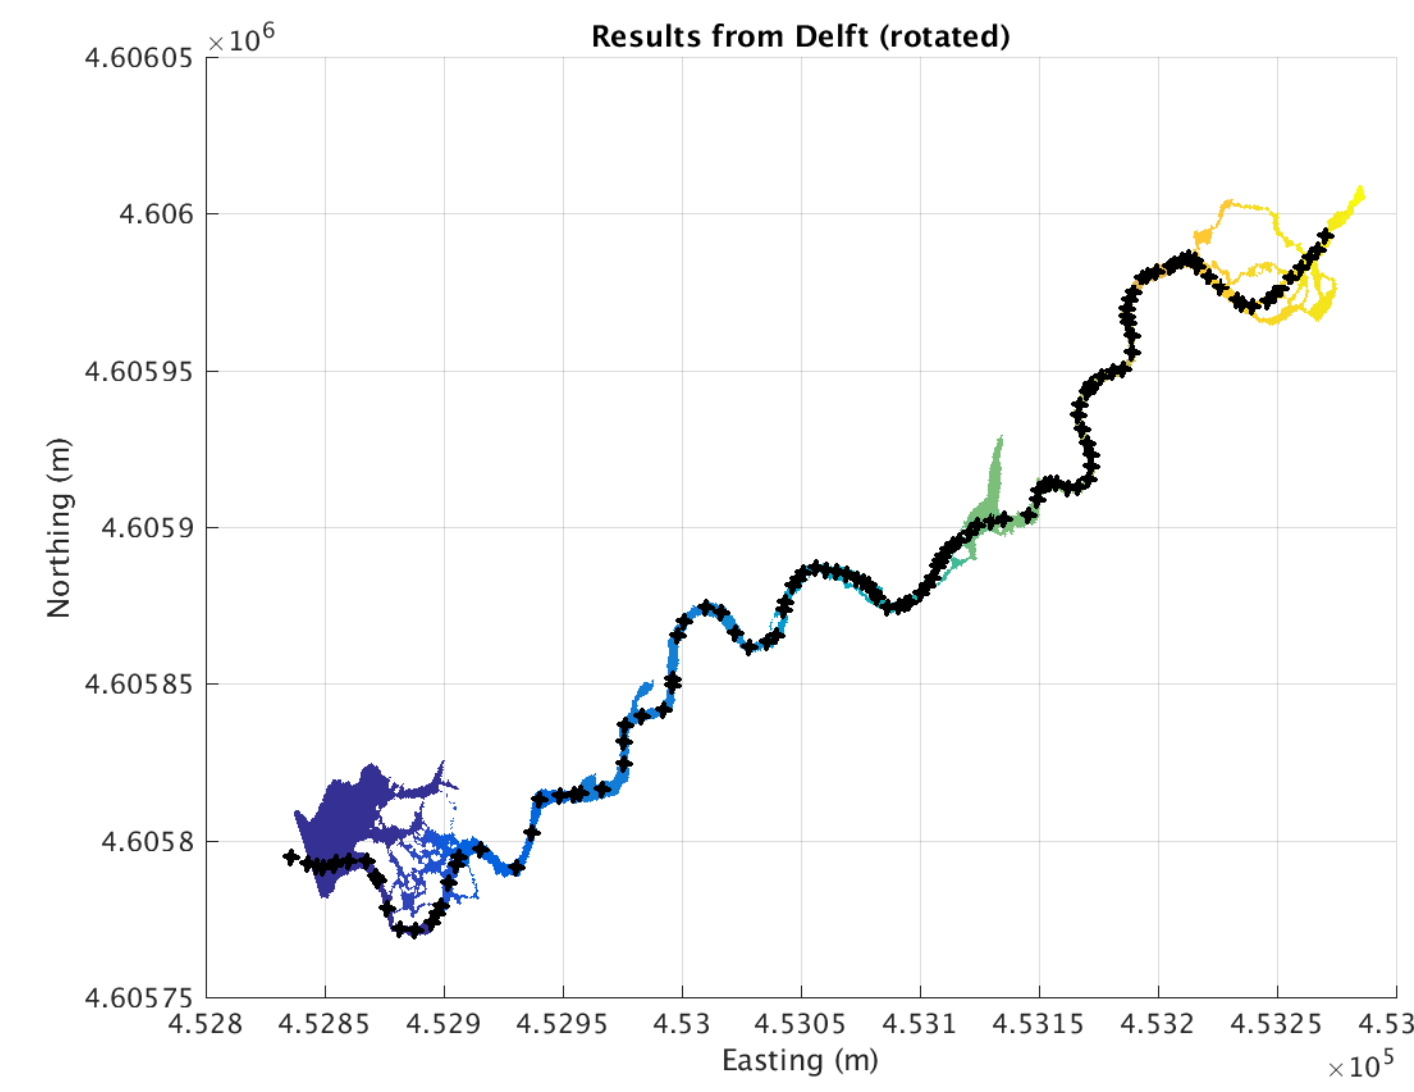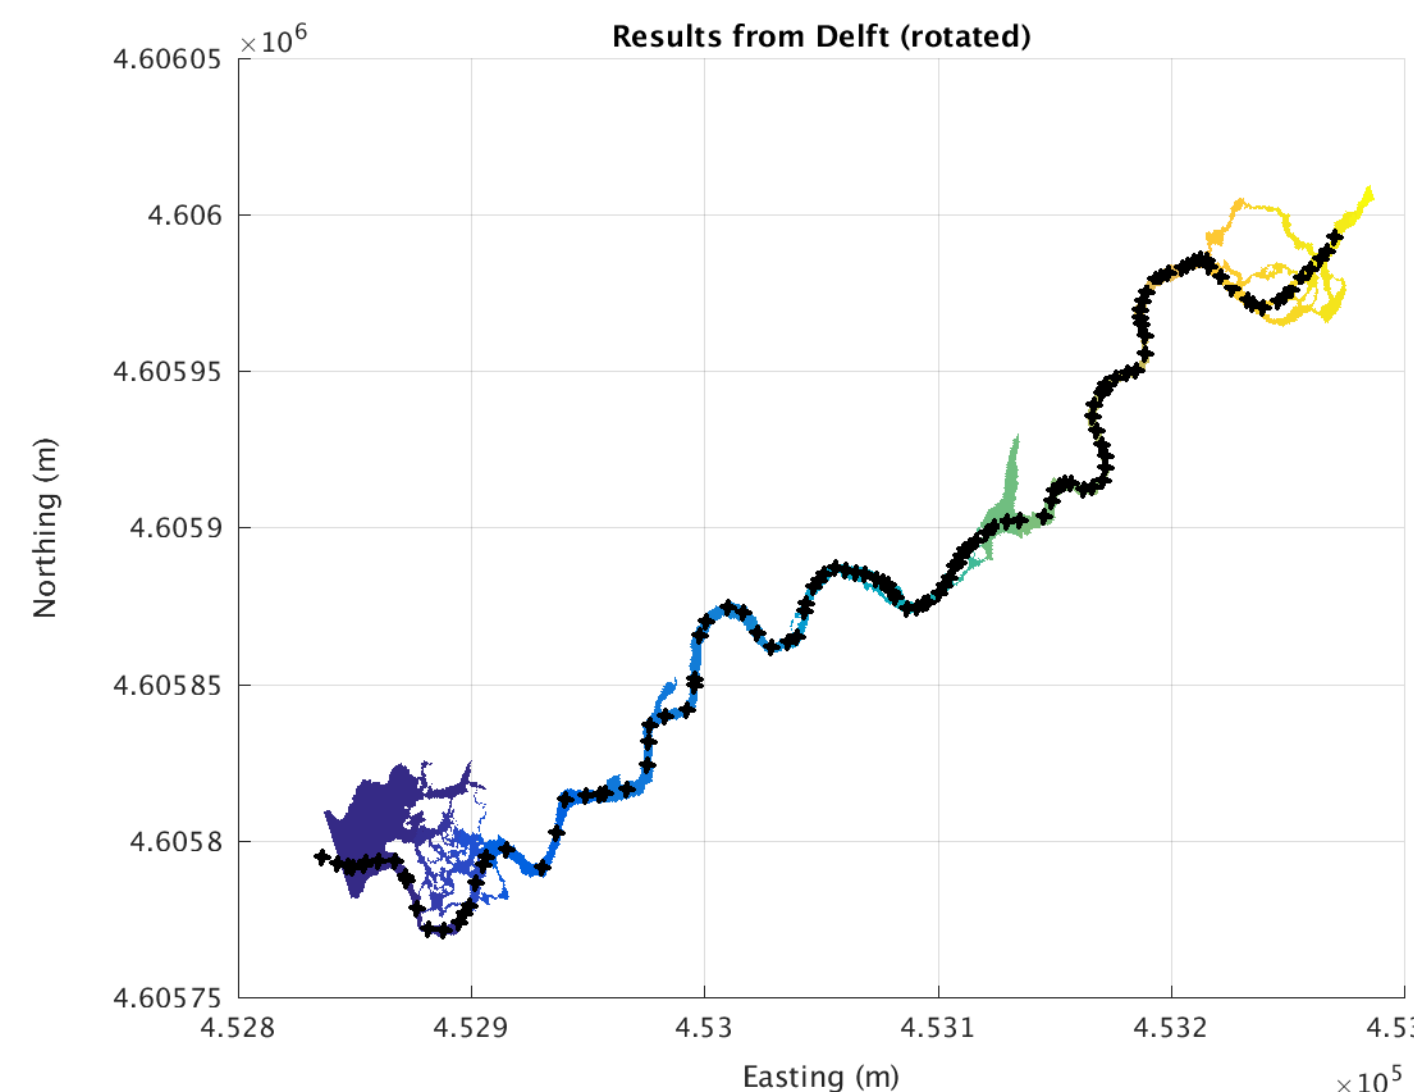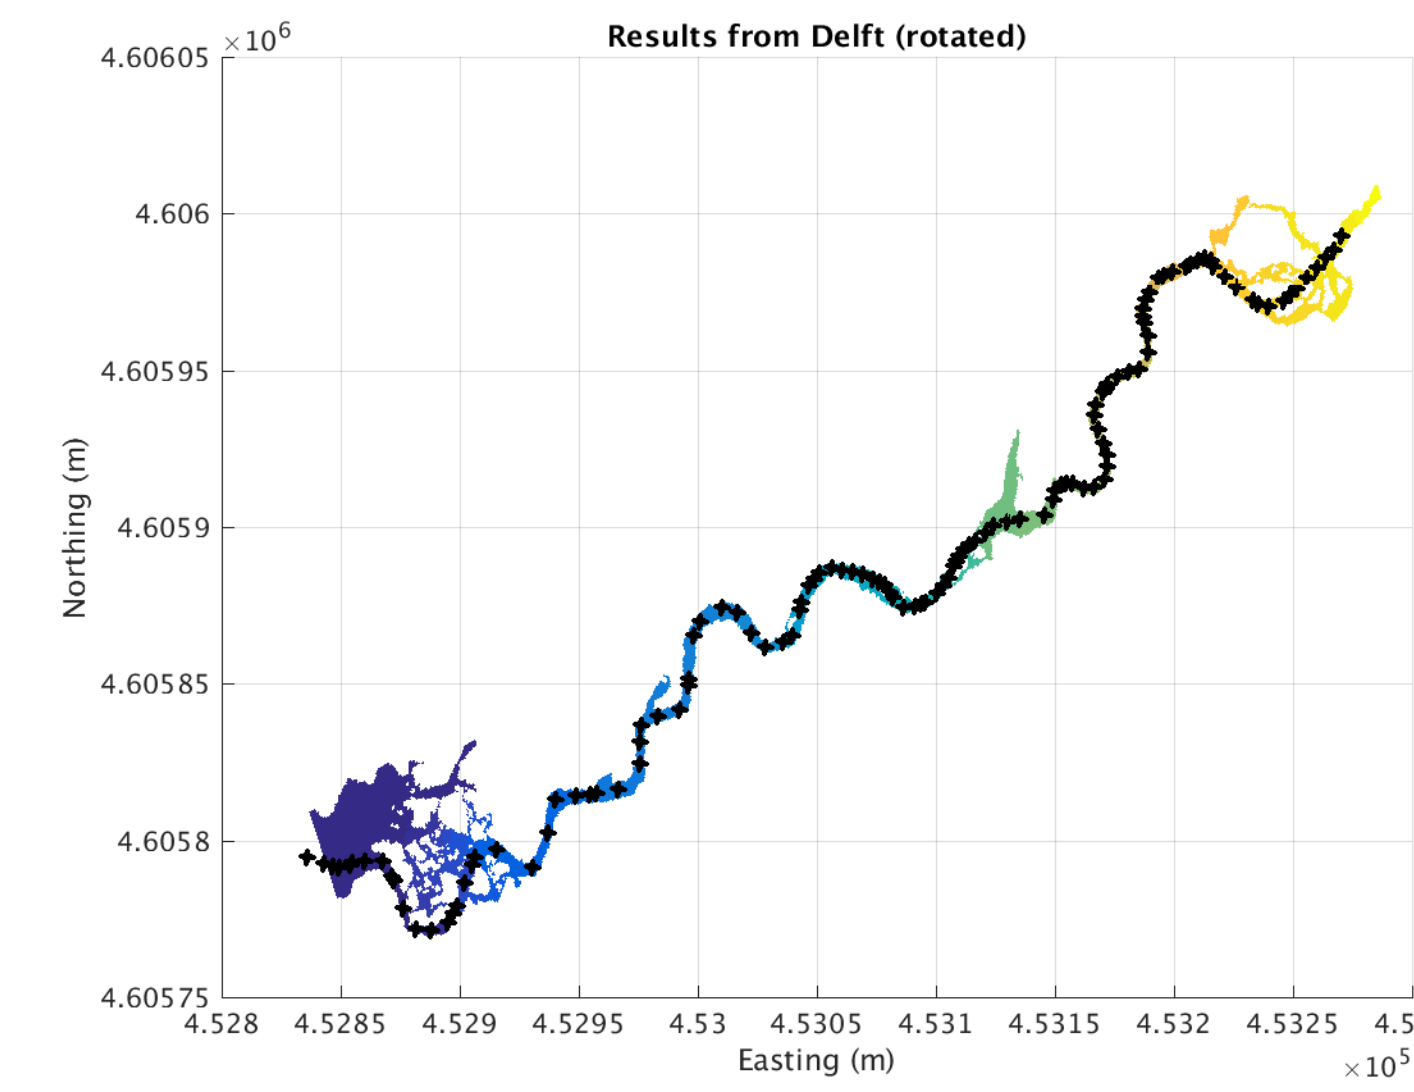

1.0

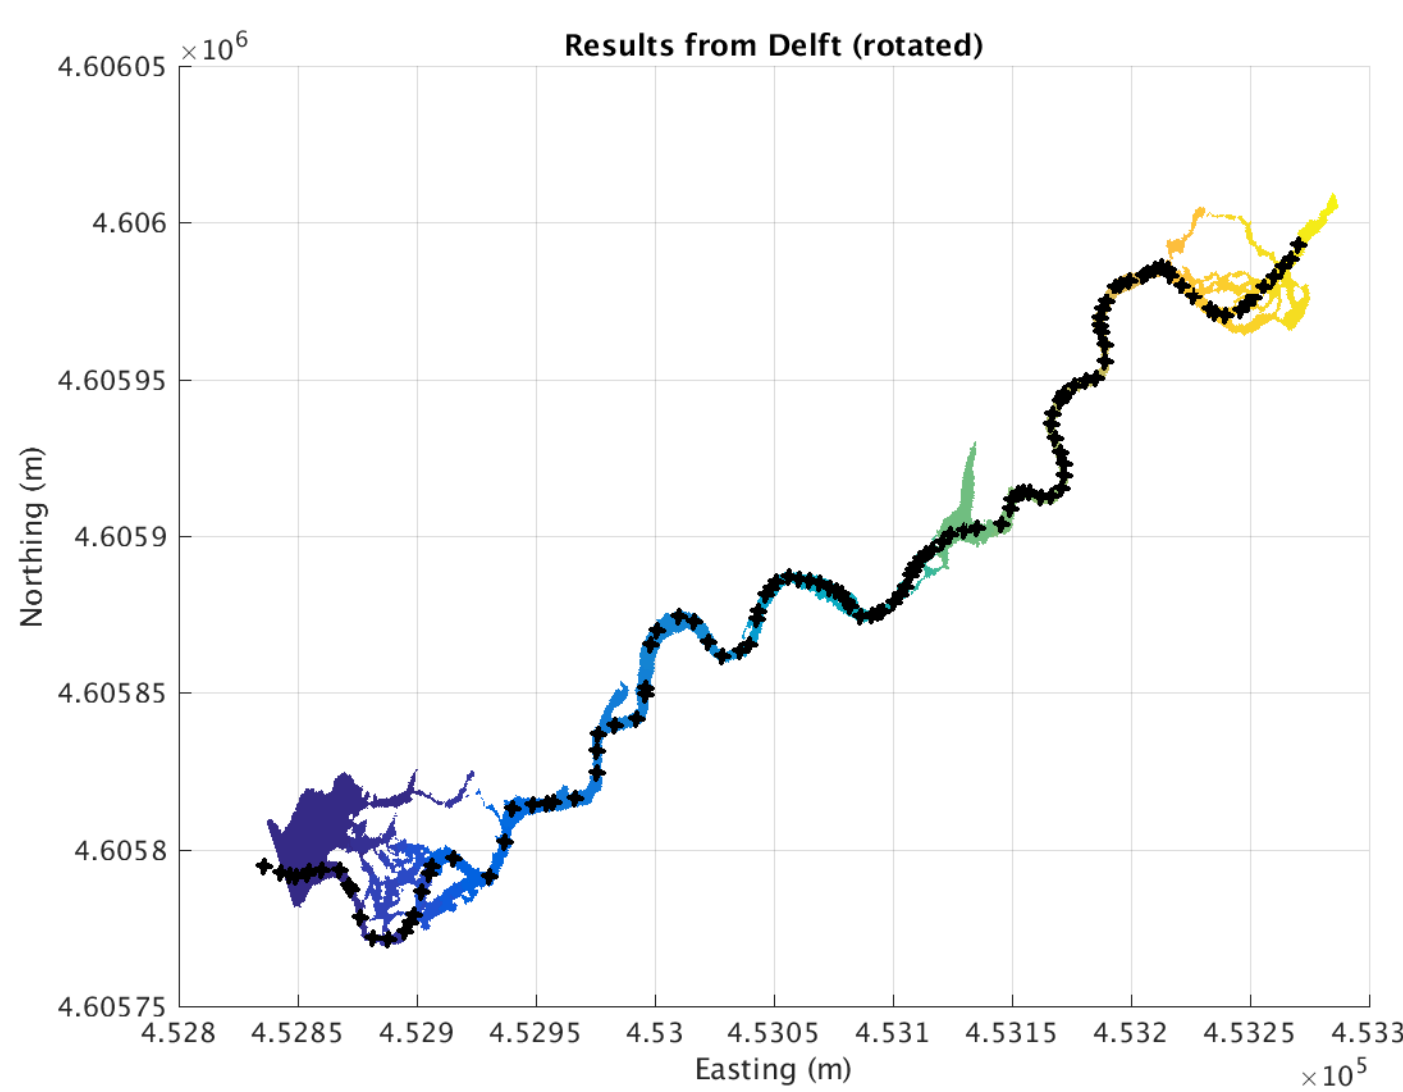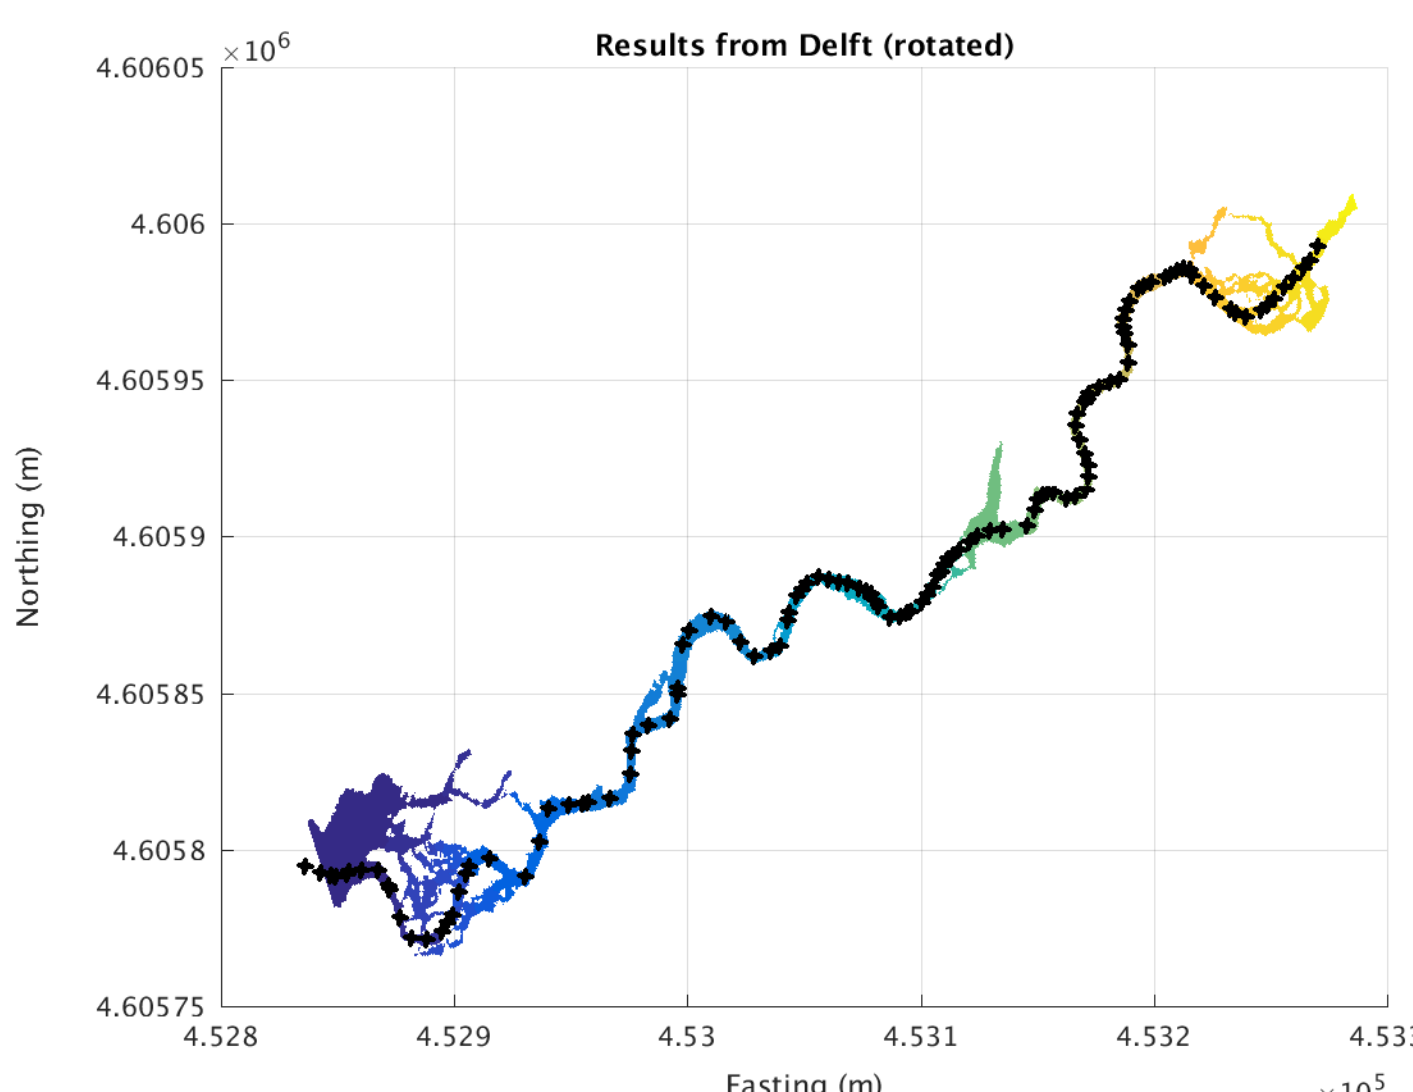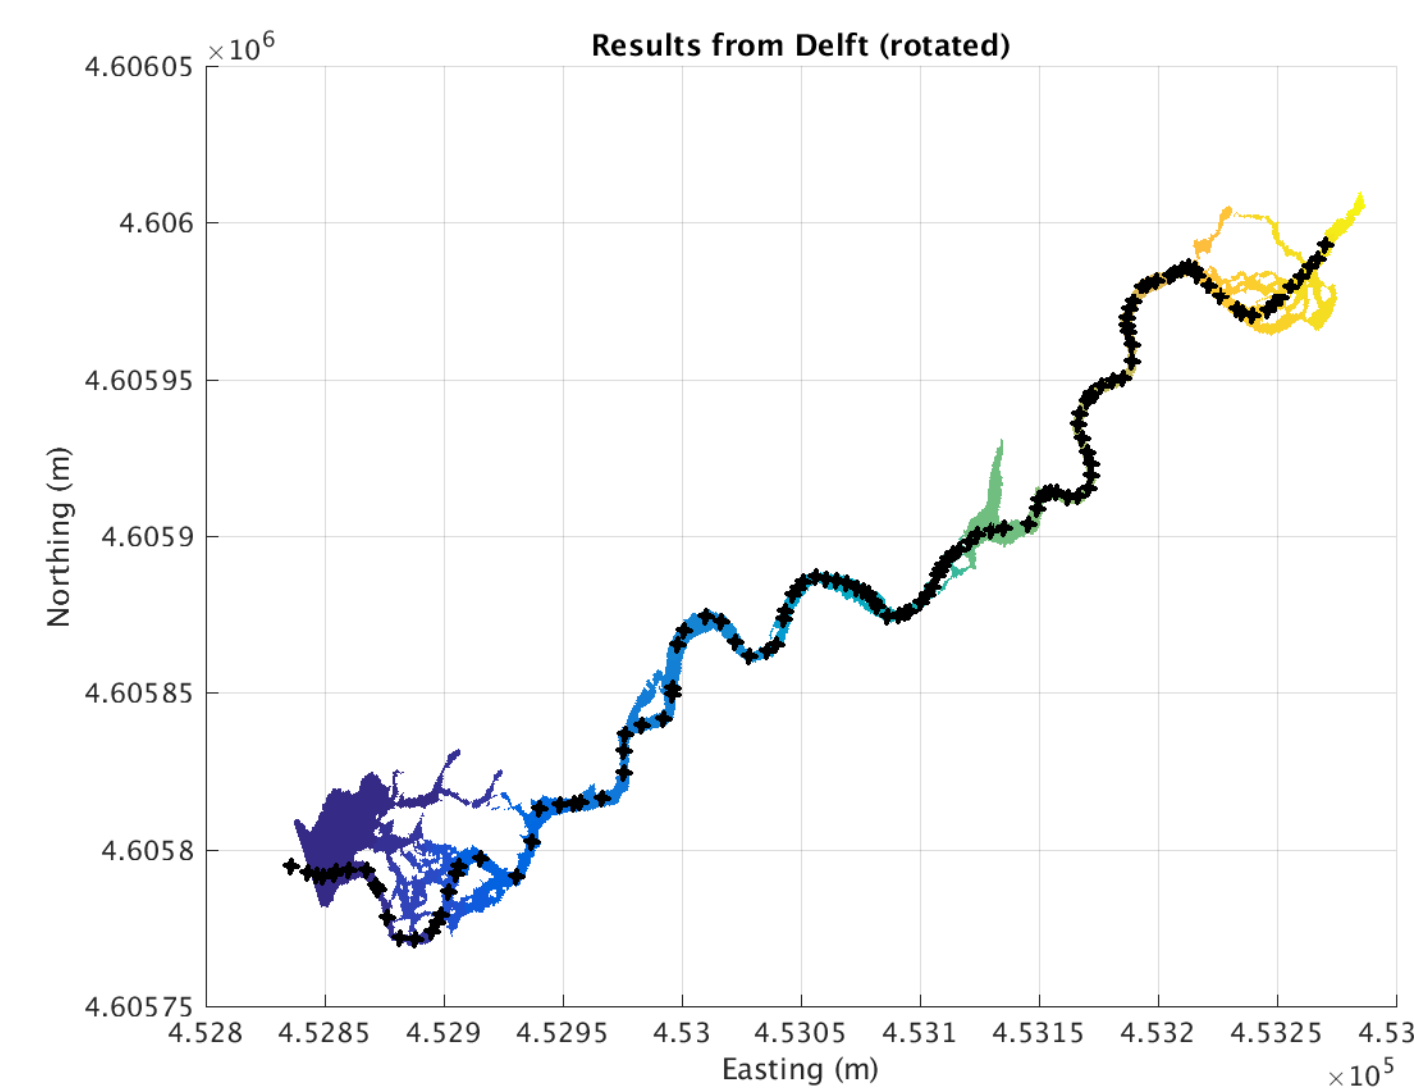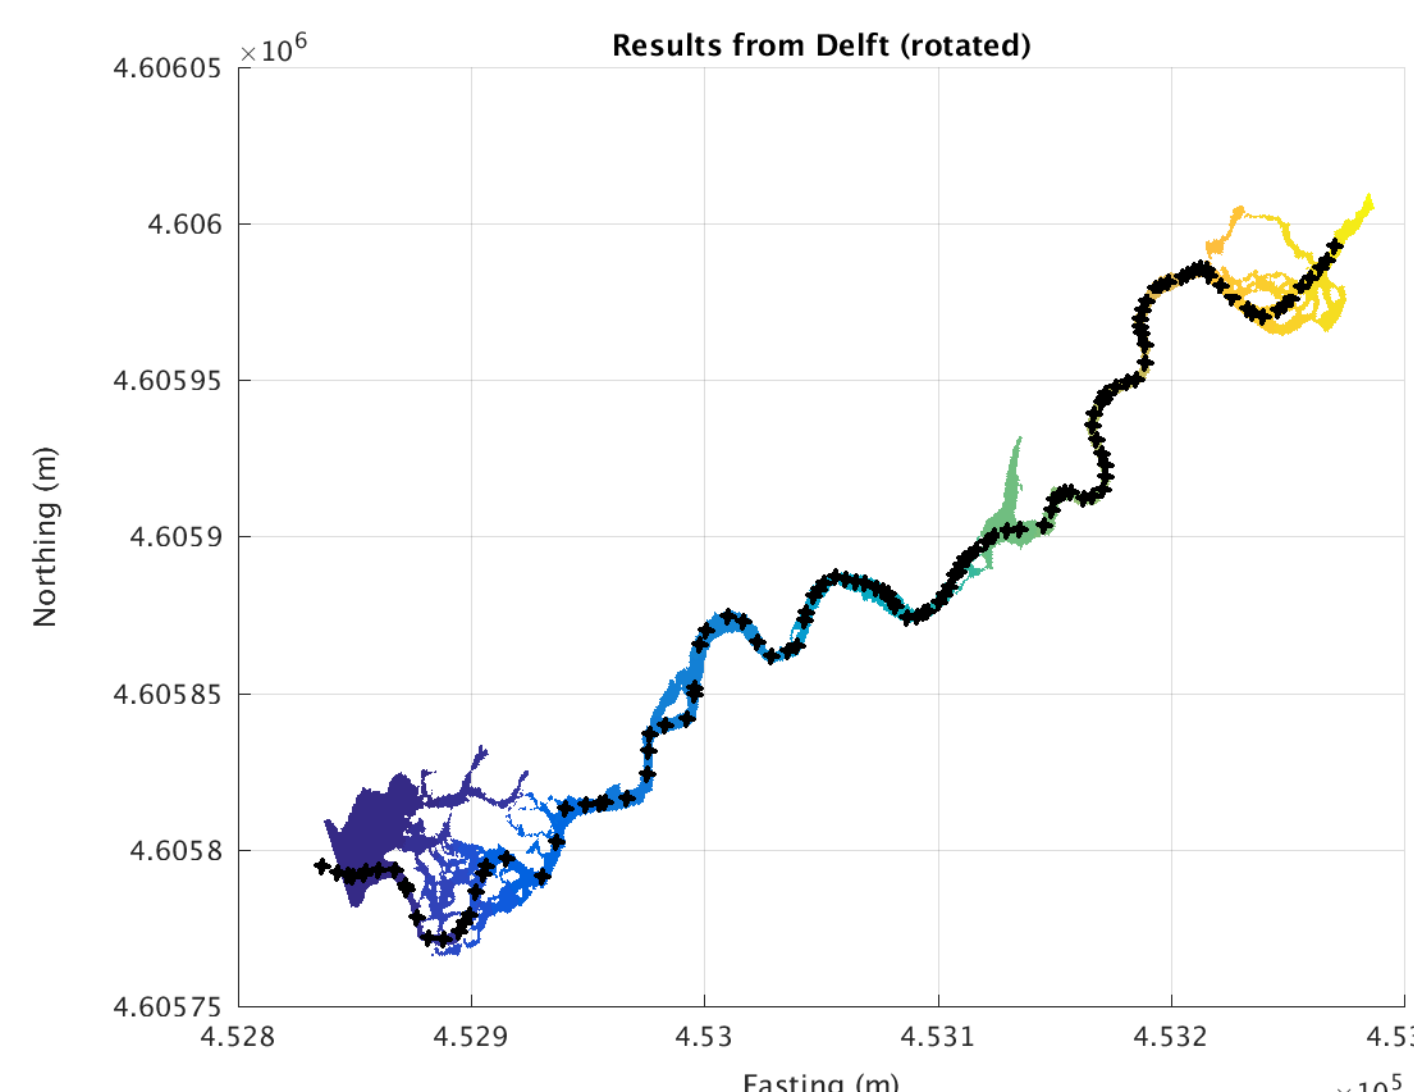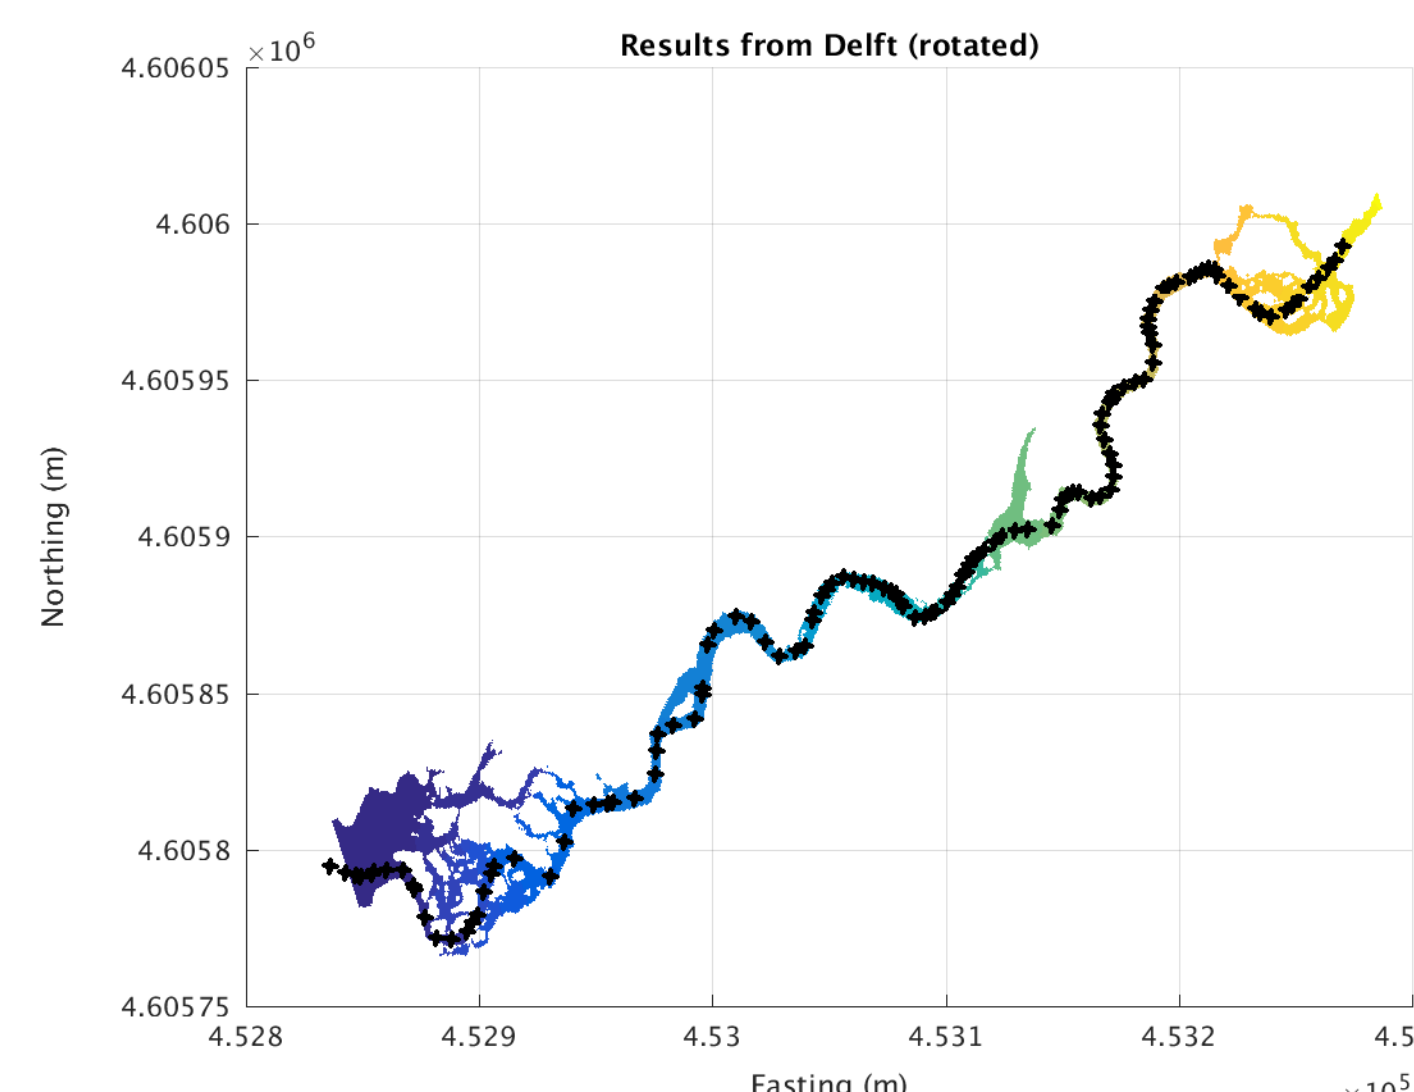

10.0

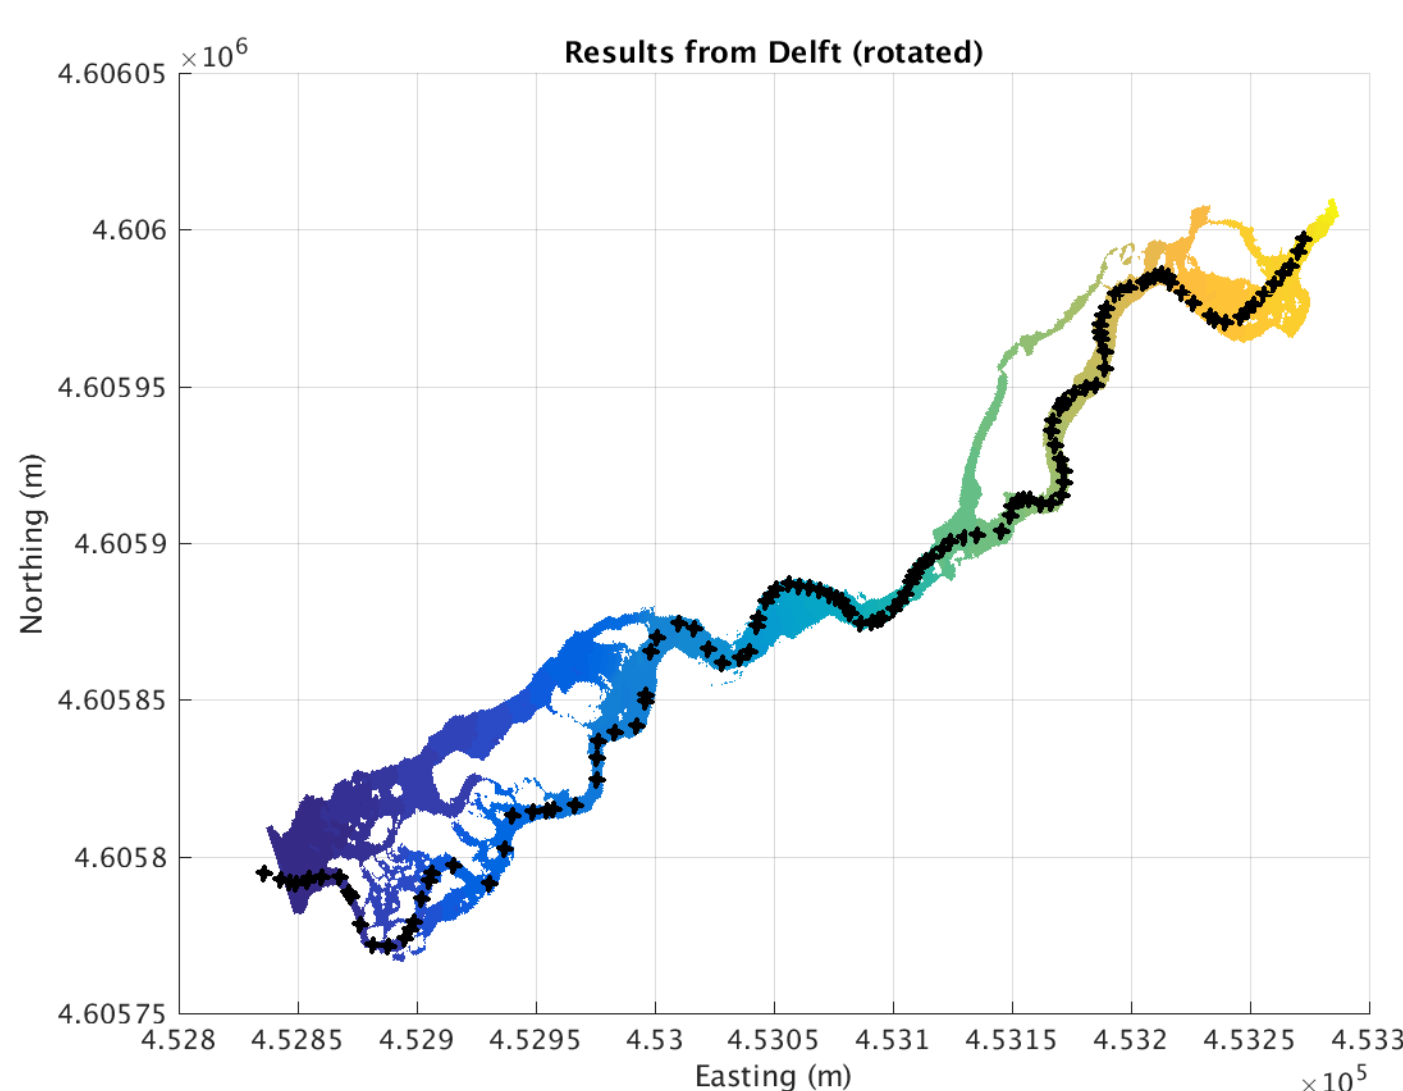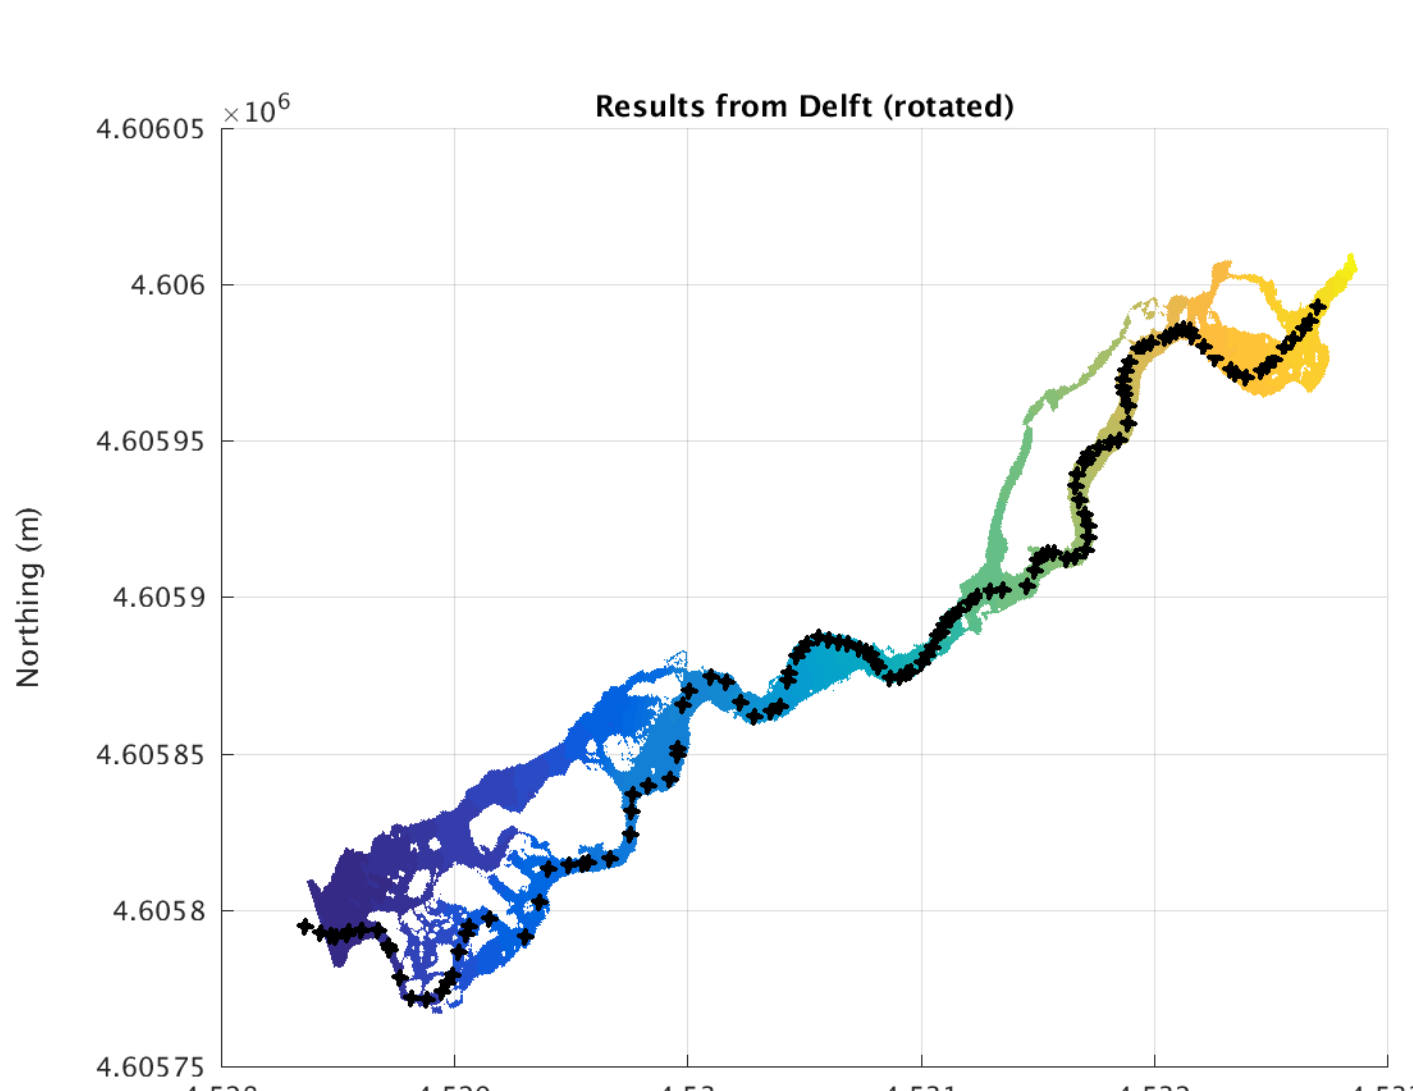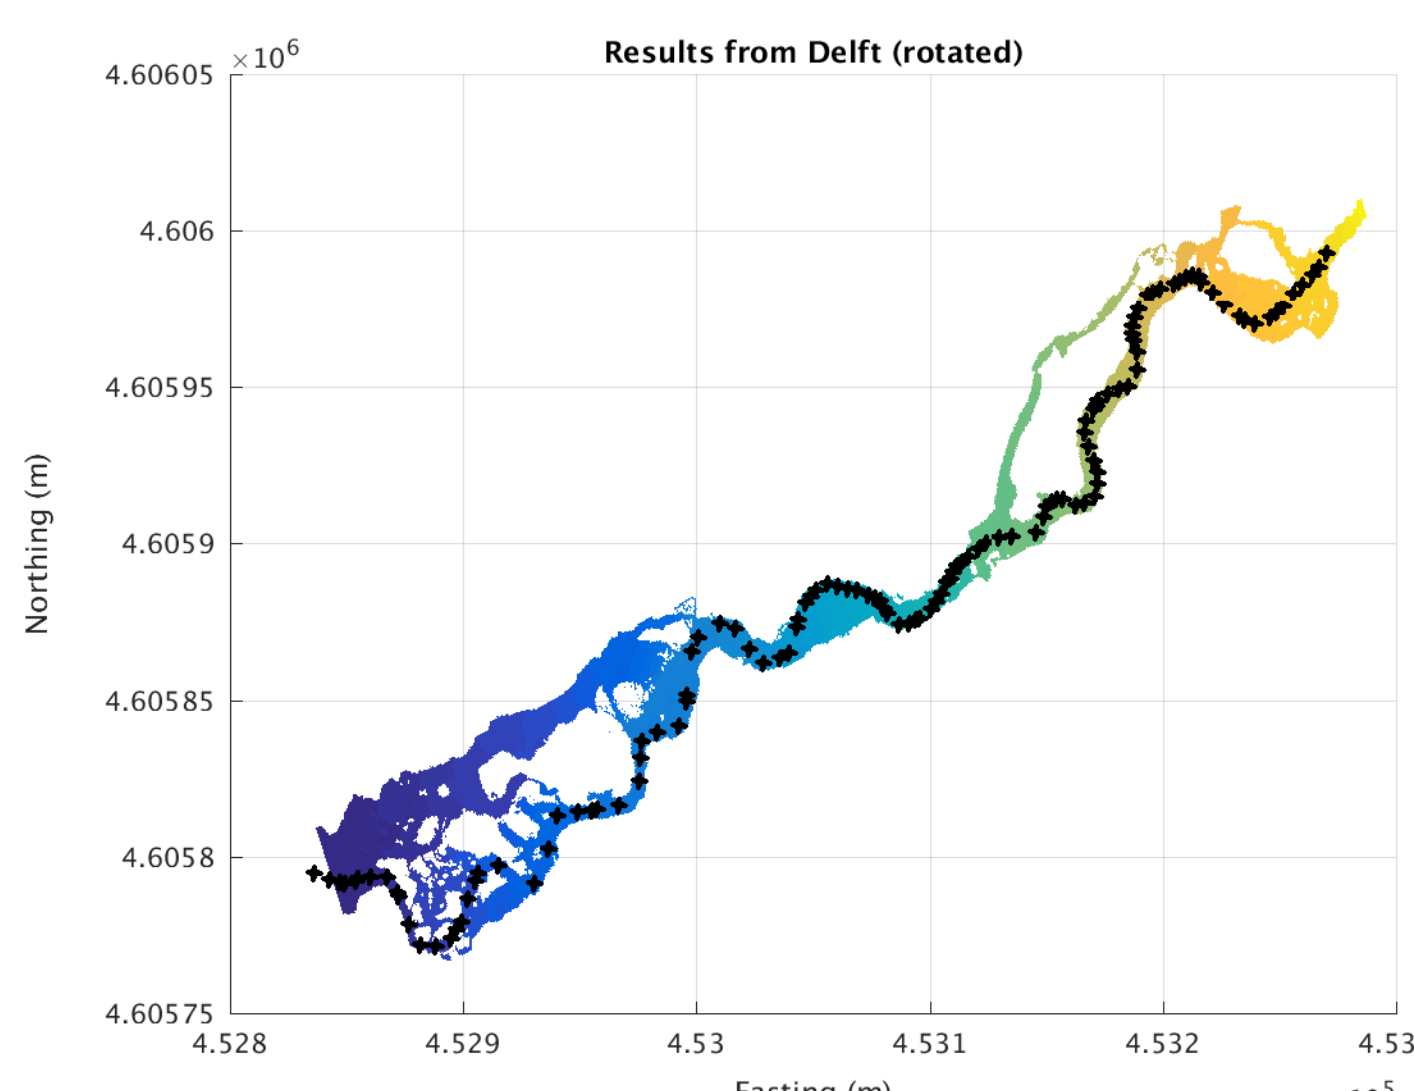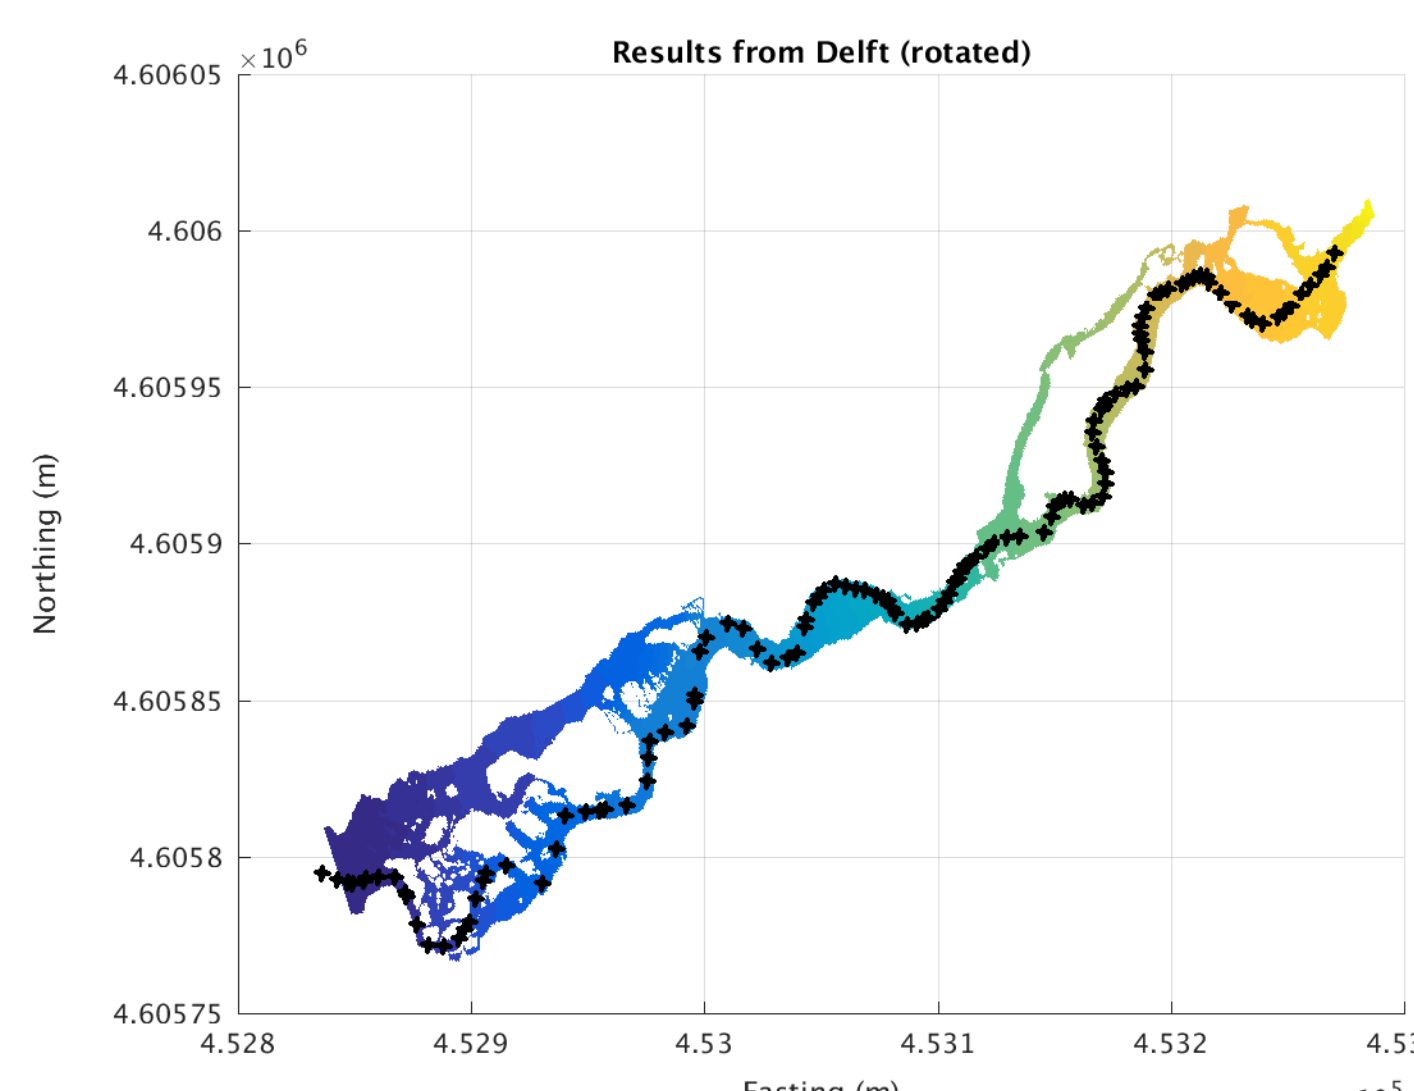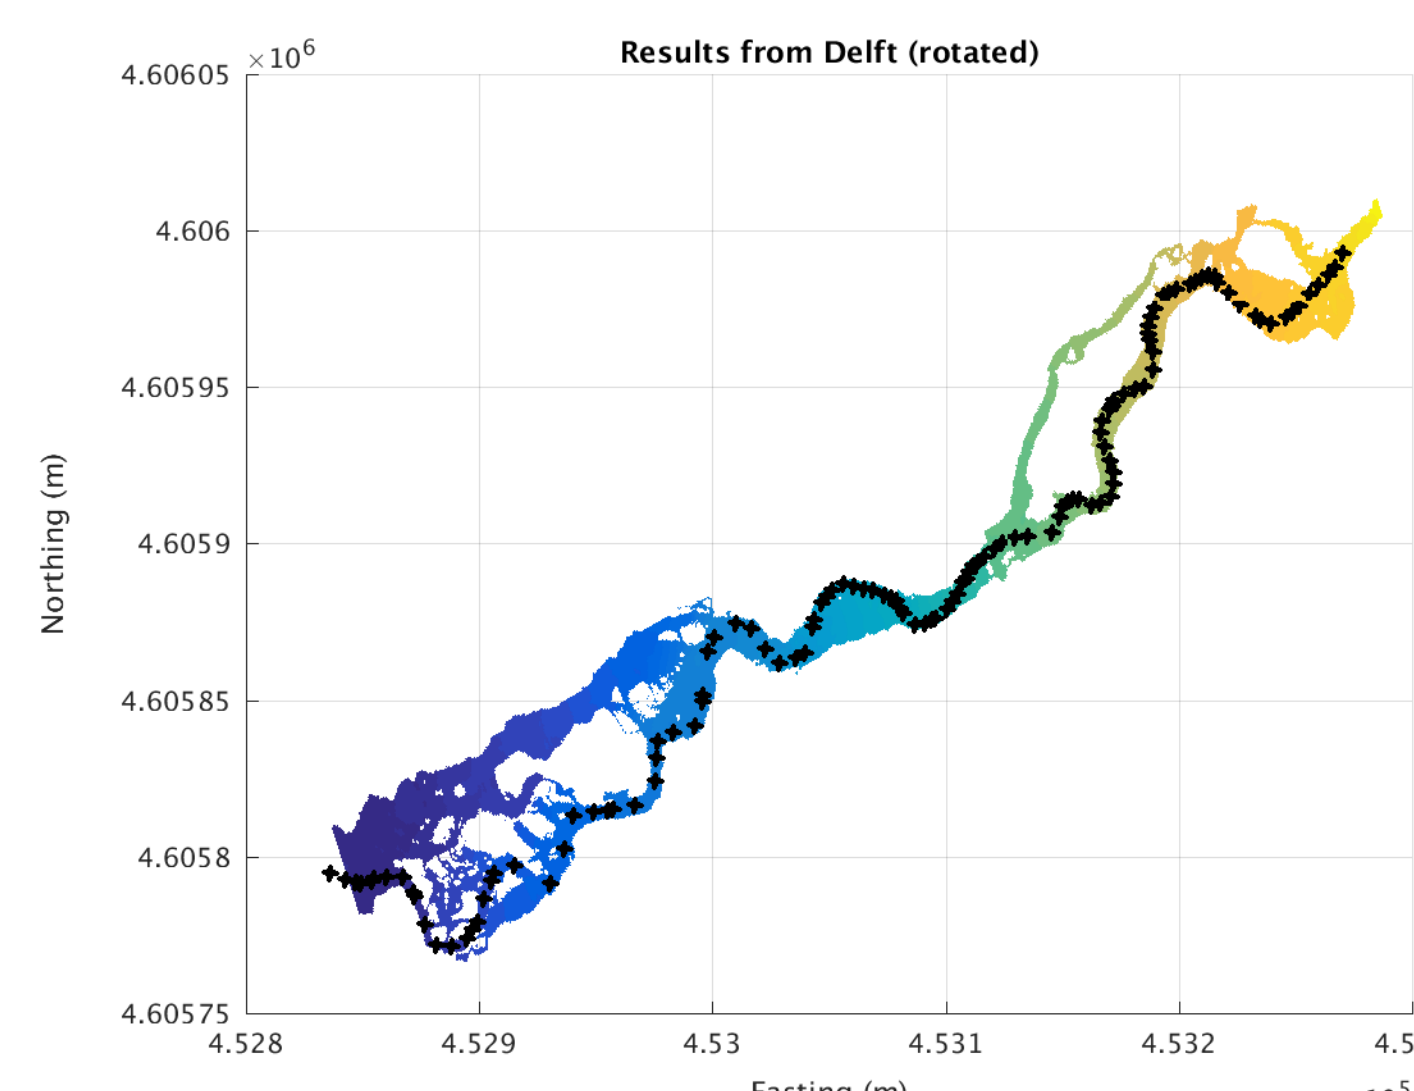



Manning's  $n$

0.01

0.03

0.04

0.065

0.1

0.001

0.01

Viscosity ( $\text{m}^2/\text{s}$ )

0.1

1.0

10.0

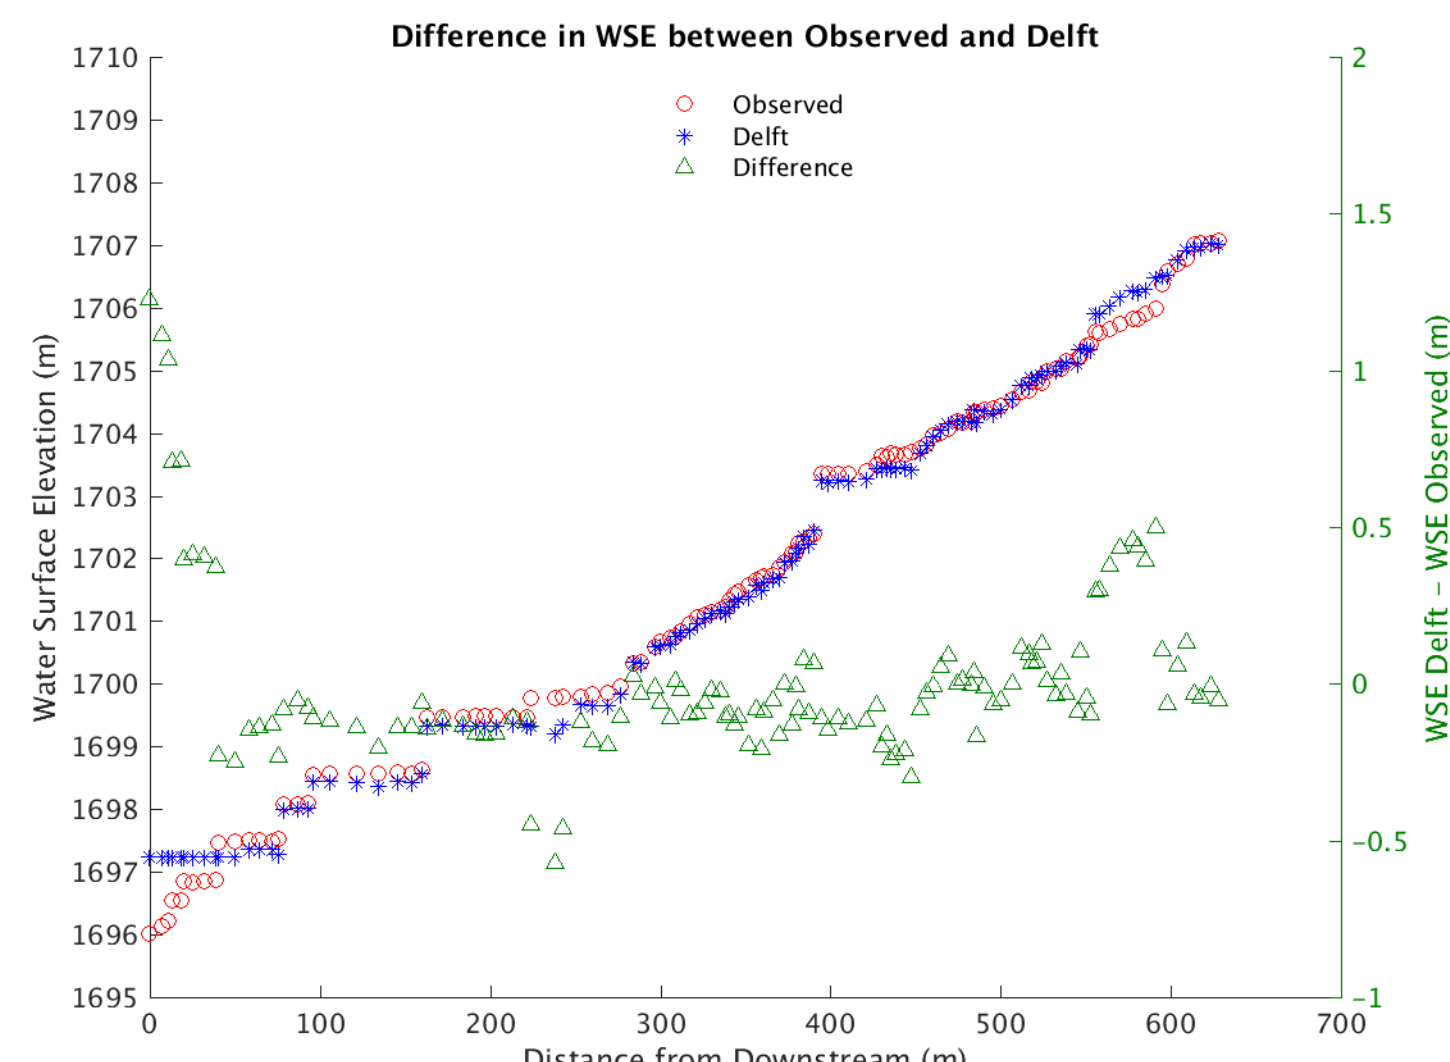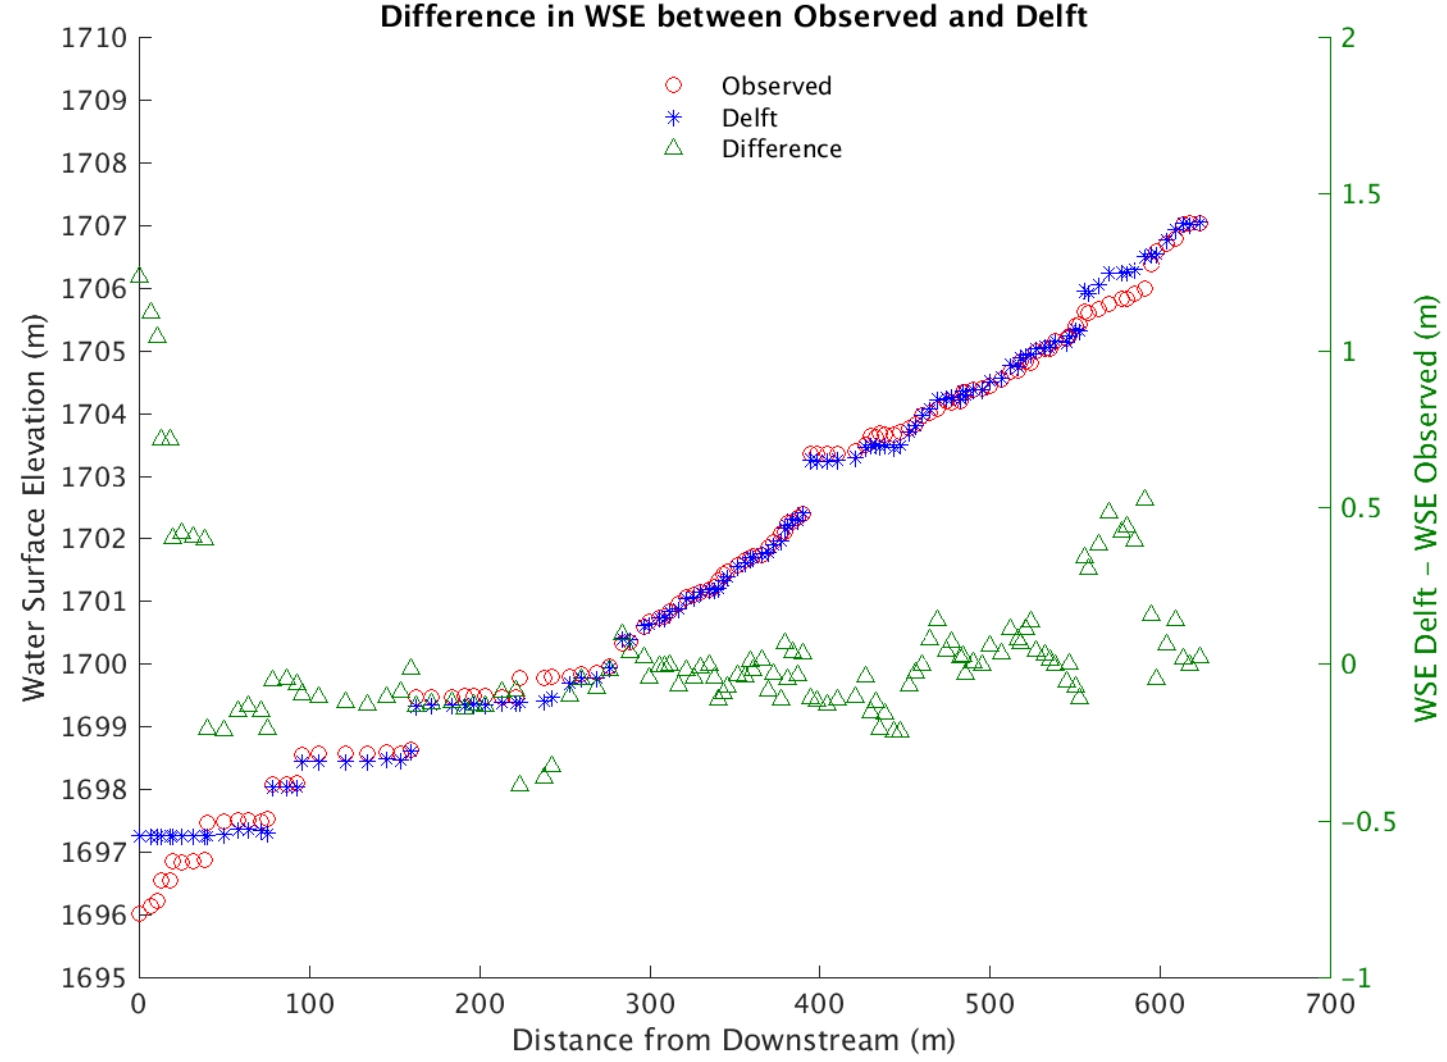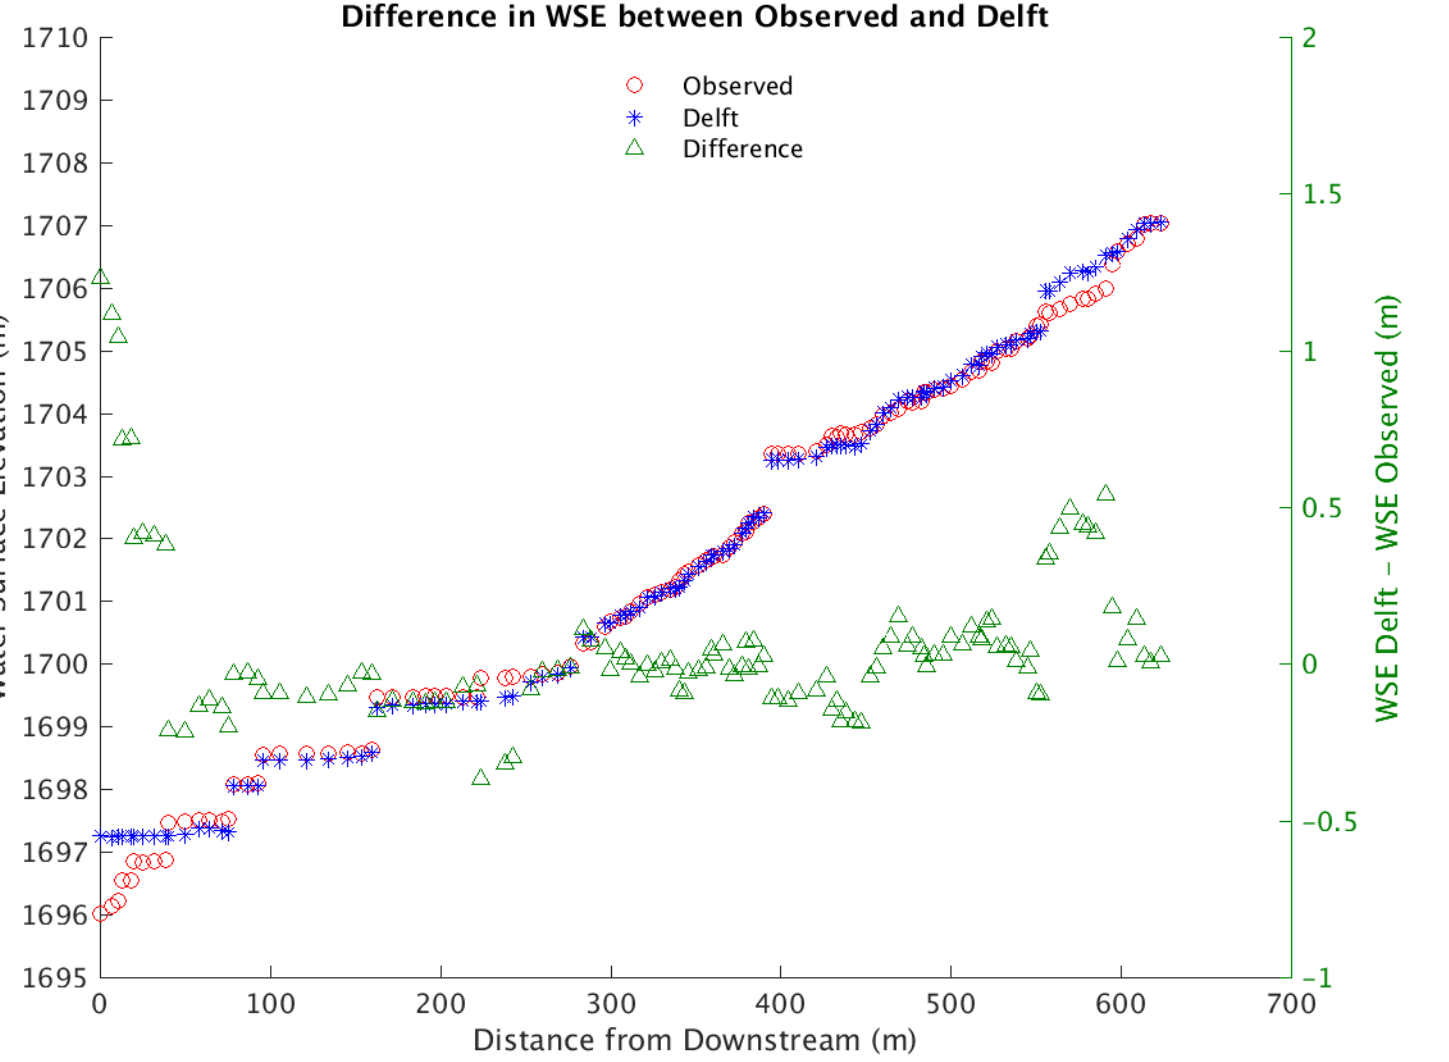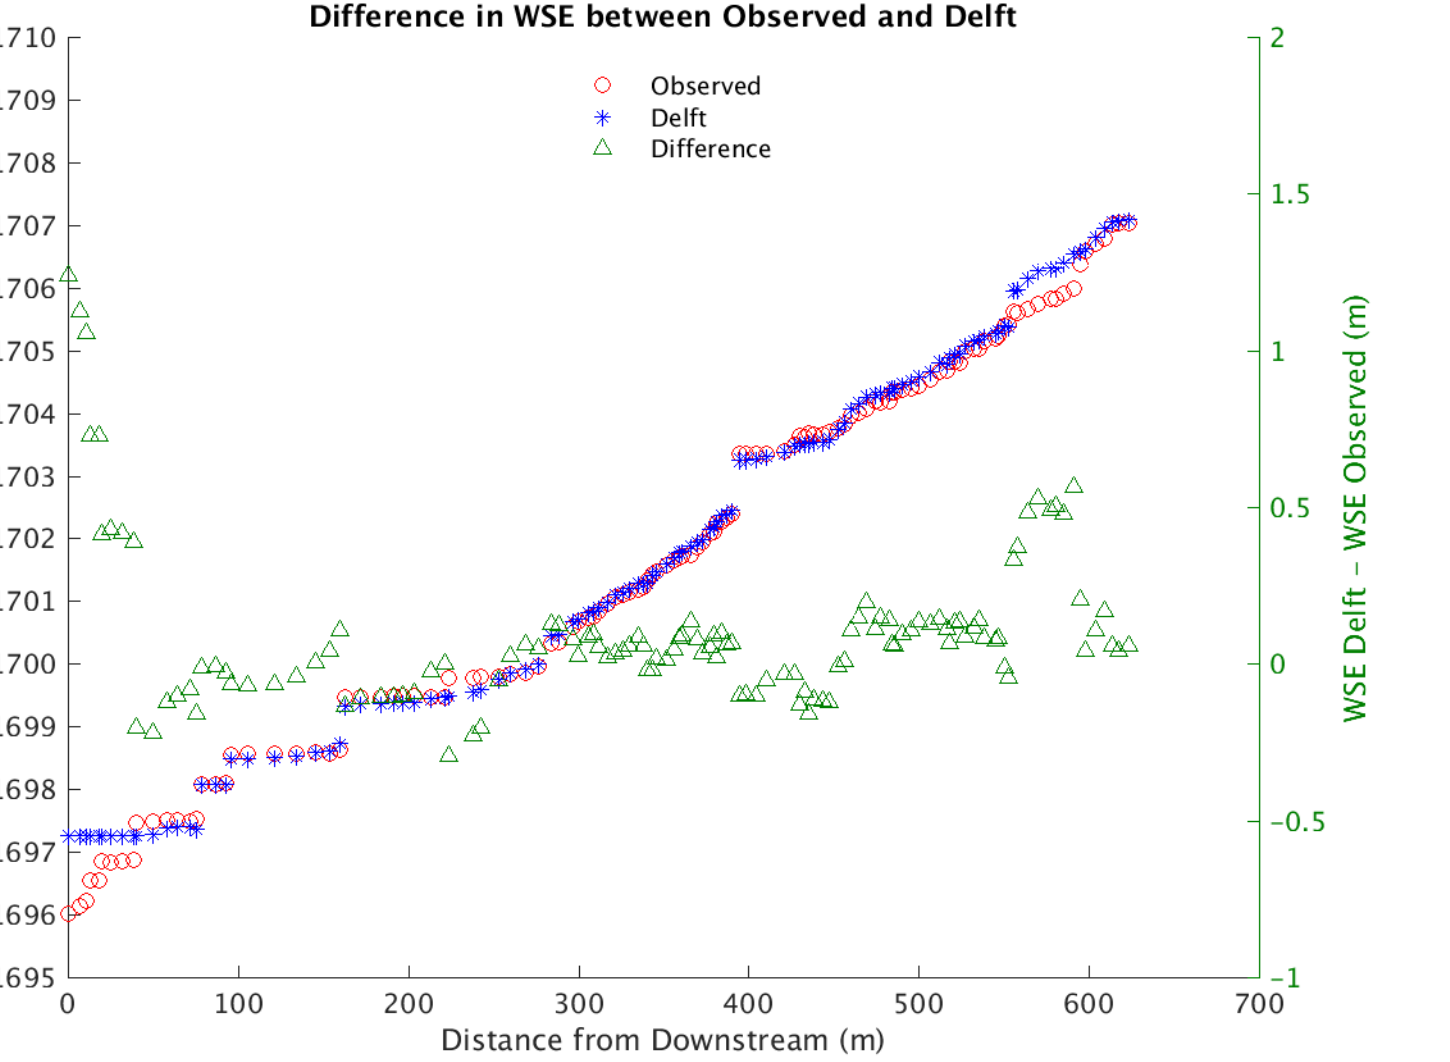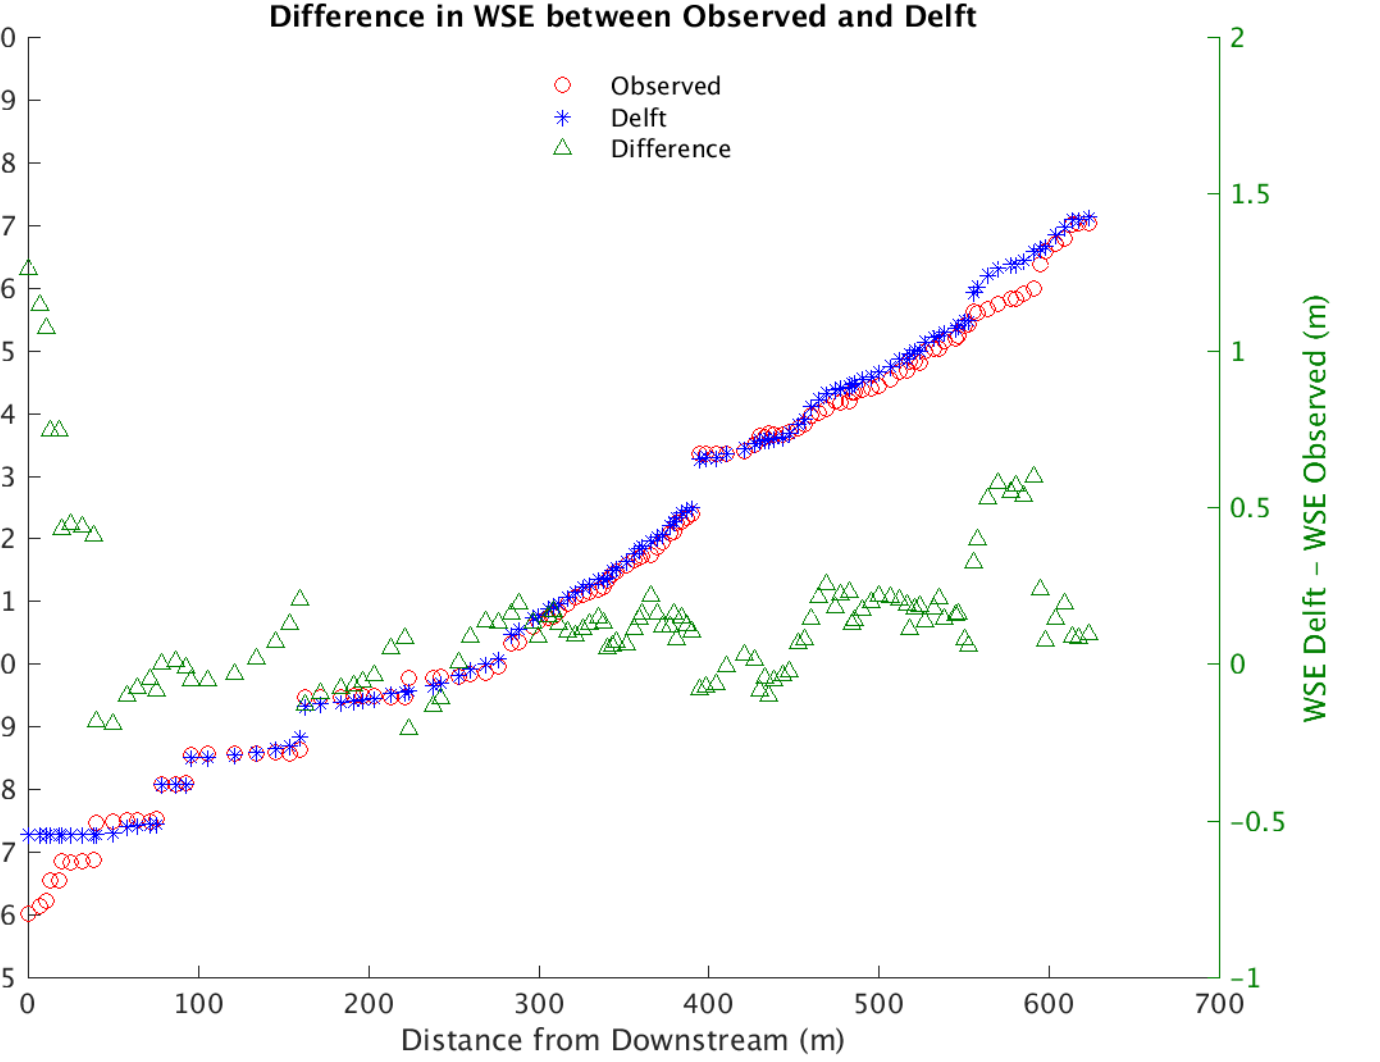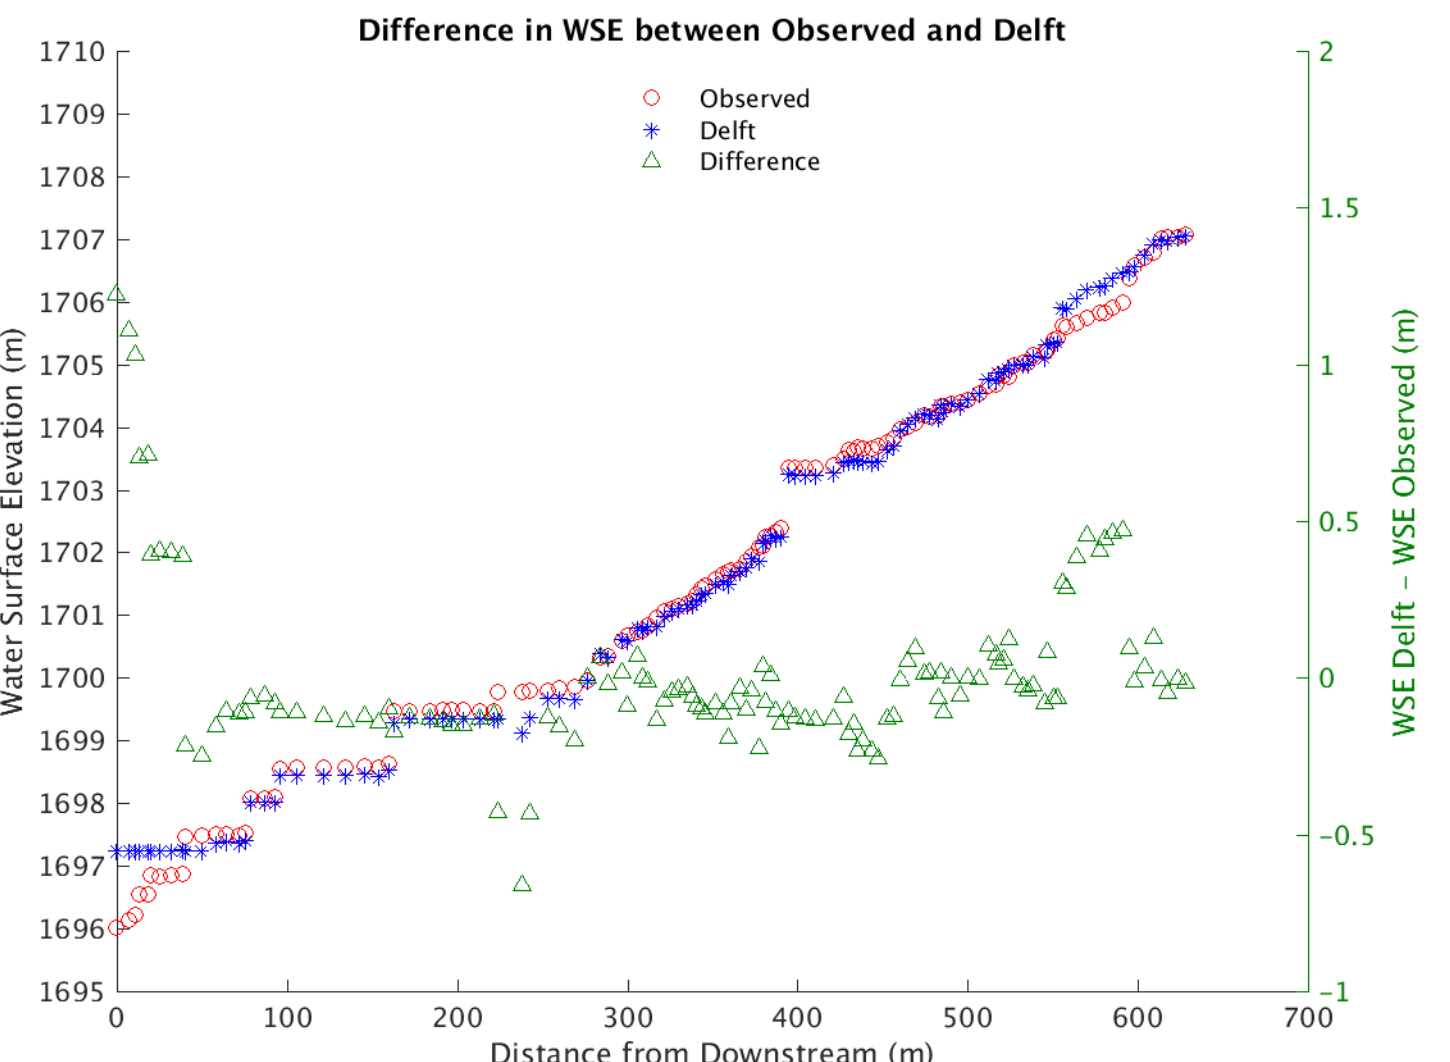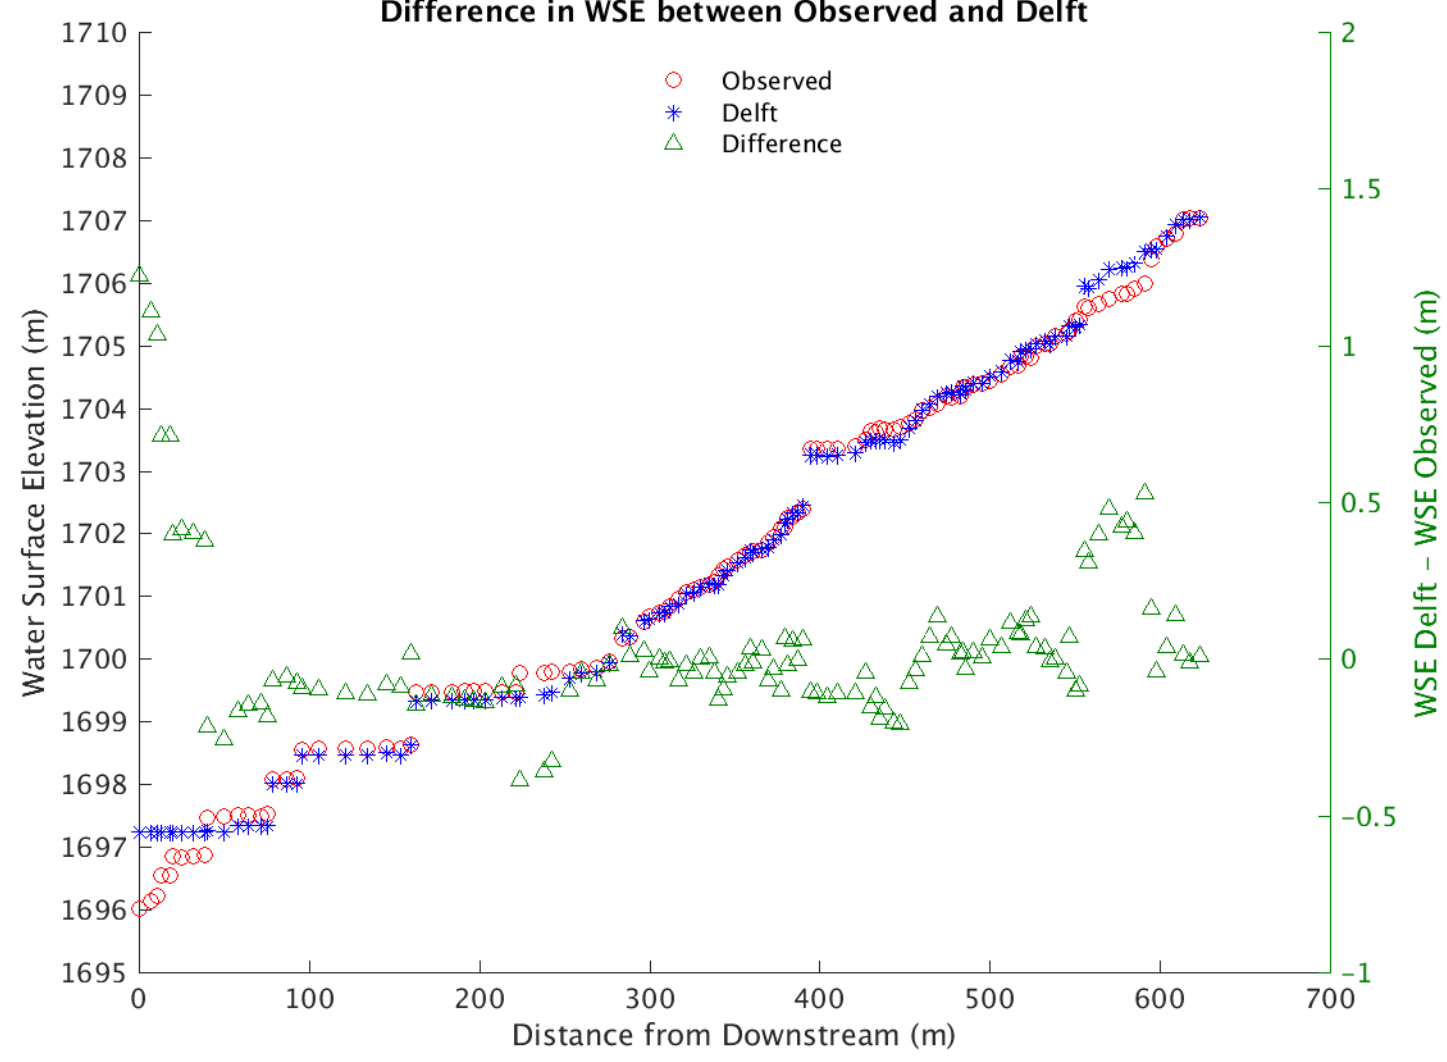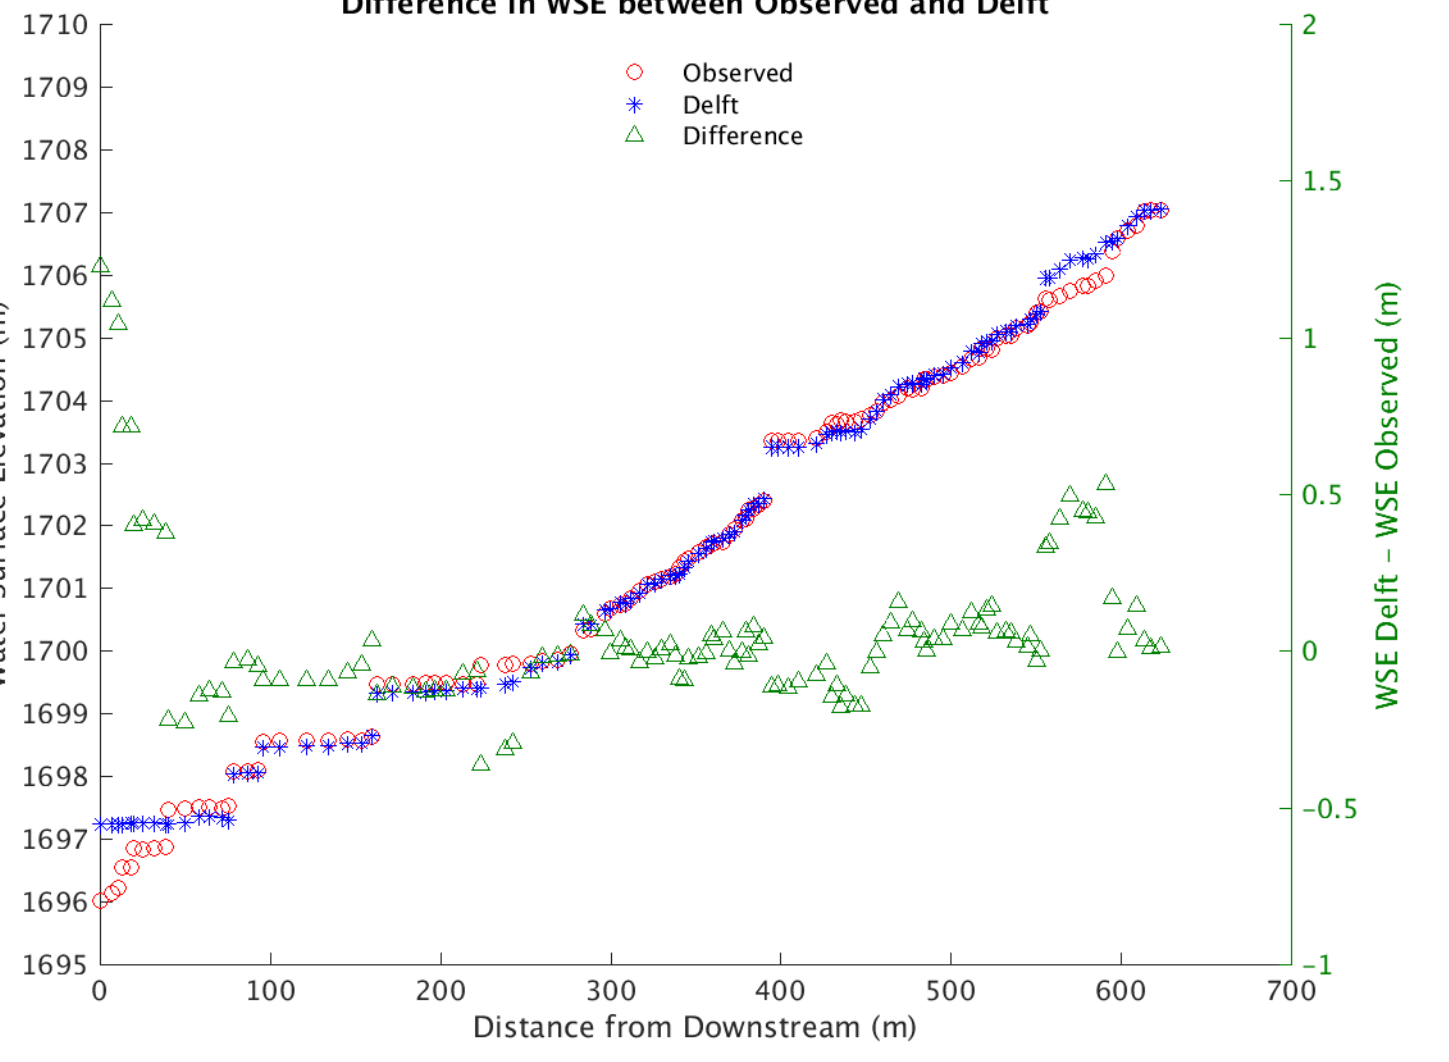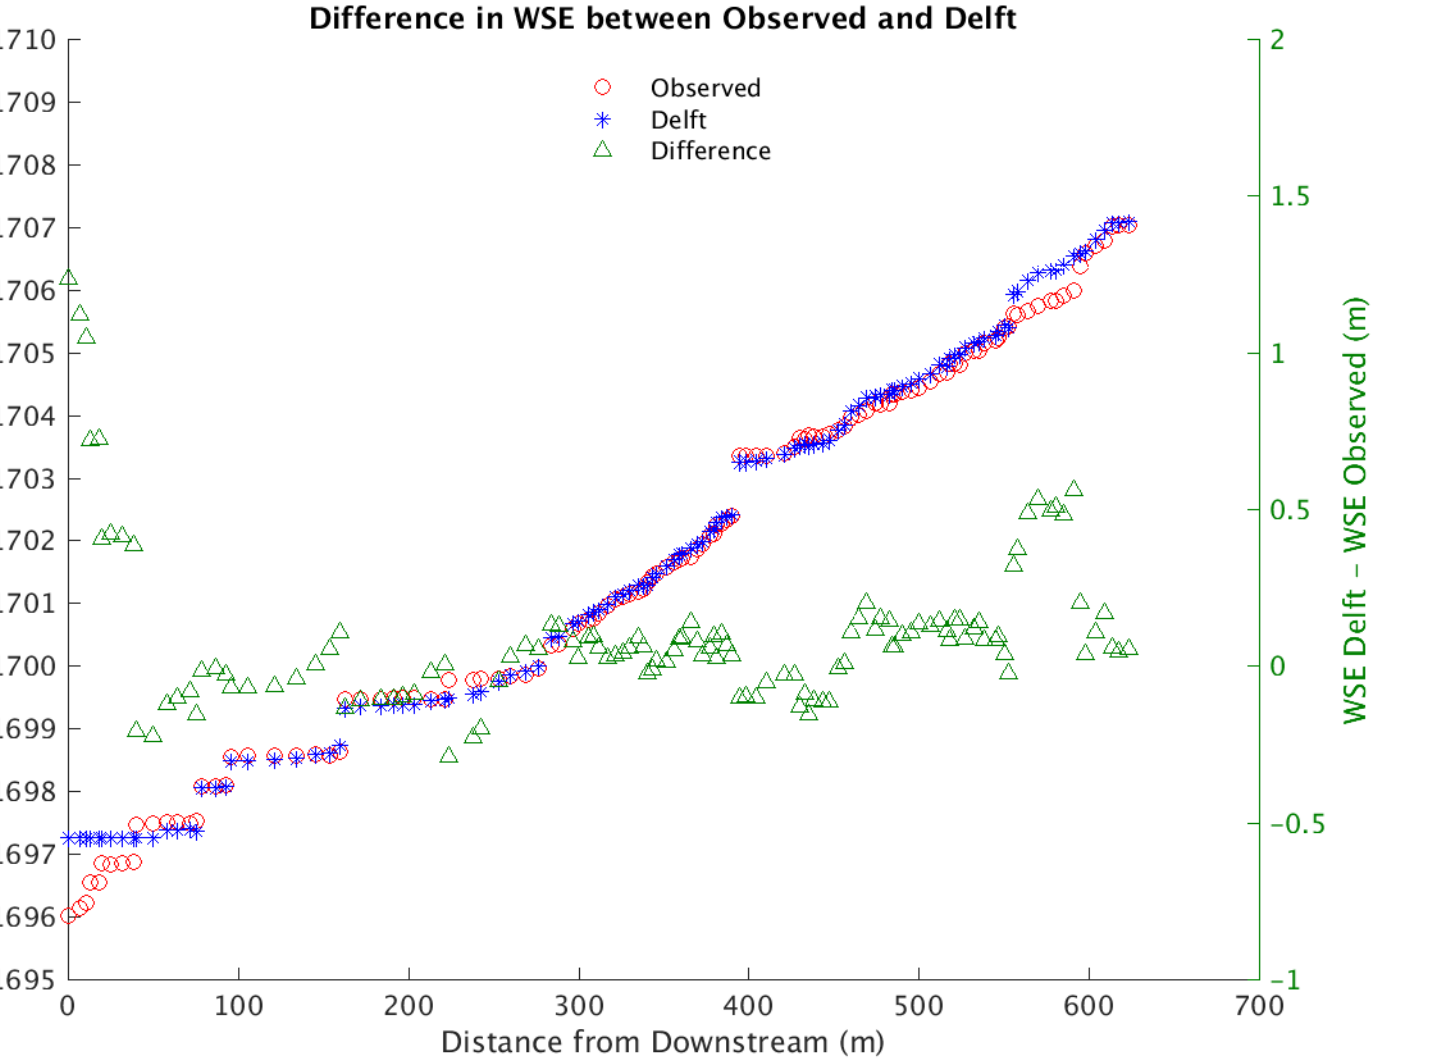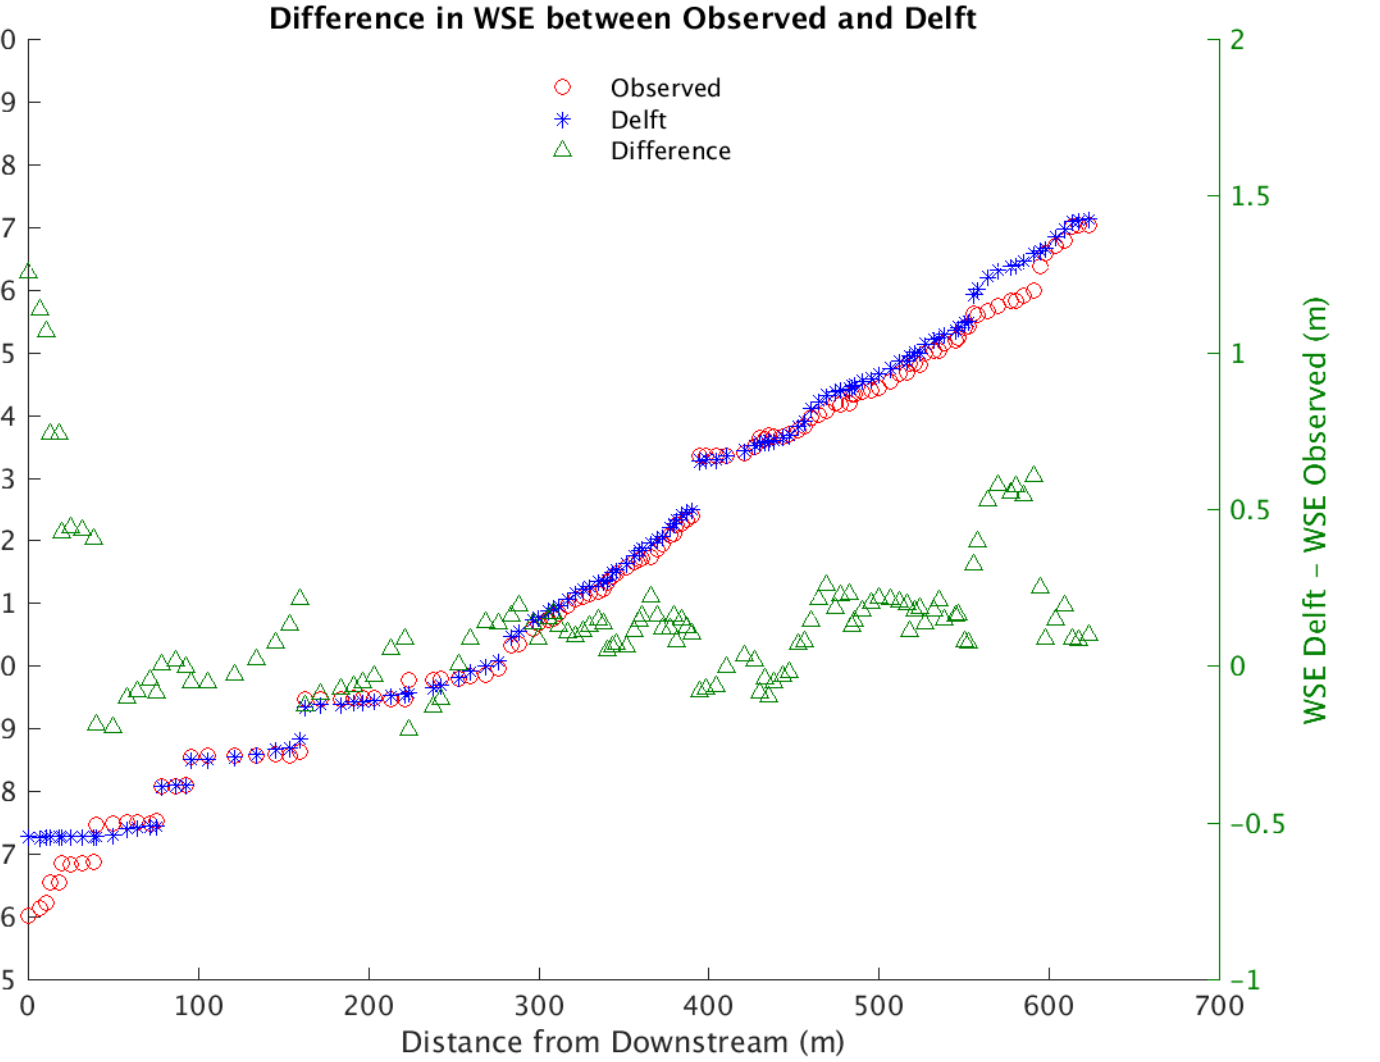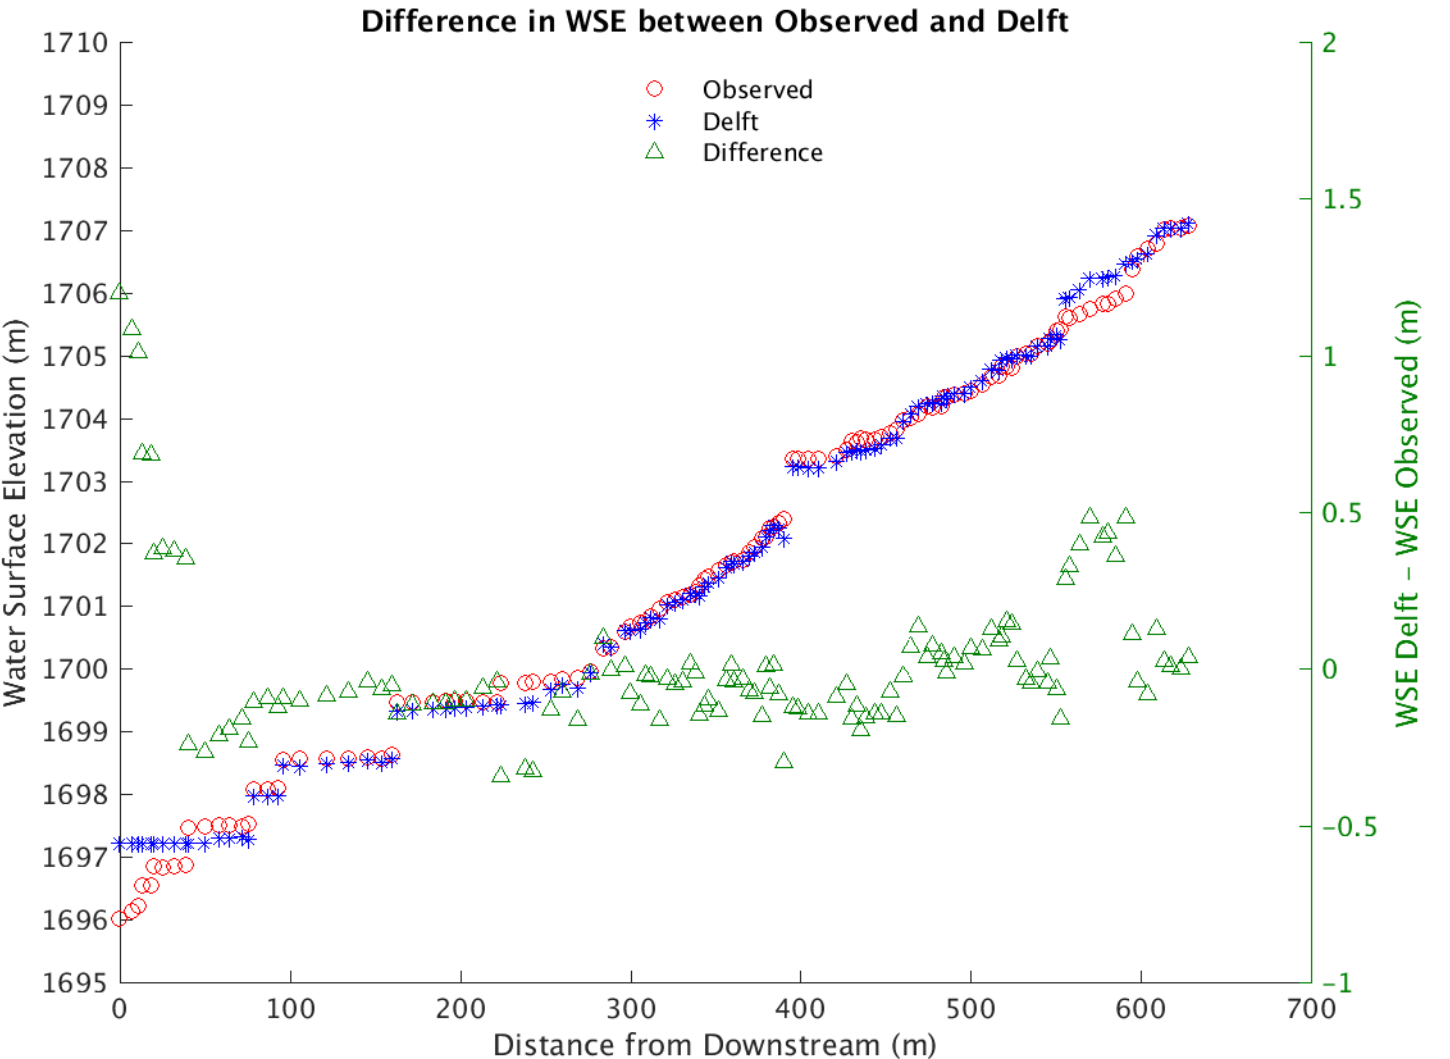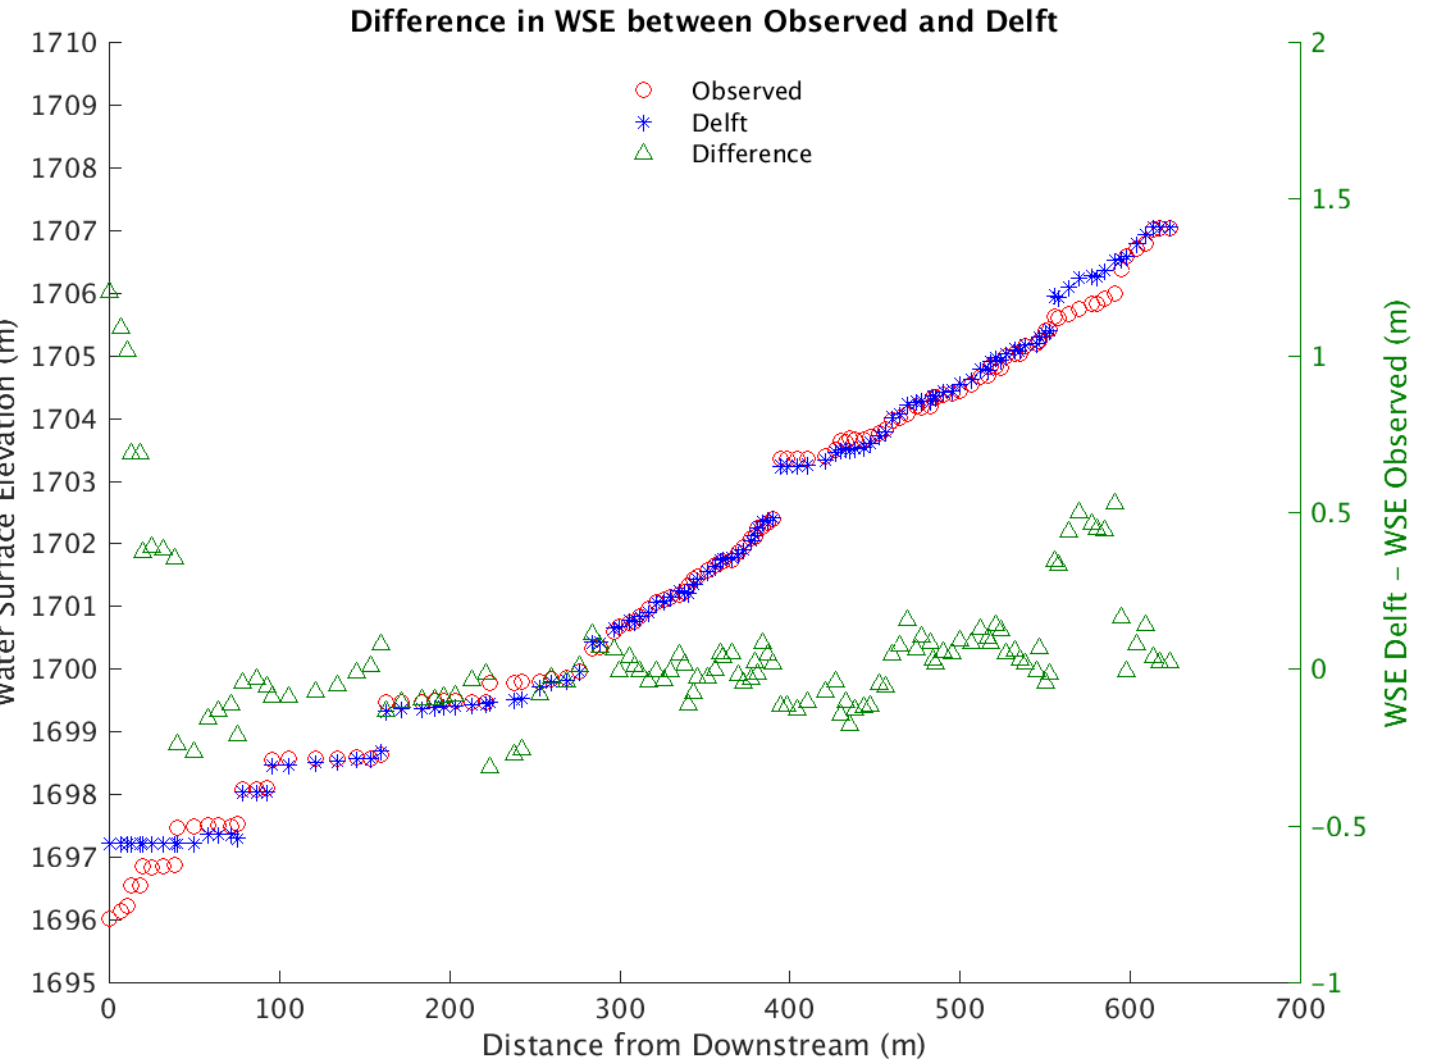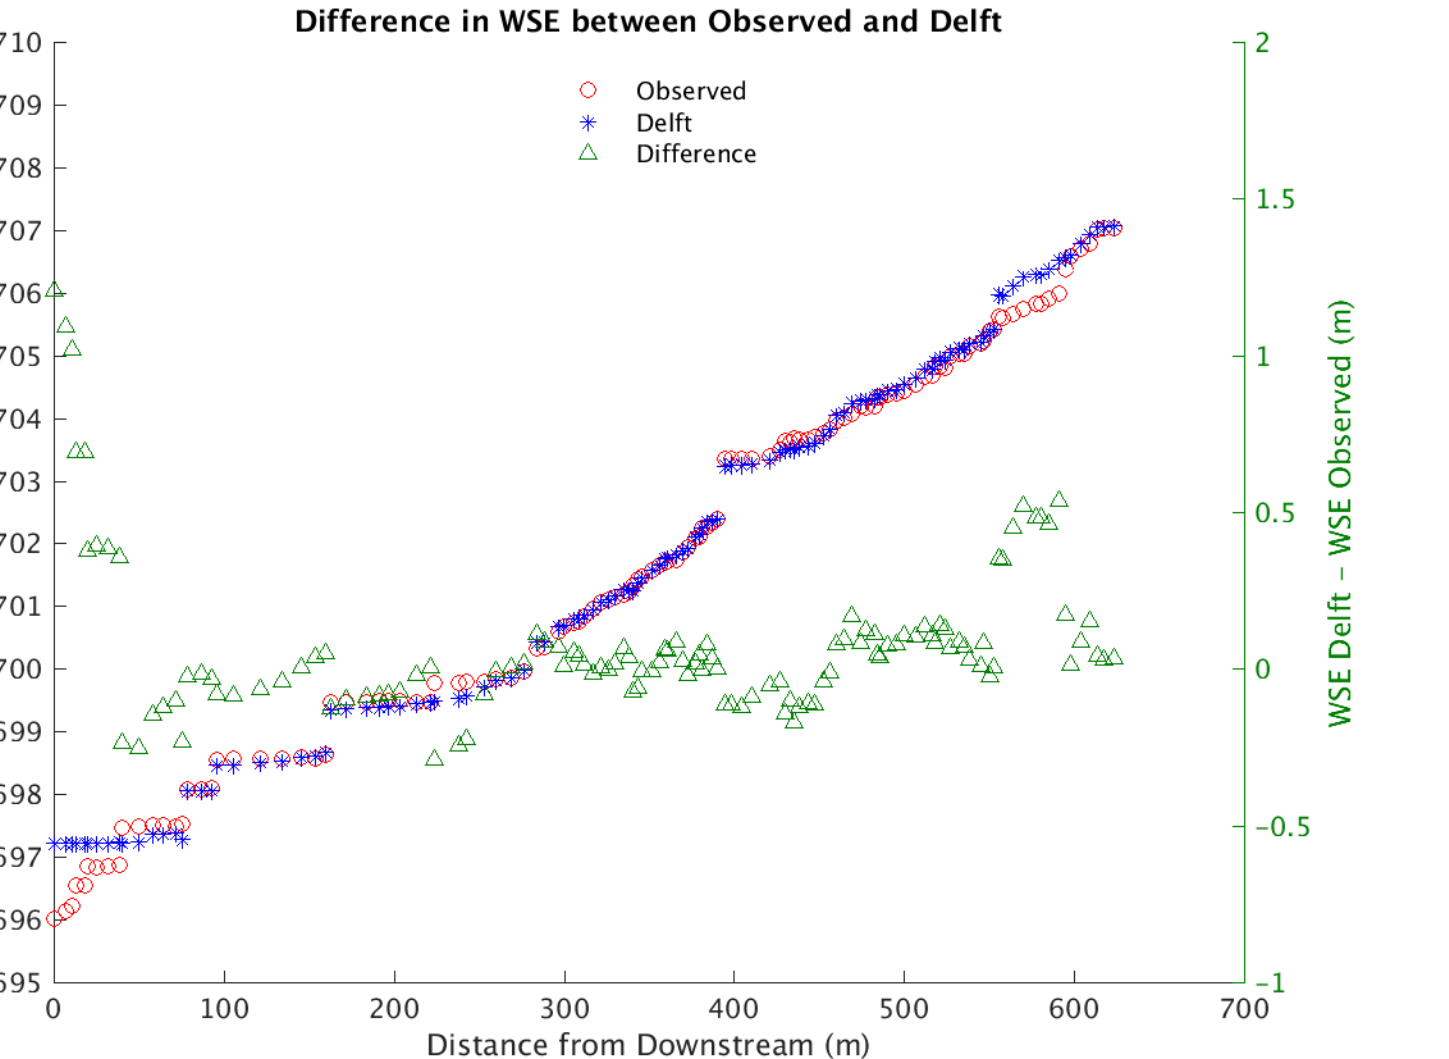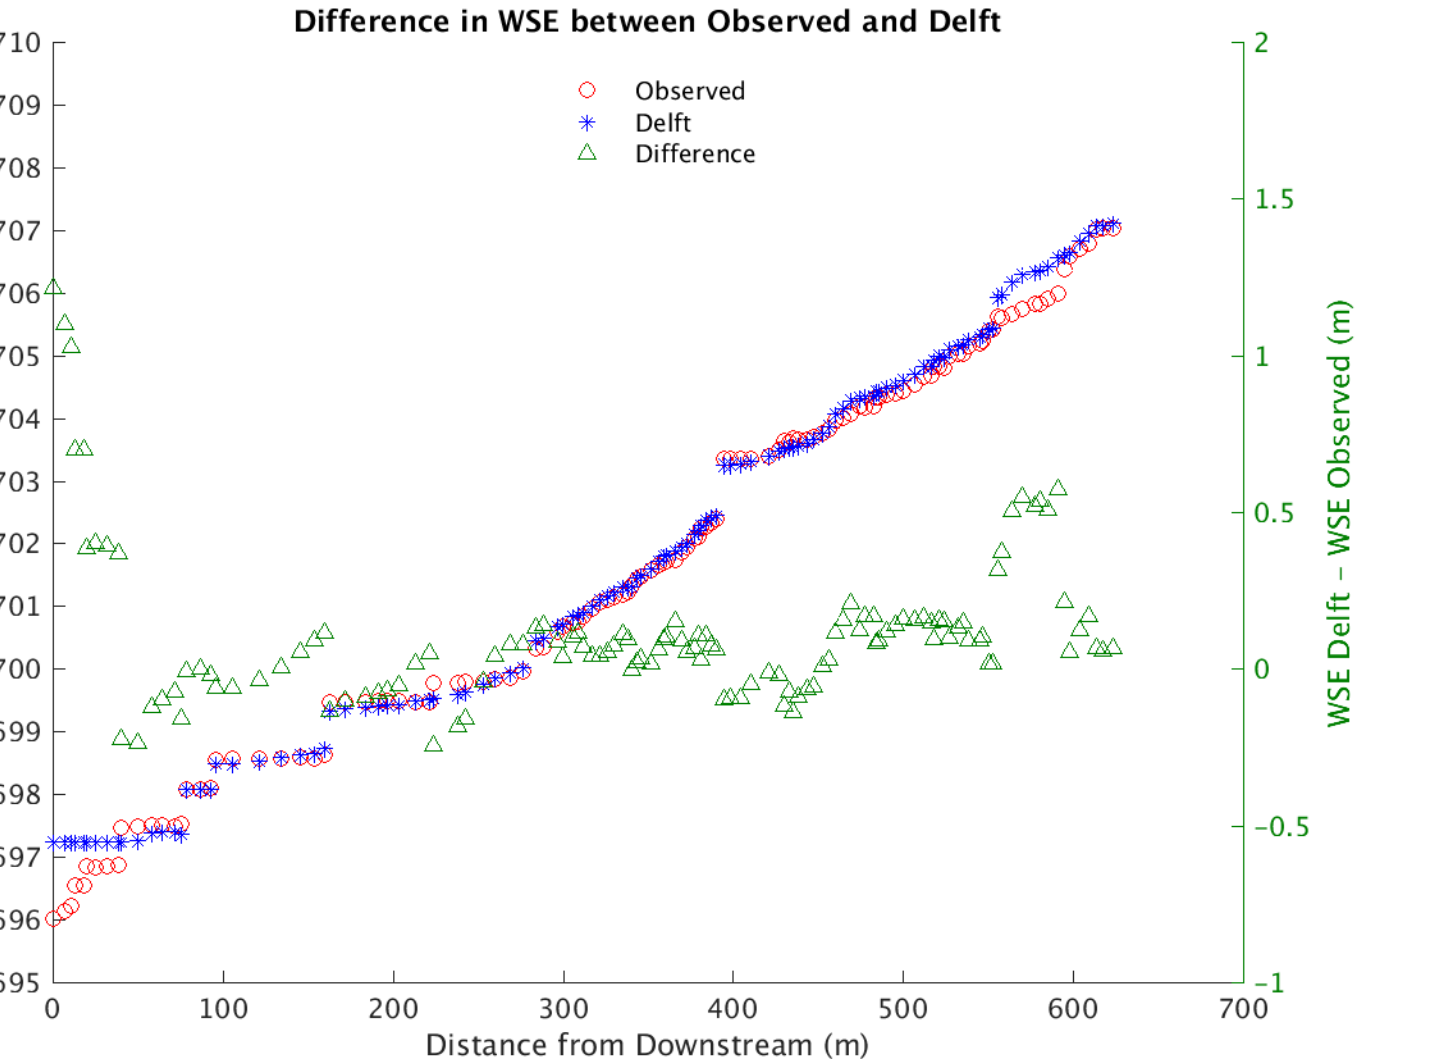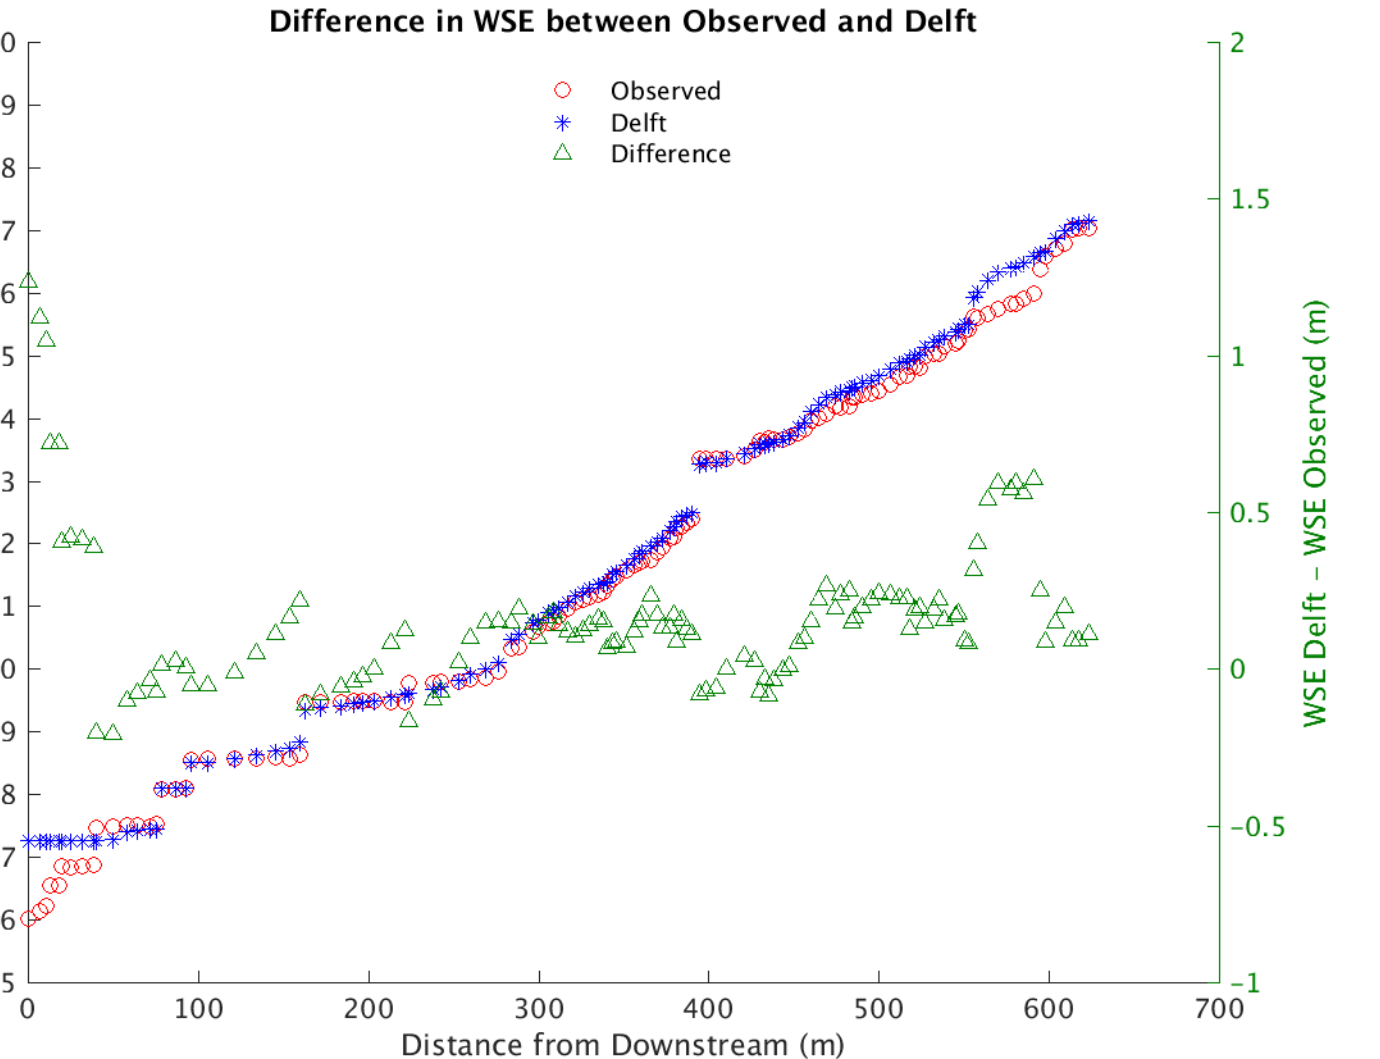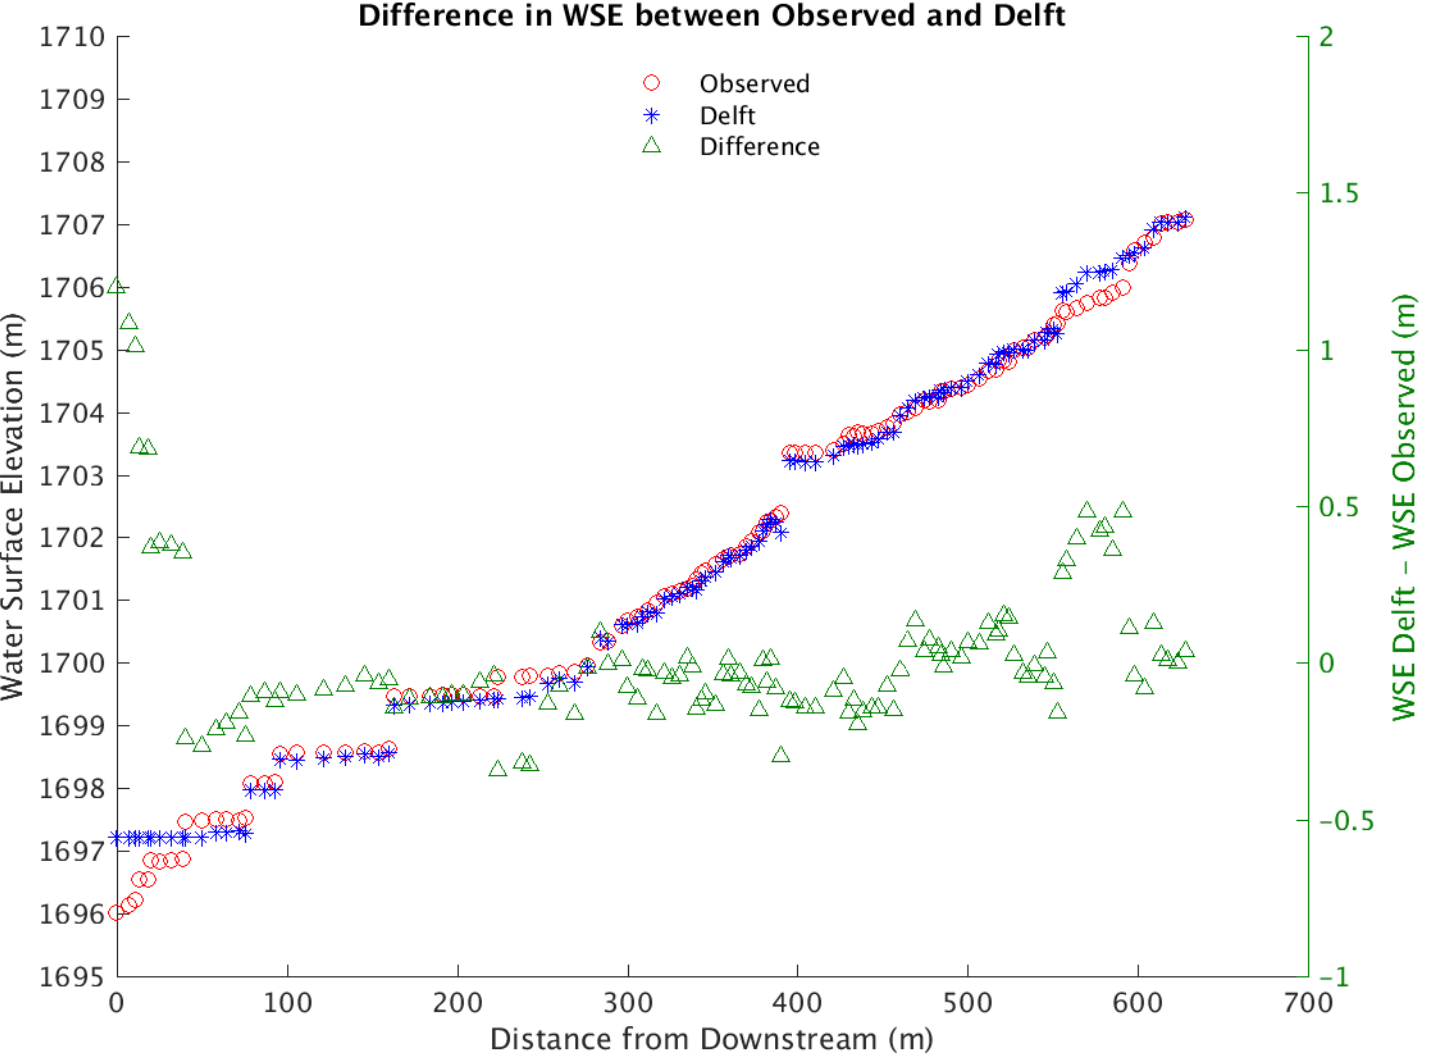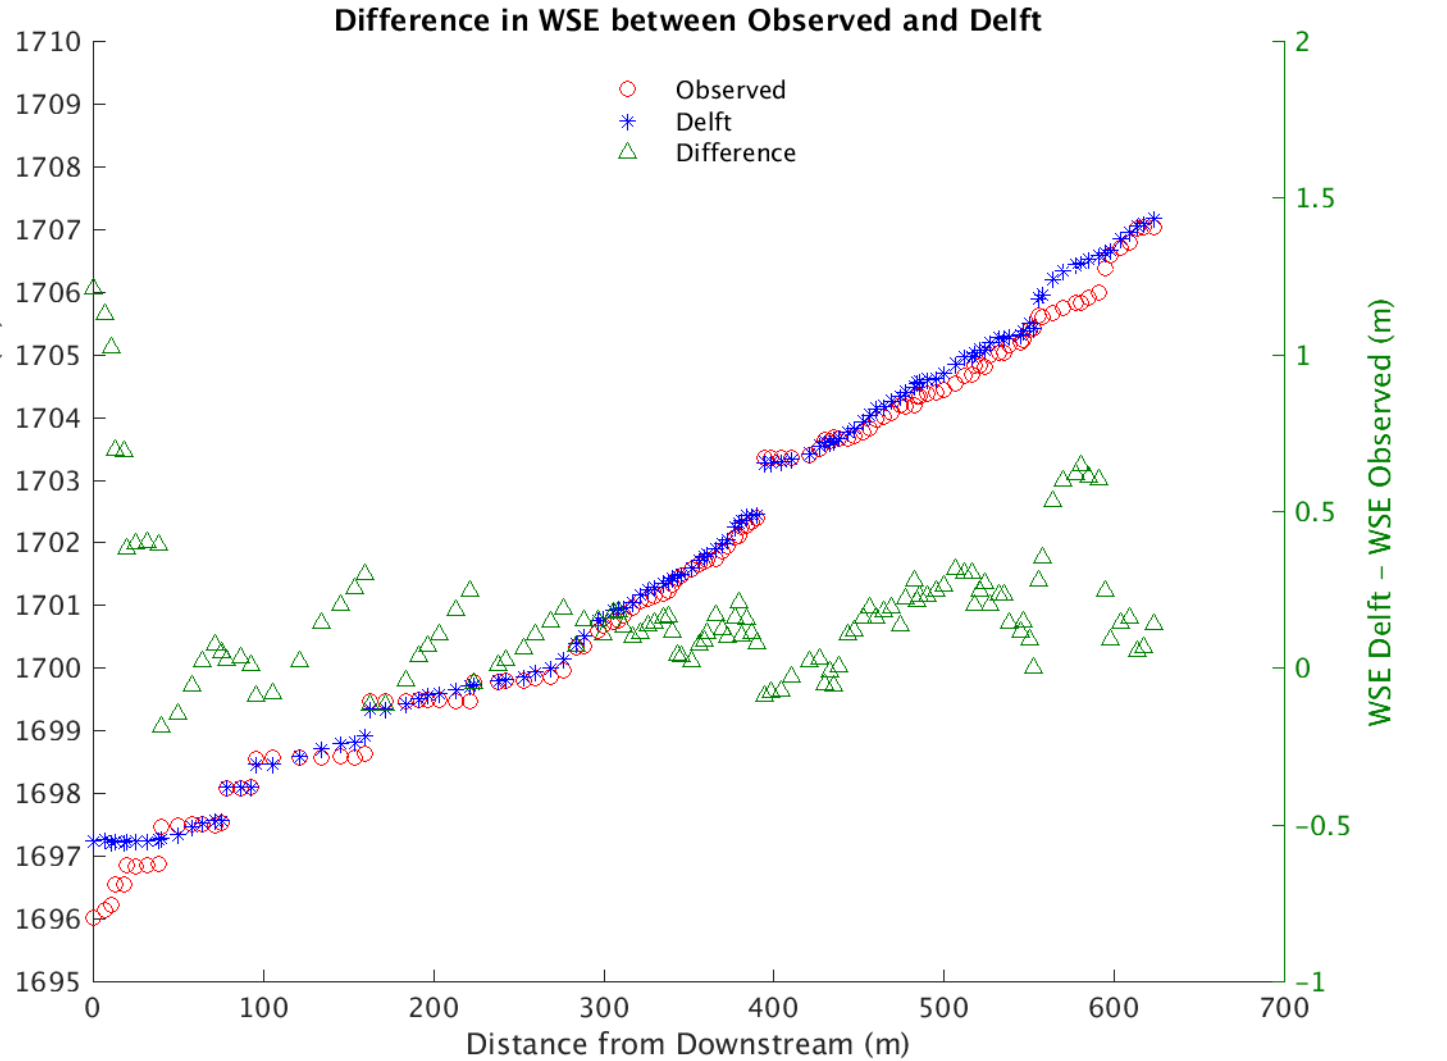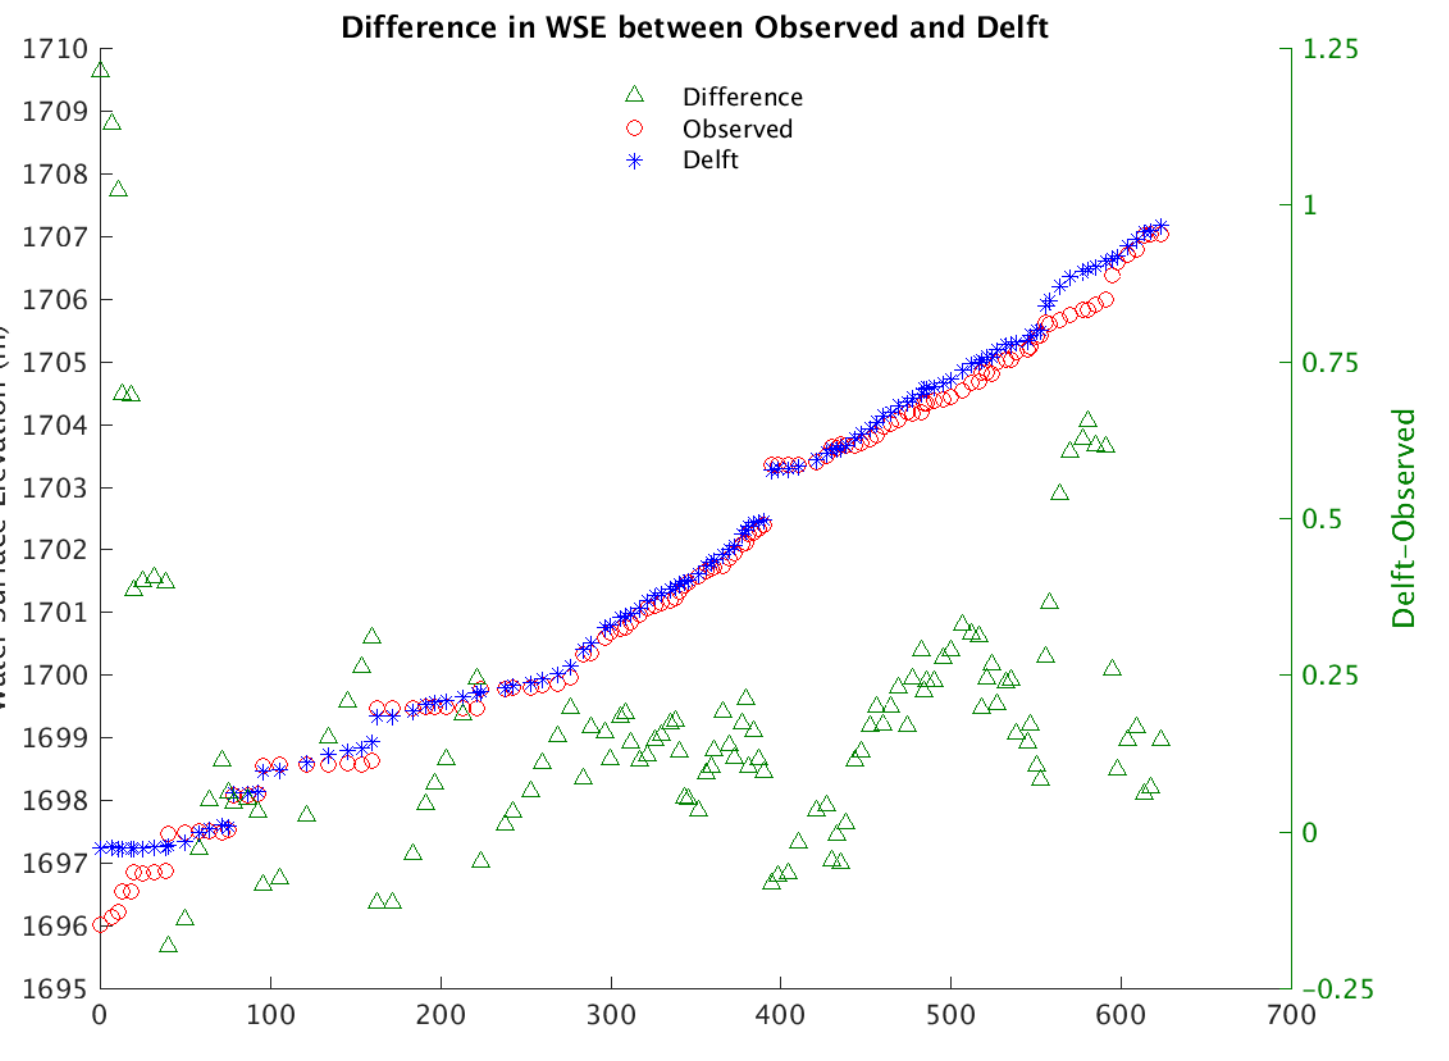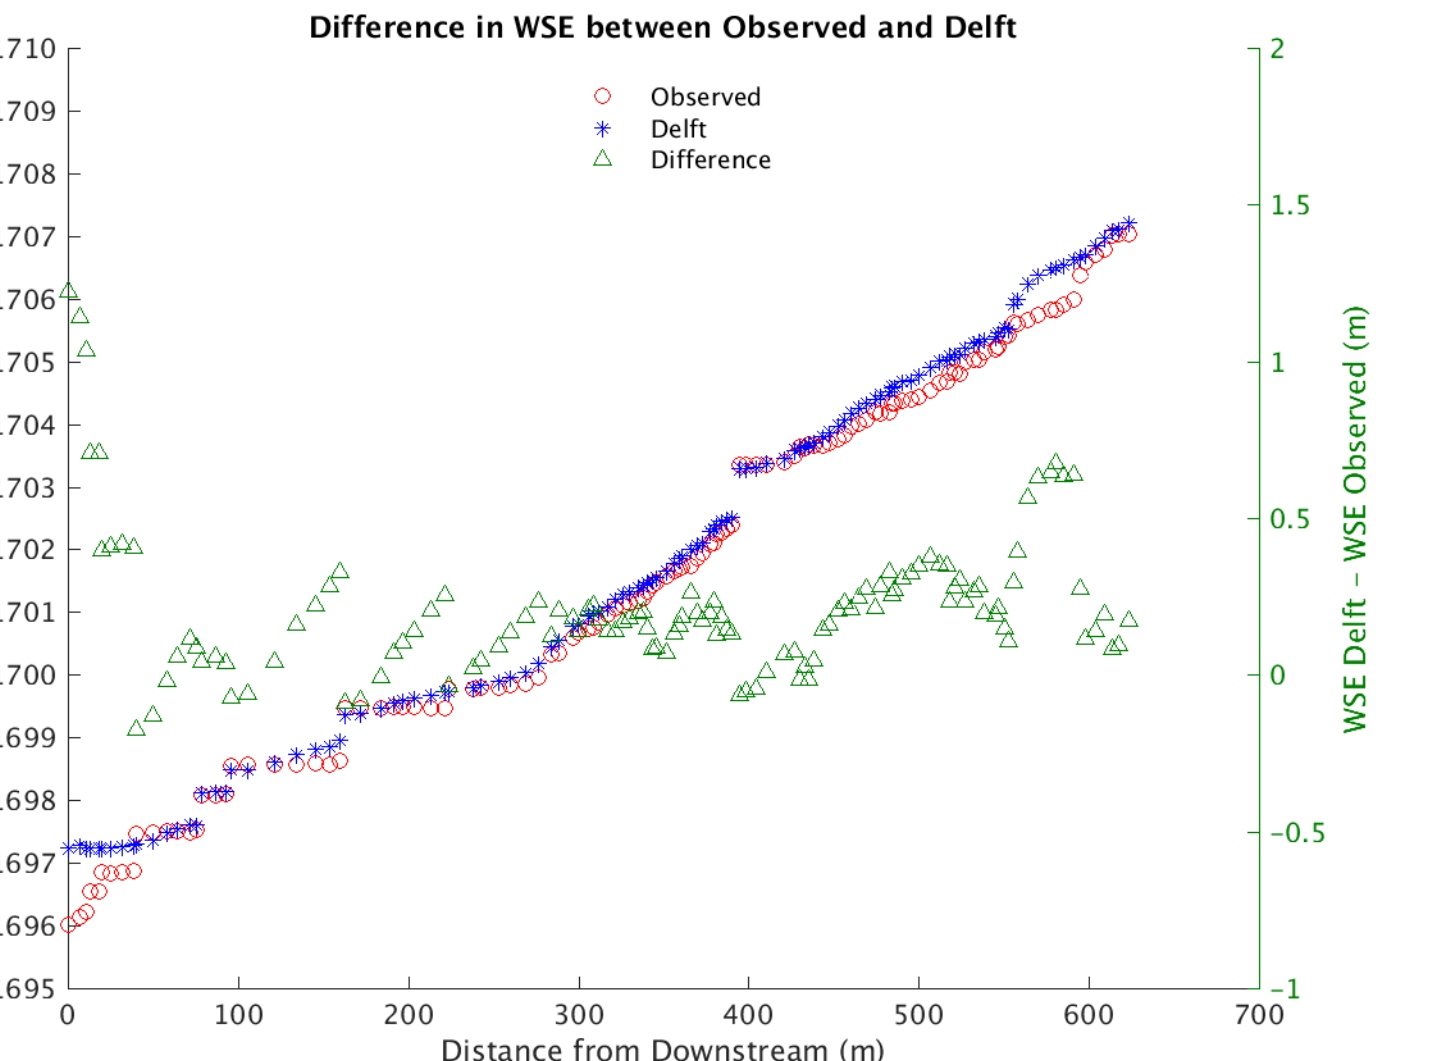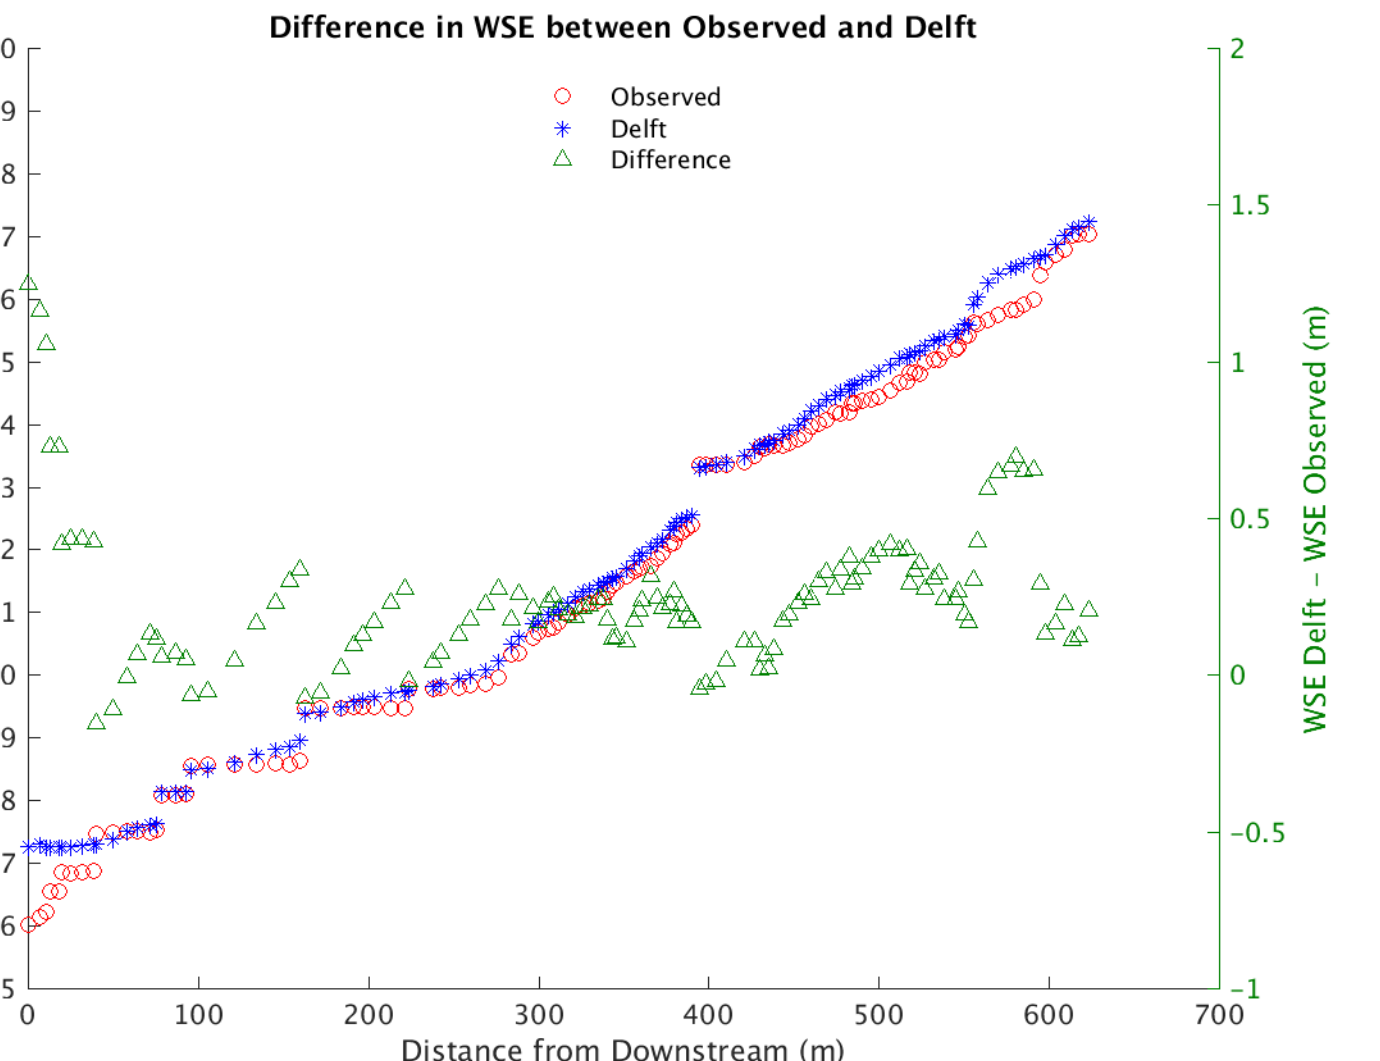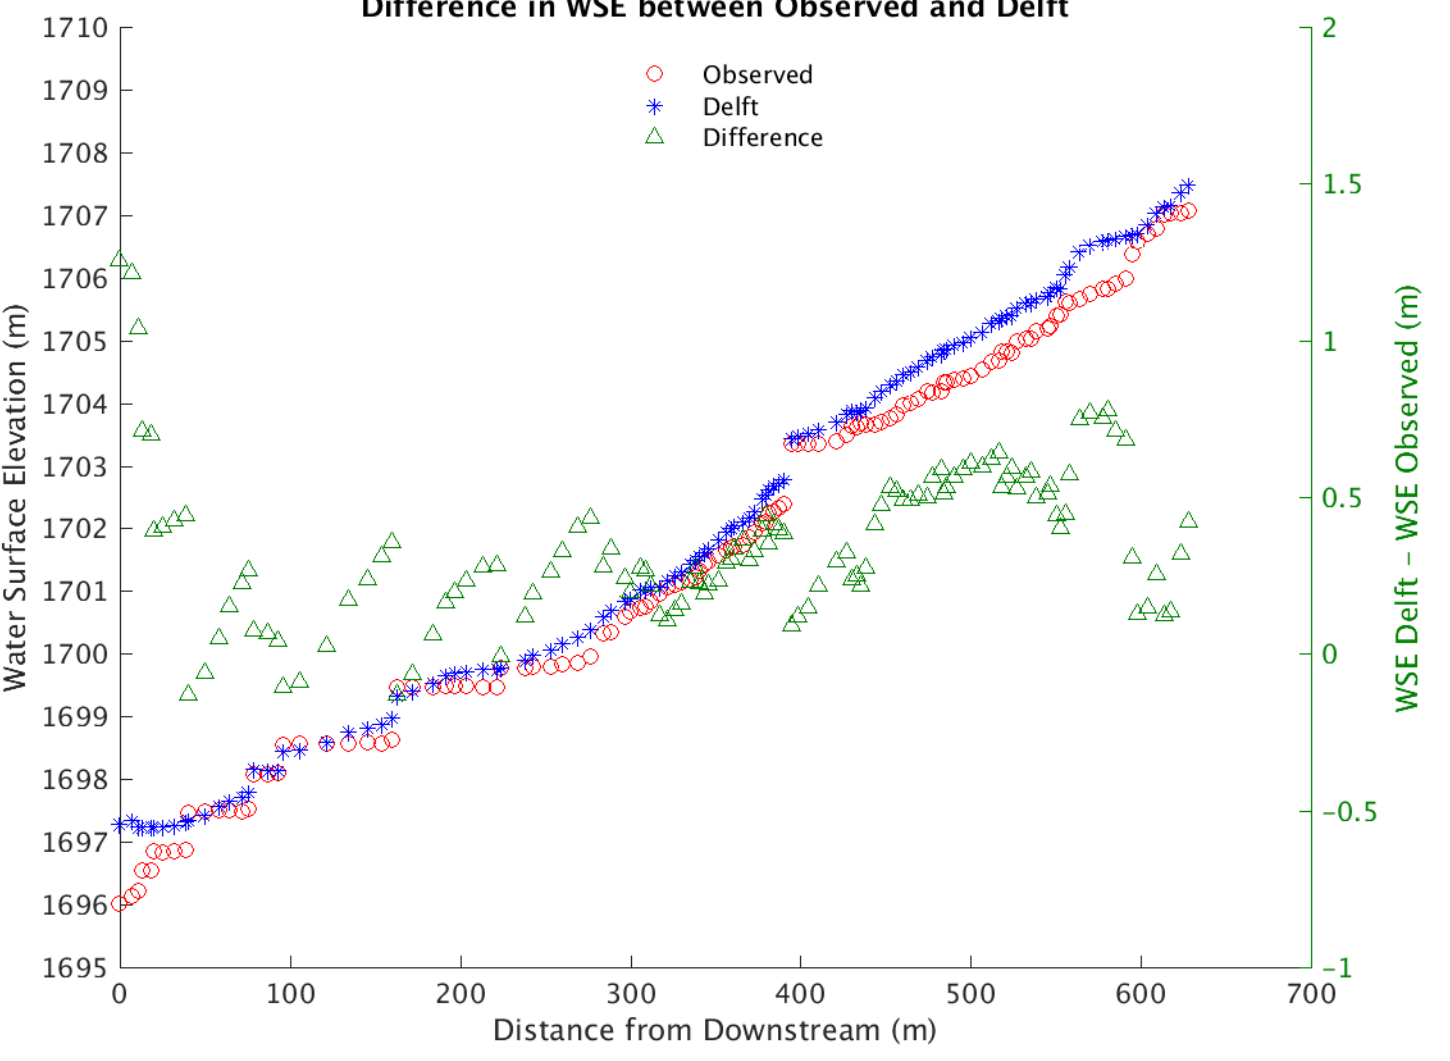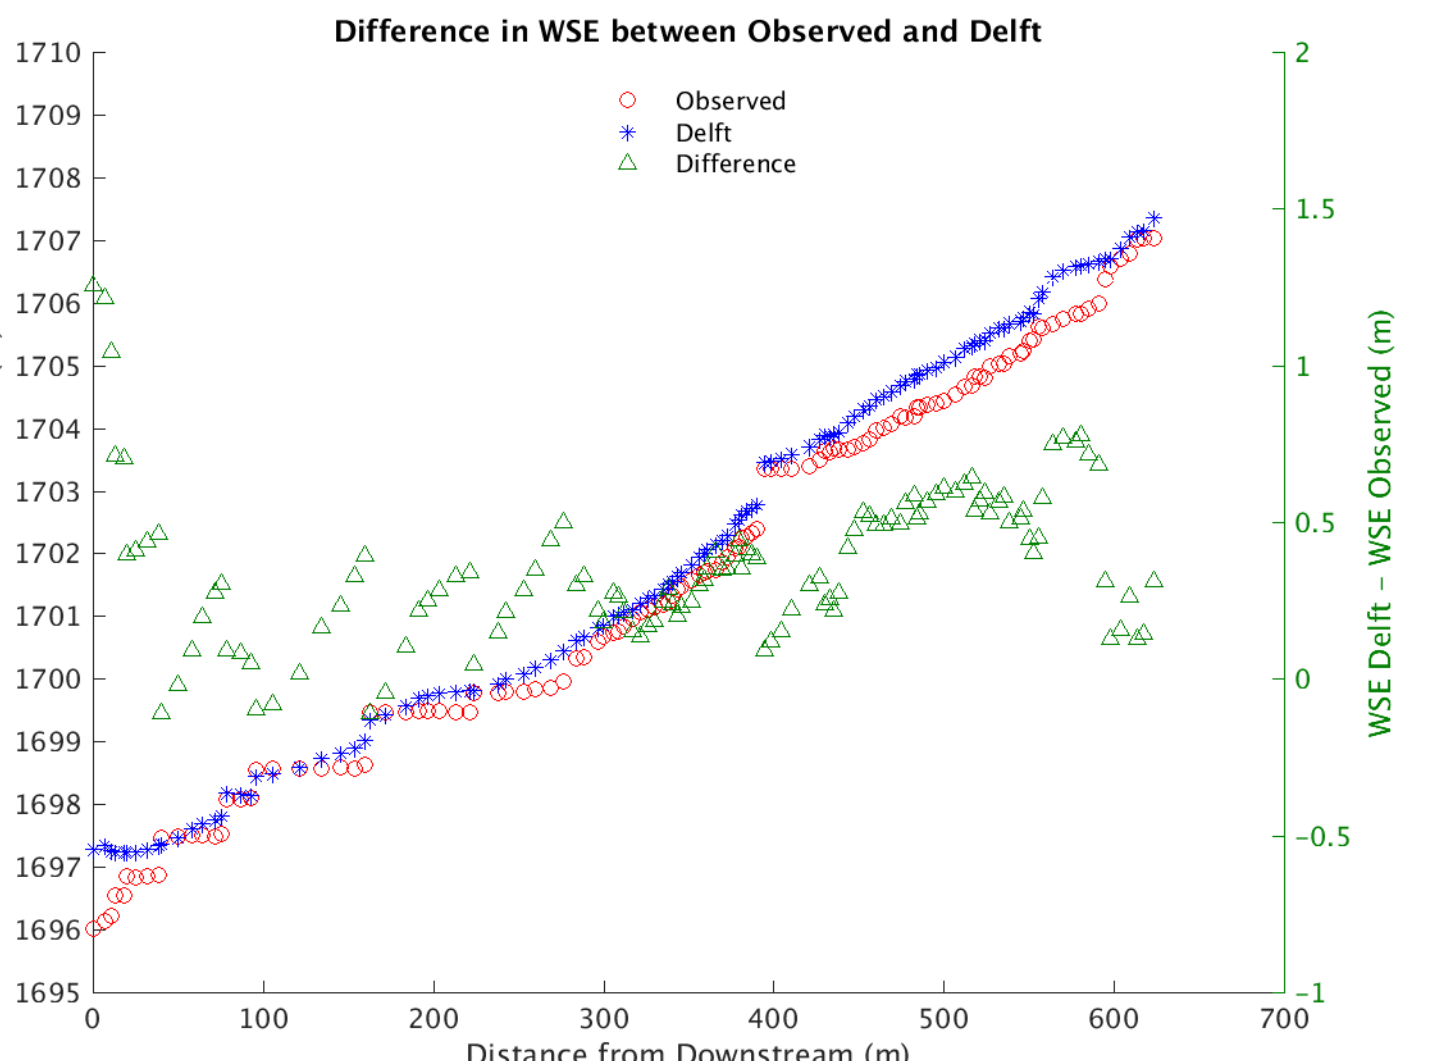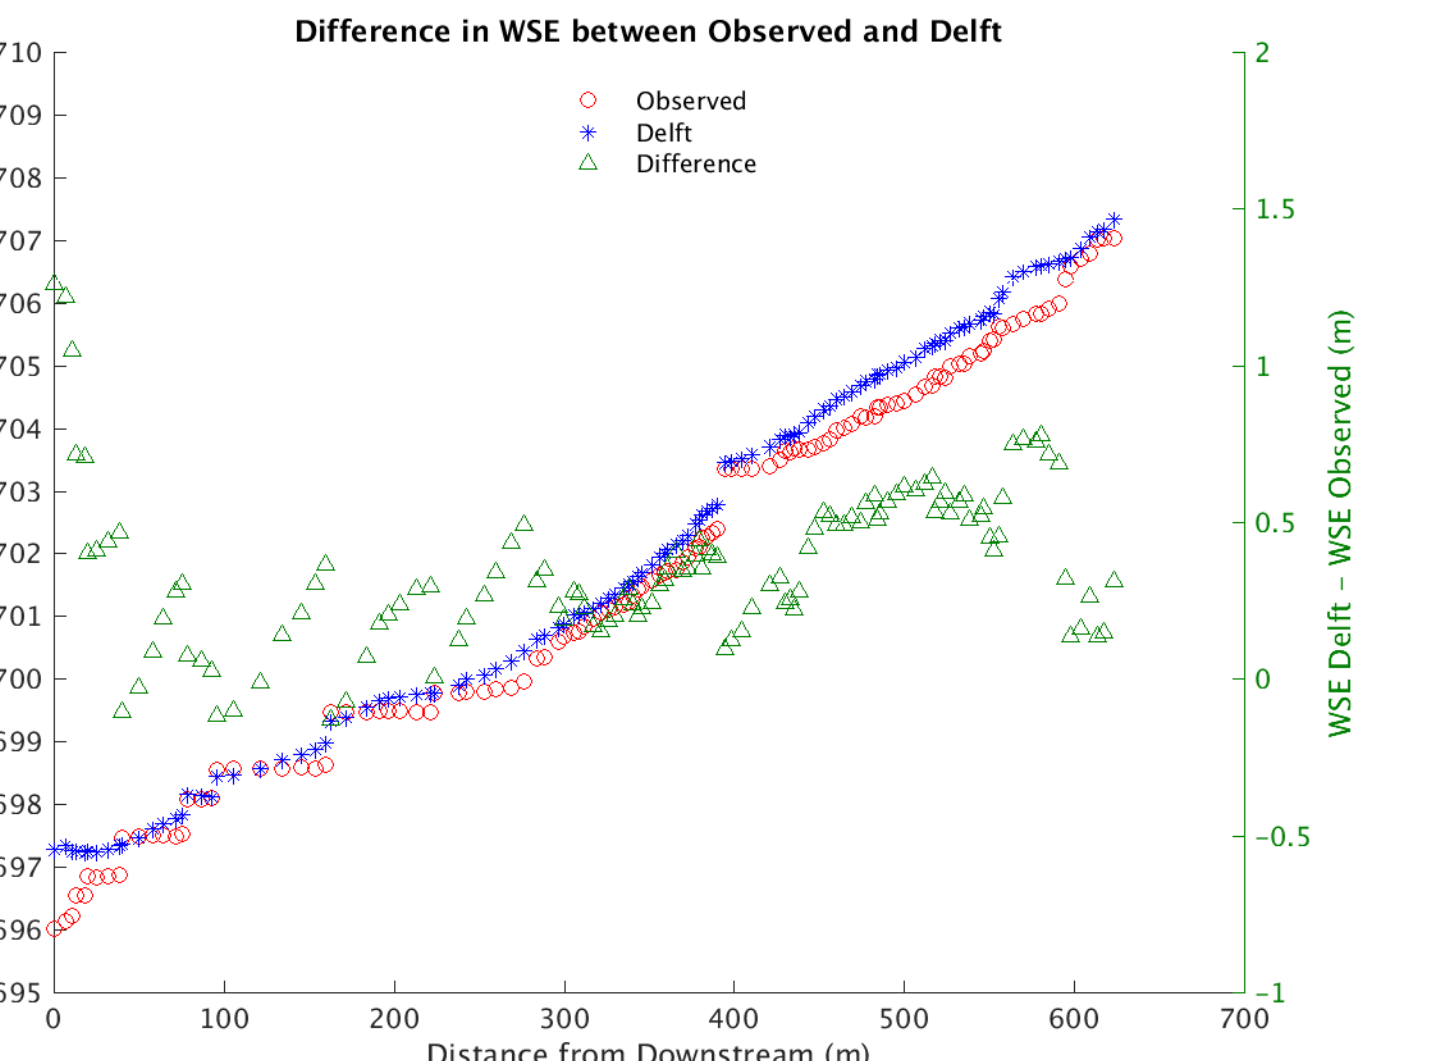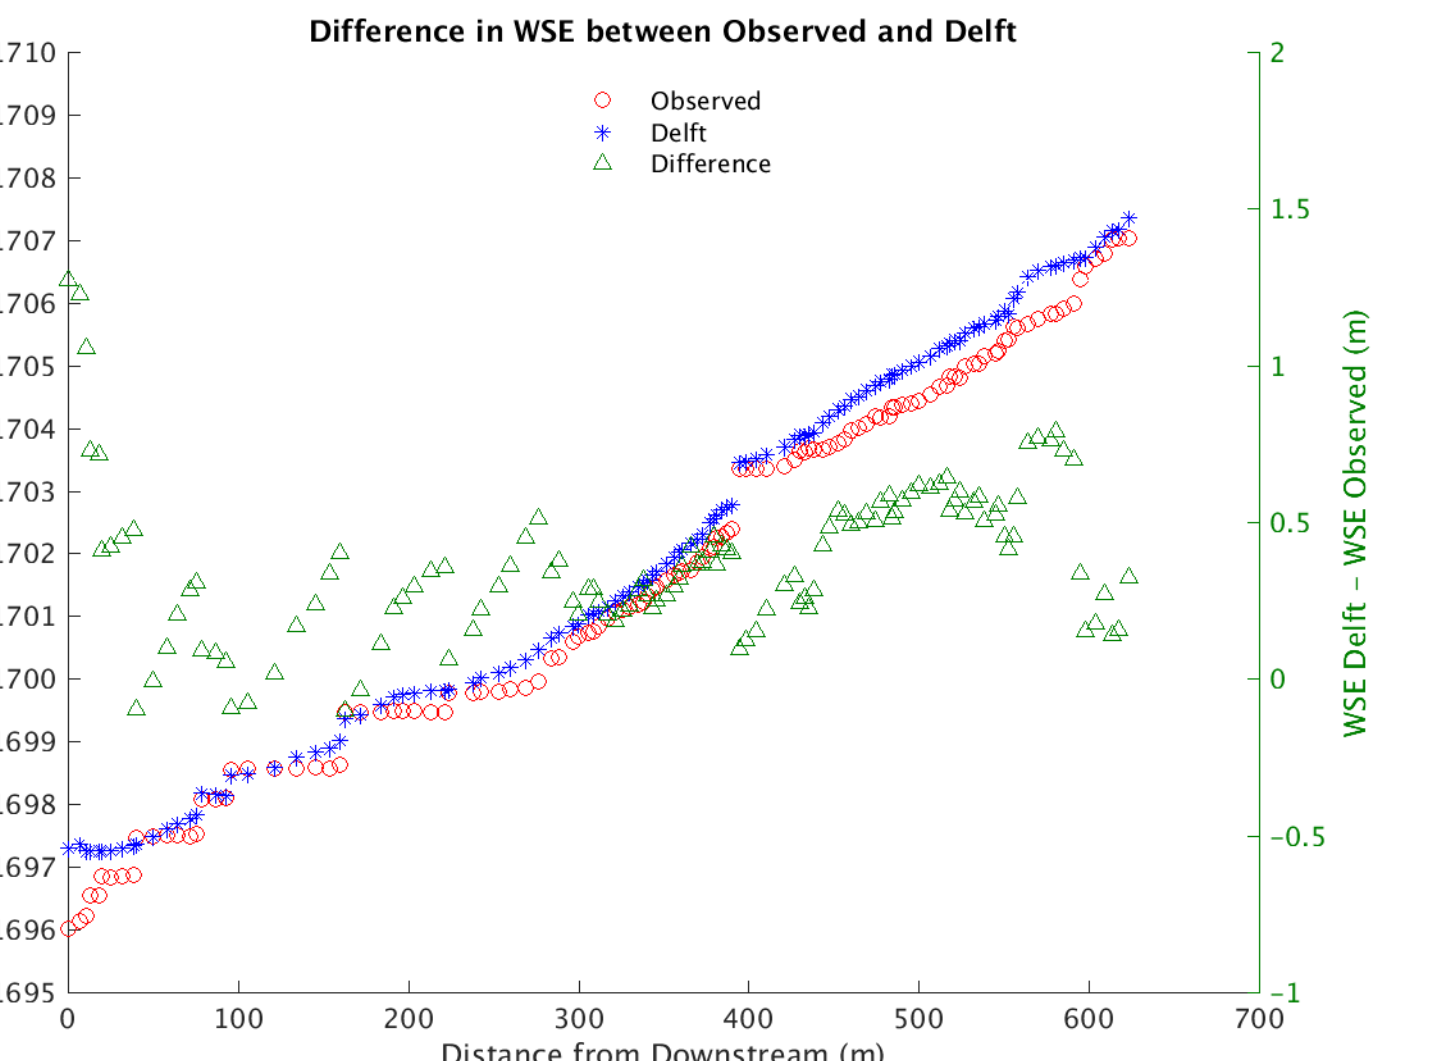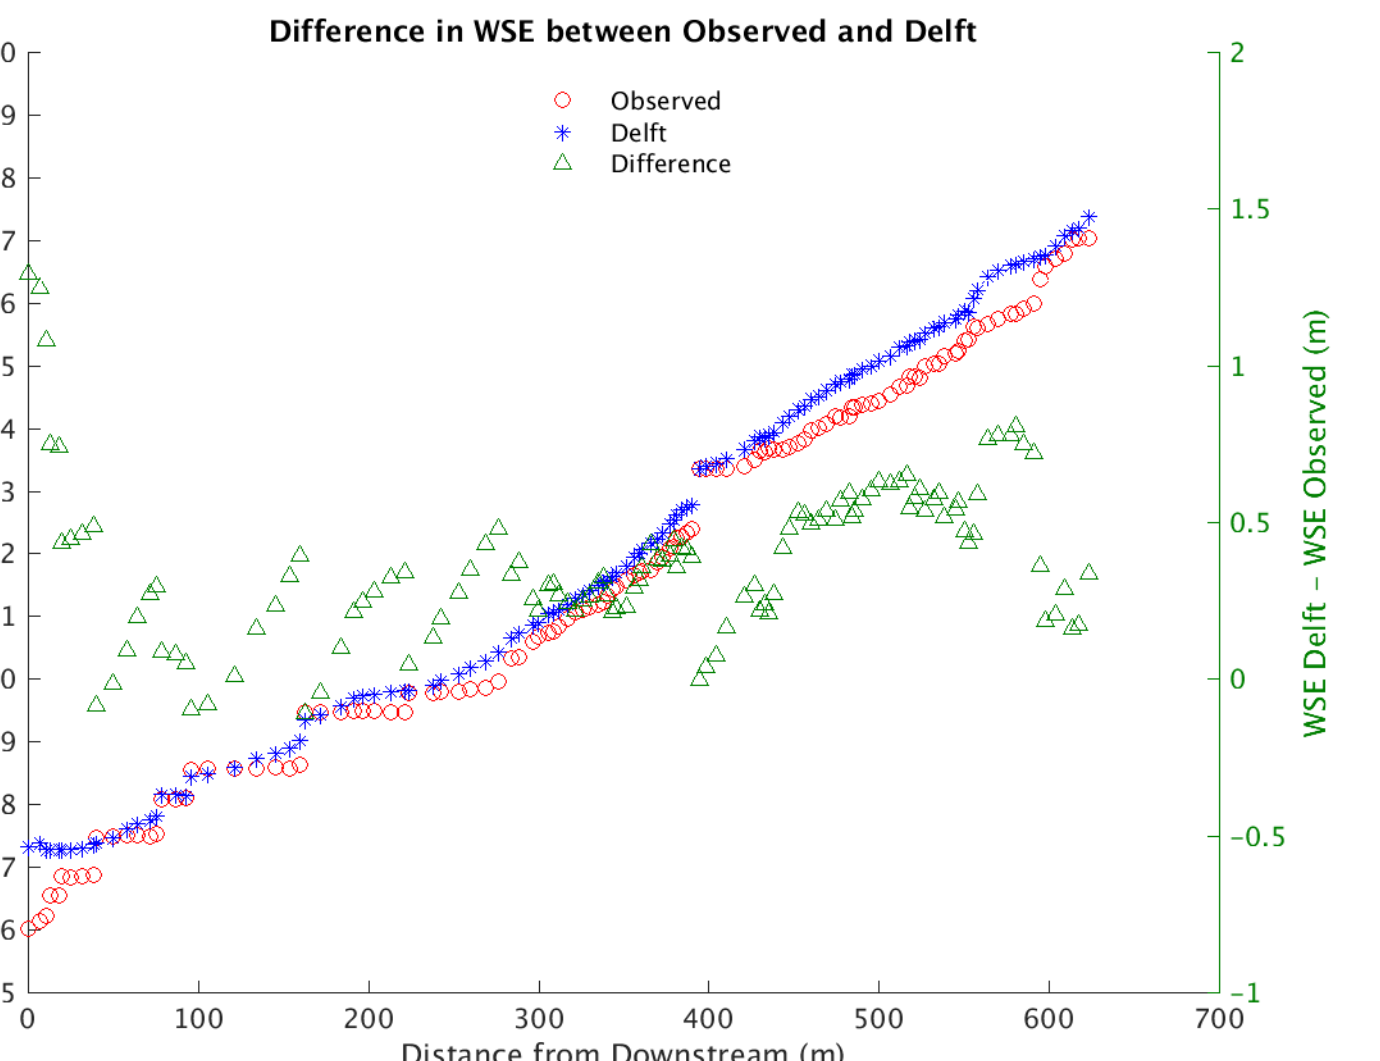

Supplement: Supplementary file 2 [file hess-2017-521-supplement.zip]
